# Supplementary material for: Proteomic landscape of tunneling nanotubes reveals CD9 and CD81 tetraspanins as key regulators
Source: bioRxiv preprint, doi:10.1101/2022.12.21.521537, version 2 (2024-05-14)
Supplement: table S1 [file 521537_file12.xlsx]

## Sheet: TNTome
Majority protein IDs	Majority protein IDs	iBAQ 3T2-EP69	iBAQ 3T2-EP70	iBAQ Mb-234T	iBAQ Mb-254-3-1	iBAQ Mb-254-9-1	iBAQ Mb-254-9-2	iBAQ Mb-254-9-3	iBAQ Mb-254-9-4	iBAQ Mb-254T	iBAQ Mb-3-MIG	iBAQ U205-EP69	iBAQ U205-EP70	Nb >0	Mean iBAC	SD	Entry	Protein names	Gene Ontology (biological process)	Gene Ontology (cellular component)	Gene Ontology (GO)	Gene Ontology (molecular function)	Gene Ontology IDs
sp|P04406|G3P_HUMAN	G3P_HUMAN	1524100000	1486100000	48238000	1632900000	938250000	2466200000	1381300000	782500000	217170000	2796700000	2430000000	1537900000	12	1.43678e+09	8.55438e+08	P04406	Glyceraldehyde-3-phosphate dehydrogenase (GAPDH) (EC 1.2.1.12) (Peptidyl-cysteine S-nitrosylase GAPDH) (EC 2.6.99.-)	antimicrobial humoral immune response mediated by antimicrobial peptide [GO:0061844]; cellular response to type II interferon [GO:0071346]; defense response to fungus [GO:0050832]; glucose metabolic process [GO:0006006]; glycolytic process [GO:0006096]; killing by host of symbiont cells [GO:0051873]; killing of cells of another organism [GO:0031640]; microtubule cytoskeleton organization [GO:0000…	cytoplasm [GO:0005737]; cytosol [GO:0005829]; extracellular exosome [GO:0070062]; GAIT complex [GO:0097452]; intracellular membrane-bounded organelle [GO:0043231]; lipid droplet [GO:0005811]; membrane [GO:0016020]; microtubule cytoskeleton [GO:0015630]; nuclear membrane [GO:0031965]; nucleus [GO:0005634]; perinuclear region of cytoplasm [GO:0048471]; plasma membrane [GO:0005886]; ribonucleoprotei…	cytoplasm [GO:0005737]; cytosol [GO:0005829]; extracellular exosome [GO:0070062]; GAIT complex [GO:0097452]; intracellular membrane-bounded organelle [GO:0043231]; lipid droplet [GO:0005811]; membrane [GO:0016020]; microtubule cytoskeleton [GO:0015630]; nuclear membrane [GO:0031965]; nucleus [GO:0005634]; perinuclear region of cytoplasm [GO:0048471]; plasma membrane [GO:0005886]; ribonucleoprotei…	aspartic-type endopeptidase inhibitor activity [GO:0019828]; disordered domain specific binding [GO:0097718]; glyceraldehyde-3-phosphate dehydrogenase (NAD+) (phosphorylating) activity [GO:0004365]; identical protein binding [GO:0042802]; microtubule binding [GO:0008017]; NAD binding [GO:0051287]; NADP binding [GO:0050661]; peptidyl-cysteine S-nitrosylase activity [GO:0035605]	GO:0000226; GO:0001819; GO:0004365; GO:0005634; GO:0005737; GO:0005811; GO:0005829; GO:0005886; GO:0006006; GO:0006096; GO:0008017; GO:0010951; GO:0015630; GO:0016020; GO:0016241; GO:0017148; GO:0019828; GO:0031640; GO:0031965; GO:0031982; GO:0032481; GO:0035605; GO:0035606; GO:0042802; GO:0043123; GO:0043231; GO:0048471; GO:0050661; GO:0050821; GO:0050832; GO:0051287; GO:0051402; GO:0051873; GO:…
sp|Q93077|H2A1C_HUMAN	H2A1C_HUMAN	566180000	928670000	74906000	736910000	502890000	1071600000	1943700000	2231300000	253570000	1338200000	942930000	923180000	12	959503000	6.35197e+08	Q93077	Histone H2A type 1-C (H2A-clustered histone 6) (Histone H2A/l)	negative regulation of cell population proliferation [GO:0008285]	extracellular exosome [GO:0070062]; nucleoplasm [GO:0005654]; nucleosome [GO:0000786]; nucleus [GO:0005634]	extracellular exosome [GO:0070062]; nucleoplasm [GO:0005654]; nucleosome [GO:0000786]; nucleus [GO:0005634]; DNA binding [GO:0003677]; protein heterodimerization activity [GO:0046982]; structural constituent of chromatin [GO:0030527]; negative regulation of cell population proliferation [GO:0008285]	DNA binding [GO:0003677]; protein heterodimerization activity [GO:0046982]; structural constituent of chromatin [GO:0030527]	GO:0000786; GO:0003677; GO:0005634; GO:0005654; GO:0008285; GO:0030527; GO:0046982; GO:0070062
sp|P05386|RLA1_HUMAN	RLA1_HUMAN	330930000	765480000	357970000	729900000	928590000	1370700000	971400000	1550200000	967140000	797110000	1226700000	790730000	12	8.98904e+08	3.62899e+08	P05386	60S acidic ribosomal protein P1 (Large ribosomal subunit protein P1)	cytoplasmic translation [GO:0002181]; translation [GO:0006412]; translational elongation [GO:0006414]	cytoplasm [GO:0005737]; cytosol [GO:0005829]; cytosolic large ribosomal subunit [GO:0022625]; cytosolic ribosome [GO:0022626]; focal adhesion [GO:0005925]	cytoplasm [GO:0005737]; cytosol [GO:0005829]; cytosolic large ribosomal subunit [GO:0022625]; cytosolic ribosome [GO:0022626]; focal adhesion [GO:0005925]; protein kinase activator activity [GO:0030295]; ribonucleoprotein complex binding [GO:0043021]; structural constituent of ribosome [GO:0003735]; cytoplasmic translation [GO:0002181]; translation [GO:0006412]; translational elongation [GO:00064…	protein kinase activator activity [GO:0030295]; ribonucleoprotein complex binding [GO:0043021]; structural constituent of ribosome [GO:0003735]	GO:0002181; GO:0003735; GO:0005737; GO:0005829; GO:0005925; GO:0006412; GO:0006414; GO:0022625; GO:0022626; GO:0030295; GO:0043021
sp|P63261|ACTG_HUMAN	ACTG_HUMAN	820270000	722680000	25274000	486580000	490170000	796920000	1015100000	947870000	39796000	1144400000	1193400000	852270000	12	711227500	3.84756e+08	P63261	Actin, cytoplasmic 2 (Gamma-actin) [Cleaved into: Actin, cytoplasmic 2, N-terminally processed]	angiogenesis [GO:0001525]; cellular response to type II interferon [GO:0071346]; maintenance of blood-brain barrier [GO:0035633]; morphogenesis of a polarized epithelium [GO:0001738]; platelet aggregation [GO:0070527]; positive regulation of cell migration [GO:0030335]; positive regulation of gene expression [GO:0010628]; positive regulation of wound healing [GO:0090303]; protein localization to …	actin filament [GO:0005884]; apical junction complex [GO:0043296]; basal body patch [GO:0120220]; blood microparticle [GO:0072562]; calyx of Held [GO:0044305]; cell-cell junction [GO:0005911]; cytoskeleton [GO:0005856]; cytosol [GO:0005829]; dense body [GO:0097433]; extracellular exosome [GO:0070062]; extracellular space [GO:0005615]; filamentous actin [GO:0031941]; focal adhesion [GO:0005925]; m…	actin filament [GO:0005884]; apical junction complex [GO:0043296]; basal body patch [GO:0120220]; blood microparticle [GO:0072562]; calyx of Held [GO:0044305]; cell-cell junction [GO:0005911]; cytoskeleton [GO:0005856]; cytosol [GO:0005829]; dense body [GO:0097433]; extracellular exosome [GO:0070062]; extracellular space [GO:0005615]; filamentous actin [GO:0031941]; focal adhesion [GO:0005925]; m…	ATP binding [GO:0005524]; hydrolase activity [GO:0016787]; identical protein binding [GO:0042802]; profilin binding [GO:0005522]; structural constituent of cytoskeleton [GO:0005200]; structural constituent of postsynaptic actin cytoskeleton [GO:0098973]; ubiquitin protein ligase binding [GO:0031625]	GO:0001525; GO:0001738; GO:0001895; GO:0005200; GO:0005522; GO:0005524; GO:0005615; GO:0005634; GO:0005829; GO:0005856; GO:0005884; GO:0005886; GO:0005911; GO:0005925; GO:0009612; GO:0010628; GO:0016020; GO:0016787; GO:0030016; GO:0030335; GO:0031625; GO:0031941; GO:0035633; GO:0042802; GO:0043296; GO:0044305; GO:0045214; GO:0045335; GO:0051492; GO:0051592; GO:0051893; GO:0070062; GO:0070527; GO:…
sp|P05387|RLA2_HUMAN	RLA2_HUMAN	475450000	406450000	234730000	363210000	612850000	563020000	665570000	883720000	736580000	536940000	657310000	348590000	12	5.40368e+08	1.84698e+08	P05387	60S acidic ribosomal protein P2 (Large ribosomal subunit protein P2) (Renal carcinoma antigen NY-REN-44)	cytoplasmic translation [GO:0002181]; cytoplasmic translational elongation [GO:0002182]; translation [GO:0006412]	cytoplasm [GO:0005737]; cytosol [GO:0005829]; cytosolic large ribosomal subunit [GO:0022625]; extracellular exosome [GO:0070062]; focal adhesion [GO:0005925]; membrane [GO:0016020]	cytoplasm [GO:0005737]; cytosol [GO:0005829]; cytosolic large ribosomal subunit [GO:0022625]; extracellular exosome [GO:0070062]; focal adhesion [GO:0005925]; membrane [GO:0016020]; structural constituent of ribosome [GO:0003735]; cytoplasmic translation [GO:0002181]; cytoplasmic translational elongation [GO:0002182]; translation [GO:0006412]	structural constituent of ribosome [GO:0003735]	GO:0002181; GO:0002182; GO:0003735; GO:0005737; GO:0005829; GO:0005925; GO:0006412; GO:0016020; GO:0022625; GO:0070062
sp|P68371|TBB4B_HUMAN	TBB4B_HUMAN	585970000	425250000	11000000	617130000	408240000	565940000	689760000	583990000	11305000	891930000	1010800000	412950000	12	5.17855e+08	2.98291e+08	P68371	Tubulin beta-4B chain (Tubulin beta-2 chain) (Tubulin beta-2C chain)	microtubule cytoskeleton organization [GO:0000226]; mitotic cell cycle [GO:0000278]; natural killer cell mediated cytotoxicity [GO:0042267]	azurophil granule lumen [GO:0035578]; cytoplasm [GO:0005737]; cytoskeleton [GO:0005856]; cytosol [GO:0005829]; extracellular exosome [GO:0070062]; extracellular region [GO:0005576]; extracellular vesicle [GO:1903561]; intercellular bridge [GO:0045171]; microtubule [GO:0005874]; microtubule cytoskeleton [GO:0015630]; mitotic spindle [GO:0072686]; nucleus [GO:0005634]	azurophil granule lumen [GO:0035578]; cytoplasm [GO:0005737]; cytoskeleton [GO:0005856]; cytosol [GO:0005829]; extracellular exosome [GO:0070062]; extracellular region [GO:0005576]; extracellular vesicle [GO:1903561]; intercellular bridge [GO:0045171]; microtubule [GO:0005874]; microtubule cytoskeleton [GO:0015630]; mitotic spindle [GO:0072686]; nucleus [GO:0005634]; double-stranded RNA binding […	double-stranded RNA binding [GO:0003725]; GTP binding [GO:0005525]; GTPase activity [GO:0003924]; metal ion binding [GO:0046872]; MHC class I protein binding [GO:0042288]; structural constituent of cytoskeleton [GO:0005200]; unfolded protein binding [GO:0051082]	GO:0000226; GO:0000278; GO:0003725; GO:0003924; GO:0005200; GO:0005525; GO:0005576; GO:0005634; GO:0005737; GO:0005829; GO:0005856; GO:0005874; GO:0015630; GO:0035578; GO:0042267; GO:0042288; GO:0045171; GO:0046872; GO:0051082; GO:0070062; GO:0072686; GO:1903561
sp|Q9BQE3|TBA1C_HUMAN	TBA1C_HUMAN	467440000	373600000	10369000	425320000	383950000	649890000	760830000	540890000	12299000	889830000	856350000	388530000	12	479941500	2.84828e+08	Q9BQE3	Tubulin alpha-1C chain (Alpha-tubulin 6) (Tubulin alpha-6 chain) [Cleaved into: Detyrosinated tubulin alpha-1C chain]	cell division [GO:0051301]; cytoskeleton-dependent intracellular transport [GO:0030705]; microtubule cytoskeleton organization [GO:0000226]; microtubule-based process [GO:0007017]; mitotic cell cycle [GO:0000278]	cytoplasm [GO:0005737]; cytoplasmic microtubule [GO:0005881]; microtubule [GO:0005874]; microtubule cytoskeleton [GO:0015630]; nucleus [GO:0005634]; vesicle [GO:0031982]	cytoplasm [GO:0005737]; cytoplasmic microtubule [GO:0005881]; microtubule [GO:0005874]; microtubule cytoskeleton [GO:0015630]; nucleus [GO:0005634]; vesicle [GO:0031982]; GTP binding [GO:0005525]; hydrolase activity [GO:0016787]; metal ion binding [GO:0046872]; structural constituent of cytoskeleton [GO:0005200]; structural molecule activity [GO:0005198]; cell division [GO:0051301]; cytoskeleton-…	GTP binding [GO:0005525]; hydrolase activity [GO:0016787]; metal ion binding [GO:0046872]; structural constituent of cytoskeleton [GO:0005200]; structural molecule activity [GO:0005198]	GO:0000226; GO:0000278; GO:0005198; GO:0005200; GO:0005525; GO:0005634; GO:0005737; GO:0005874; GO:0005881; GO:0007017; GO:0015630; GO:0016787; GO:0030705; GO:0031982; GO:0046872; GO:0051301
sp|P62805|H4_HUMAN	H4_HUMAN	251590000	446130000	25853000	370860000	260810000	436870000	835580000	1044500000	60278000	505190000	581070000	543110000	12	4.4682e+08	2.92989e+08	P62805	Histone H4	negative regulation of megakaryocyte differentiation [GO:0045653]; nucleosome assembly [GO:0006334]; protein localization to CENP-A containing chromatin [GO:0061644]; telomere organization [GO:0032200]	CENP-A containing nucleosome [GO:0043505]; chromosome, telomeric region [GO:0000781]; extracellular exosome [GO:0070062]; extracellular region [GO:0005576]; membrane [GO:0016020]; nucleoplasm [GO:0005654]; nucleosome [GO:0000786]; nucleus [GO:0005634]; protein-containing complex [GO:0032991]	CENP-A containing nucleosome [GO:0043505]; chromosome, telomeric region [GO:0000781]; extracellular exosome [GO:0070062]; extracellular region [GO:0005576]; membrane [GO:0016020]; nucleoplasm [GO:0005654]; nucleosome [GO:0000786]; nucleus [GO:0005634]; protein-containing complex [GO:0032991]; DNA binding [GO:0003677]; protein heterodimerization activity [GO:0046982]; RNA binding [GO:0003723]; str…	DNA binding [GO:0003677]; protein heterodimerization activity [GO:0046982]; RNA binding [GO:0003723]; structural constituent of chromatin [GO:0030527]	GO:0000781; GO:0000786; GO:0003677; GO:0003723; GO:0005576; GO:0005634; GO:0005654; GO:0006334; GO:0016020; GO:0030527; GO:0032200; GO:0032991; GO:0043505; GO:0045653; GO:0046982; GO:0061644; GO:0070062
sp|P68104|EF1A1_HUMAN	EF1A1_HUMAN	298140000	279380000	5148000	361710000	365050000	558500000	649560000	921700000	12402000	619630000	553580000	324670000	12	4.12456e+08	2.64397e+08	P68104	Elongation factor 1-alpha 1 (EF-1-alpha-1) (Elongation factor Tu) (EF-Tu) (Eukaryotic elongation factor 1 A-1) (eEF1A-1) (Leukocyte receptor cluster member 7)	cellular response to epidermal growth factor stimulus [GO:0071364]; positive regulation by host of viral genome replication [GO:0044829]; regulation of chaperone-mediated autophagy [GO:1904714]; regulation of D-erythro-sphingosine kinase activity [GO:1900022]; translation [GO:0006412]; translational elongation [GO:0006414]	cortical actin cytoskeleton [GO:0030864]; cytoplasm [GO:0005737]; cytoplasmic side of lysosomal membrane [GO:0098574]; cytosol [GO:0005829]; cytosolic ribosome [GO:0022626]; eukaryotic translation elongation factor 1 complex [GO:0005853]; extracellular exosome [GO:0070062]; extracellular region [GO:0005576]; extracellular space [GO:0005615]; ficolin-1-rich granule lumen [GO:1904813]; membrane [GO…	cortical actin cytoskeleton [GO:0030864]; cytoplasm [GO:0005737]; cytoplasmic side of lysosomal membrane [GO:0098574]; cytosol [GO:0005829]; cytosolic ribosome [GO:0022626]; eukaryotic translation elongation factor 1 complex [GO:0005853]; extracellular exosome [GO:0070062]; extracellular region [GO:0005576]; extracellular space [GO:0005615]; ficolin-1-rich granule lumen [GO:1904813]; membrane [GO…	GTP binding [GO:0005525]; GTPase activity [GO:0003924]; kinase binding [GO:0019900]; molecular adaptor activity [GO:0060090]; protein kinase binding [GO:0019901]; RNA binding [GO:0003723]; translation elongation factor activity [GO:0003746]; tRNA binding [GO:0000049]	GO:0000049; GO:0003723; GO:0003746; GO:0003924; GO:0005525; GO:0005576; GO:0005615; GO:0005634; GO:0005730; GO:0005737; GO:0005829; GO:0005853; GO:0005886; GO:0006412; GO:0006414; GO:0016020; GO:0019900; GO:0019901; GO:0022626; GO:0030864; GO:0032587; GO:0034774; GO:0044829; GO:0060090; GO:0070062; GO:0071364; GO:0098574; GO:1900022; GO:1904714; GO:1904813
sp|P07437|TBB5_HUMAN	TBB5_HUMAN	454380000	375010000	5305900	415290000	310910000	264530000	549700000	449740000	11801000	613420000	646020000	419560000	12	376305575	2.04759e+08	P07437	Tubulin beta chain (Tubulin beta-5 chain)	cell division [GO:0051301]; cytoskeleton-dependent intracellular transport [GO:0030705]; microtubule cytoskeleton organization [GO:0000226]; microtubule-based process [GO:0007017]; mitotic cell cycle [GO:0000278]; natural killer cell mediated cytotoxicity [GO:0042267]; odontoblast differentiation [GO:0071895]; regulation of synapse organization [GO:0050807]; spindle assembly [GO:0051225]	azurophil granule lumen [GO:0035578]; cell body [GO:0044297]; cytoplasm [GO:0005737]; cytoplasmic ribonucleoprotein granule [GO:0036464]; cytoskeleton [GO:0005856]; cytosol [GO:0005829]; extracellular exosome [GO:0070062]; extracellular region [GO:0005576]; intercellular bridge [GO:0045171]; membrane raft [GO:0045121]; microtubule [GO:0005874]; microtubule cytoskeleton [GO:0015630]; mitotic spind…	azurophil granule lumen [GO:0035578]; cell body [GO:0044297]; cytoplasm [GO:0005737]; cytoplasmic ribonucleoprotein granule [GO:0036464]; cytoskeleton [GO:0005856]; cytosol [GO:0005829]; extracellular exosome [GO:0070062]; extracellular region [GO:0005576]; intercellular bridge [GO:0045171]; membrane raft [GO:0045121]; microtubule [GO:0005874]; microtubule cytoskeleton [GO:0015630]; mitotic spind…	GTP binding [GO:0005525]; GTPase activating protein binding [GO:0032794]; GTPase activity [GO:0003924]; metal ion binding [GO:0046872]; MHC class I protein binding [GO:0042288]; protein domain specific binding [GO:0019904]; protein-containing complex binding [GO:0044877]; structural constituent of cytoskeleton [GO:0005200]; structural molecule activity [GO:0005198]; ubiquitin protein ligase bindi…	GO:0000226; GO:0000278; GO:0003924; GO:0005198; GO:0005200; GO:0005525; GO:0005576; GO:0005634; GO:0005641; GO:0005737; GO:0005829; GO:0005856; GO:0005874; GO:0007017; GO:0015630; GO:0019904; GO:0030705; GO:0031625; GO:0032794; GO:0032991; GO:0035578; GO:0036464; GO:0042267; GO:0042288; GO:0044297; GO:0044877; GO:0045121; GO:0045171; GO:0046872; GO:0050807; GO:0051225; GO:0051301; GO:0070062; GO:…
sp|P69905|HBA_HUMAN	HBA_HUMAN	64946000	167620000	5387200	267220000	228310000	467090000	459920000	1539600000	3916800	985360000	115440000	52814000	12	3.63135e+08	4.6325e+08	P69905	Hemoglobin subunit alpha (Alpha-globin) (Hemoglobin alpha chain)	carbon dioxide transport [GO:0015670]; cellular oxidant detoxification [GO:0098869]; hydrogen peroxide catabolic process [GO:0042744]; nitric oxide transport [GO:0030185]; oxygen transport [GO:0015671]; positive regulation of cell death [GO:0010942]; response to hydrogen peroxide [GO:0042542]	blood microparticle [GO:0072562]; cytosol [GO:0005829]; endocytic vesicle lumen [GO:0071682]; extracellular exosome [GO:0070062]; extracellular region [GO:0005576]; extracellular space [GO:0005615]; haptoglobin-hemoglobin complex [GO:0031838]; hemoglobin complex [GO:0005833]; membrane [GO:0016020]	blood microparticle [GO:0072562]; cytosol [GO:0005829]; endocytic vesicle lumen [GO:0071682]; extracellular exosome [GO:0070062]; extracellular region [GO:0005576]; extracellular space [GO:0005615]; haptoglobin-hemoglobin complex [GO:0031838]; hemoglobin complex [GO:0005833]; membrane [GO:0016020]; G protein-coupled receptor binding [GO:0001664]; heme binding [GO:0020037]; iron ion binding [GO:00…	G protein-coupled receptor binding [GO:0001664]; heme binding [GO:0020037]; iron ion binding [GO:0005506]; organic acid binding [GO:0043177]; oxygen binding [GO:0019825]; oxygen carrier activity [GO:0005344]	GO:0001664; GO:0005344; GO:0005506; GO:0005576; GO:0005615; GO:0005829; GO:0005833; GO:0010942; GO:0015670; GO:0015671; GO:0016020; GO:0019825; GO:0020037; GO:0030185; GO:0031838; GO:0042542; GO:0042744; GO:0043177; GO:0070062; GO:0071682; GO:0072562; GO:0098869
sp|P07737|PROF1_HUMAN	PROF1_HUMAN	365760000	399480000	8435100	368130000	227780000	499400000	448380000	384290000	8692000	617740000	519540000	399590000	12	3.53935e+08	1.87568e+08	P07737	Profilin-1 (Epididymis tissue protein Li 184a) (Profilin I)	actin cytoskeleton organization [GO:0030036]; modification of postsynaptic actin cytoskeleton [GO:0098885]; modulation of chemical synaptic transmission [GO:0050804]; negative regulation of actin filament bundle assembly [GO:0032232]; negative regulation of actin filament polymerization [GO:0030837]; negative regulation of stress fiber assembly [GO:0051497]; neural tube closure [GO:0001843]; posi…	blood microparticle [GO:0072562]; cell cortex [GO:0005938]; cytoplasm [GO:0005737]; cytoskeleton [GO:0005856]; cytosol [GO:0005829]; extracellular exosome [GO:0070062]; focal adhesion [GO:0005925]; glutamatergic synapse [GO:0098978]; membrane [GO:0016020]; nucleus [GO:0005634]	blood microparticle [GO:0072562]; cell cortex [GO:0005938]; cytoplasm [GO:0005737]; cytoskeleton [GO:0005856]; cytosol [GO:0005829]; extracellular exosome [GO:0070062]; focal adhesion [GO:0005925]; glutamatergic synapse [GO:0098978]; membrane [GO:0016020]; nucleus [GO:0005634]; actin binding [GO:0003779]; actin monomer binding [GO:0003785]; adenyl-nucleotide exchange factor activity [GO:0000774];…	actin binding [GO:0003779]; actin monomer binding [GO:0003785]; adenyl-nucleotide exchange factor activity [GO:0000774]; cadherin binding [GO:0045296]; phosphatidylinositol-4,5-bisphosphate binding [GO:0005546]; phosphotyrosine residue binding [GO:0001784]; proline-rich region binding [GO:0070064]; RNA binding [GO:0003723]; small GTPase binding [GO:0031267]	GO:0000774; GO:0001784; GO:0001843; GO:0003723; GO:0003779; GO:0003785; GO:0005546; GO:0005634; GO:0005737; GO:0005829; GO:0005856; GO:0005925; GO:0005938; GO:0006357; GO:0010634; GO:0016020; GO:0030036; GO:0030833; GO:0030837; GO:0030838; GO:0031267; GO:0032232; GO:0032233; GO:0032781; GO:0045296; GO:0050804; GO:0050821; GO:0051497; GO:0060074; GO:0070062; GO:0070064; GO:0072562; GO:0098885; GO:…
sp|P09382|LEG1_HUMAN	LEG1_HUMAN	221950000	361200000	36504000	254140000	236460000	424080000	281560000	247820000	29820000	686790000	435880000	586060000	12	3.16855e+08	1.96181e+08	P09382	Galectin-1 (Gal-1) (14 kDa laminin-binding protein) (HLBP14) (14 kDa lectin) (Beta-galactoside-binding lectin L-14-I) (Galaptin) (HBL) (HPL) (Lactose-binding lectin 1) (Lectin galactoside-binding soluble 1) (Putative MAPK-activating protein PM12) (S-Lac lectin 1)	apoptotic process [GO:0006915]; cell-cell adhesion [GO:0098609]; myoblast differentiation [GO:0045445]; plasma cell differentiation [GO:0002317]; positive regulation of apoptotic process [GO:0043065]; positive regulation of I-kappaB kinase/NF-kappaB signaling [GO:0043123]; positive regulation of inflammatory response [GO:0050729]; positive regulation of viral entry into host cell [GO:0046598]; re…	collagen-containing extracellular matrix [GO:0062023]; cytoplasm [GO:0005737]; endoplasmic reticulum lumen [GO:0005788]; extracellular exosome [GO:0070062]; extracellular region [GO:0005576]; extracellular space [GO:0005615]; galectin complex [GO:1990724]	collagen-containing extracellular matrix [GO:0062023]; cytoplasm [GO:0005737]; endoplasmic reticulum lumen [GO:0005788]; extracellular exosome [GO:0070062]; extracellular region [GO:0005576]; extracellular space [GO:0005615]; galectin complex [GO:1990724]; carbohydrate binding [GO:0030246]; laminin binding [GO:0043236]; RNA binding [GO:0003723]; apoptotic process [GO:0006915]; cell-cell adhesion …	carbohydrate binding [GO:0030246]; laminin binding [GO:0043236]; RNA binding [GO:0003723]	GO:0002317; GO:0003723; GO:0005576; GO:0005615; GO:0005737; GO:0005788; GO:0006915; GO:0030246; GO:0031295; GO:0042981; GO:0043065; GO:0043123; GO:0043236; GO:0045445; GO:0046598; GO:0050729; GO:0062023; GO:0070062; GO:0098609; GO:1990724
sp|P04264|K2C1_HUMAN	K2C1_HUMAN	207030000	184930000	60168000	397650000	575030000	398930000	379590000	460550000	353020000	324850000	178700000	203280000	12	3.10311e+08	1.45446e+08	P04264	Keratin, type II cytoskeletal 1 (67 kDa cytokeratin) (Cytokeratin-1) (CK-1) (Hair alpha protein) (Keratin-1) (K1) (Type-II keratin Kb1)	complement activation, lectin pathway [GO:0001867]; establishment of skin barrier [GO:0061436]; fibrinolysis [GO:0042730]; keratinization [GO:0031424]; negative regulation of inflammatory response [GO:0050728]; peptide cross-linking [GO:0018149]; protein heterotetramerization [GO:0051290]; regulation of angiogenesis [GO:0045765]; response to oxidative stress [GO:0006979]; retina homeostasis [GO:0…	blood microparticle [GO:0072562]; collagen-containing extracellular matrix [GO:0062023]; cornified envelope [GO:0001533]; cytoplasm [GO:0005737]; cytoskeleton [GO:0005856]; cytosol [GO:0005829]; extracellular exosome [GO:0070062]; extracellular region [GO:0005576]; extracellular space [GO:0005615]; ficolin-1-rich granule lumen [GO:1904813]; keratin filament [GO:0045095]; membrane [GO:0016020]; nu…	blood microparticle [GO:0072562]; collagen-containing extracellular matrix [GO:0062023]; cornified envelope [GO:0001533]; cytoplasm [GO:0005737]; cytoskeleton [GO:0005856]; cytosol [GO:0005829]; extracellular exosome [GO:0070062]; extracellular region [GO:0005576]; extracellular space [GO:0005615]; ficolin-1-rich granule lumen [GO:1904813]; keratin filament [GO:0045095]; membrane [GO:0016020]; nu…	carbohydrate binding [GO:0030246]; protein heterodimerization activity [GO:0046982]; signaling receptor activity [GO:0038023]; structural constituent of skin epidermis [GO:0030280]	GO:0001533; GO:0001867; GO:0001895; GO:0005576; GO:0005615; GO:0005634; GO:0005737; GO:0005829; GO:0005856; GO:0006979; GO:0016020; GO:0018149; GO:0030246; GO:0030280; GO:0031424; GO:0038023; GO:0042730; GO:0045095; GO:0045765; GO:0046982; GO:0050728; GO:0051290; GO:0061436; GO:0062023; GO:0070062; GO:0072562; GO:1904813
sp|P13645|K1C10_HUMAN	K1C10_HUMAN	307330000	177780000	57206000	576350000	598520000	305560000	309290000	383450000	330170000	237110000	203930000	223470000	12	309180500	1.55343e+08	P13645	Keratin, type I cytoskeletal 10 (Cytokeratin-10) (CK-10) (Keratin-10) (K10)	epithelial cell differentiation [GO:0030855]; intermediate filament organization [GO:0045109]; keratinocyte differentiation [GO:0030216]; peptide cross-linking [GO:0018149]; positive regulation of epidermis development [GO:0045684]; protein heterotetramerization [GO:0051290]	cell surface [GO:0009986]; cornified envelope [GO:0001533]; cytoplasm [GO:0005737]; cytosol [GO:0005829]; extracellular exosome [GO:0070062]; extracellular space [GO:0005615]; intermediate filament [GO:0005882]; keratin filament [GO:0045095]; membrane [GO:0016020]; nucleus [GO:0005634]	cell surface [GO:0009986]; cornified envelope [GO:0001533]; cytoplasm [GO:0005737]; cytosol [GO:0005829]; extracellular exosome [GO:0070062]; extracellular space [GO:0005615]; intermediate filament [GO:0005882]; keratin filament [GO:0045095]; membrane [GO:0016020]; nucleus [GO:0005634]; protein heterodimerization activity [GO:0046982]; structural constituent of skin epidermis [GO:0030280]; epithe…	protein heterodimerization activity [GO:0046982]; structural constituent of skin epidermis [GO:0030280]	GO:0001533; GO:0005615; GO:0005634; GO:0005737; GO:0005829; GO:0005882; GO:0009986; GO:0016020; GO:0018149; GO:0030216; GO:0030280; GO:0030855; GO:0045095; GO:0045109; GO:0045684; GO:0046982; GO:0051290; GO:0070062
sp|P07355|ANXA2_HUMAN	ANXA2_HUMAN	184460000	204890000	95959000	221940000	305890000	361590000	366200000	475100000	149560000	364000000	336670000	248200000	12	2.76205e+08	1.09939e+08	P07355	Annexin A2 (Annexin II) (Annexin-2) (Calpactin I heavy chain) (Calpactin-1 heavy chain) (Chromobindin-8) (Lipocortin II) (Placental anticoagulant protein IV) (PAP-IV) (Protein I) (p36)	angiogenesis [GO:0001525]; collagen fibril organization [GO:0030199]; fibrinolysis [GO:0042730]; membrane raft assembly [GO:0001765]; mRNA transcription by RNA polymerase II [GO:0042789]; negative regulation of low-density lipoprotein particle receptor catabolic process [GO:0032804]; negative regulation of receptor internalization [GO:0002091]; osteoclast development [GO:0036035]; positive regula…	adherens junction [GO:0005912]; AnxA2-p11 complex [GO:1990665]; azurophil granule lumen [GO:0035578]; basement membrane [GO:0005604]; basolateral plasma membrane [GO:0016323]; cell surface [GO:0009986]; collagen-containing extracellular matrix [GO:0062023]; cornified envelope [GO:0001533]; cytoplasm [GO:0005737]; cytosol [GO:0005829]; early endosome [GO:0005769]; endosome [GO:0005768]; extracellu…	adherens junction [GO:0005912]; AnxA2-p11 complex [GO:1990665]; azurophil granule lumen [GO:0035578]; basement membrane [GO:0005604]; basolateral plasma membrane [GO:0016323]; cell surface [GO:0009986]; collagen-containing extracellular matrix [GO:0062023]; cornified envelope [GO:0001533]; cytoplasm [GO:0005737]; cytosol [GO:0005829]; early endosome [GO:0005769]; endosome [GO:0005768]; extracellu…	cadherin binding involved in cell-cell adhesion [GO:0098641]; calcium channel activity [GO:0005262]; calcium ion binding [GO:0005509]; calcium-dependent phospholipid binding [GO:0005544]; calcium-dependent protein binding [GO:0048306]; cytoskeletal protein binding [GO:0008092]; identical protein binding [GO:0042802]; phosphatidylinositol-4,5-bisphosphate binding [GO:0005546]; phosphatidylserine b…	GO:0001525; GO:0001533; GO:0001765; GO:0001786; GO:0001921; GO:0002020; GO:0002091; GO:0003723; GO:0004867; GO:0005262; GO:0005509; GO:0005544; GO:0005546; GO:0005576; GO:0005604; GO:0005615; GO:0005634; GO:0005737; GO:0005765; GO:0005768; GO:0005769; GO:0005811; GO:0005829; GO:0005886; GO:0005912; GO:0006900; GO:0008092; GO:0009986; GO:0010756; GO:0016020; GO:0016323; GO:0016363; GO:0019834; GO:…
sp|P25398|RS12_HUMAN	RS12_HUMAN	303970000	226190000	57344000	268590000	413400000	302200000	303210000	423430000	151890000	267450000	345850000	240600000	12	2.75344e+08	1.02147e+08	P25398	40S ribosomal protein S12 (Small ribosomal subunit protein eS12)	cytoplasmic translation [GO:0002181]; positive regulation of canonical Wnt signaling pathway [GO:0090263]; ribosomal small subunit biogenesis [GO:0042274]; translation [GO:0006412]	cytoplasm [GO:0005737]; cytosol [GO:0005829]; cytosolic ribosome [GO:0022626]; cytosolic small ribosomal subunit [GO:0022627]; Golgi apparatus [GO:0005794]; intracellular membrane-bounded organelle [GO:0043231]; membrane [GO:0016020]; nucleolus [GO:0005730]; nucleoplasm [GO:0005654]; small-subunit processome [GO:0032040]	cytoplasm [GO:0005737]; cytosol [GO:0005829]; cytosolic ribosome [GO:0022626]; cytosolic small ribosomal subunit [GO:0022627]; Golgi apparatus [GO:0005794]; intracellular membrane-bounded organelle [GO:0043231]; membrane [GO:0016020]; nucleolus [GO:0005730]; nucleoplasm [GO:0005654]; small-subunit processome [GO:0032040]; RNA binding [GO:0003723]; structural constituent of ribosome [GO:0003735]; …	RNA binding [GO:0003723]; structural constituent of ribosome [GO:0003735]	GO:0002181; GO:0003723; GO:0003735; GO:0005654; GO:0005730; GO:0005737; GO:0005794; GO:0005829; GO:0006412; GO:0016020; GO:0022626; GO:0022627; GO:0032040; GO:0042274; GO:0043231; GO:0090263
sp|P62829|RL23_HUMAN	RL23_HUMAN	187680000	229300000	46699000	416220000	176650000	494120000	281800000	326010000	111090000	436620000	354200000	201520000	12	271825750	1.37064e+08	P62829	60S ribosomal protein L23 (60S ribosomal protein L17) (Large ribosomal subunit protein uL14)	cellular response to actinomycin D [GO:0072717]; cytoplasmic translation [GO:0002181]; G1 to G0 transition [GO:0070314]; negative regulation of transcription by RNA polymerase II [GO:0000122]; negative regulation of ubiquitin protein ligase activity [GO:1904667]; negative regulation of ubiquitin-dependent protein catabolic process [GO:2000059]; positive regulation of cell population proliferation…	cytoplasm [GO:0005737]; cytosol [GO:0005829]; cytosolic large ribosomal subunit [GO:0022625]; cytosolic ribosome [GO:0022626]; extracellular exosome [GO:0070062]; focal adhesion [GO:0005925]; membrane [GO:0016020]; nucleolus [GO:0005730]; nucleoplasm [GO:0005654]; protein-containing complex [GO:0032991]; ribosome [GO:0005840]; synapse [GO:0045202]	cytoplasm [GO:0005737]; cytosol [GO:0005829]; cytosolic large ribosomal subunit [GO:0022625]; cytosolic ribosome [GO:0022626]; extracellular exosome [GO:0070062]; focal adhesion [GO:0005925]; membrane [GO:0016020]; nucleolus [GO:0005730]; nucleoplasm [GO:0005654]; protein-containing complex [GO:0032991]; ribosome [GO:0005840]; synapse [GO:0045202]; large ribosomal subunit rRNA binding [GO:0070180…	large ribosomal subunit rRNA binding [GO:0070180]; RNA binding [GO:0003723]; structural constituent of ribosome [GO:0003735]; transcription coactivator binding [GO:0001223]; ubiquitin ligase inhibitor activity [GO:1990948]; ubiquitin protein ligase binding [GO:0031625]	GO:0000122; GO:0001223; GO:0002181; GO:0003723; GO:0003735; GO:0005654; GO:0005730; GO:0005737; GO:0005829; GO:0005840; GO:0005925; GO:0006412; GO:0006610; GO:0008284; GO:0010628; GO:0016020; GO:0022625; GO:0022626; GO:0031625; GO:0032986; GO:0032991; GO:0045202; GO:0050821; GO:0070062; GO:0070180; GO:0070314; GO:0072717; GO:1901798; GO:1903450; GO:1904667; GO:1990948; GO:2000059
sp|Q16778|H2B2E_HUMAN	H2B2E_HUMAN	227900000	326030000	5806200	197460000	162680000	267090000	555390000	356220000	37532000	300160000	439880000	288250000	12	263699850	1.54933e+08	Q16778	Histone H2B type 2-E (H2B-clustered histone 21) (Histone H2B-GL105) (Histone H2B.q) (H2B/q)	antibacterial humoral response [GO:0019731]; antimicrobial humoral immune response mediated by antimicrobial peptide [GO:0061844]; defense response to Gram-positive bacterium [GO:0050830]; innate immune response in mucosa [GO:0002227]; nucleosome assembly [GO:0006334]	cytosol [GO:0005829]; extracellular exosome [GO:0070062]; extracellular space [GO:0005615]; nucleoplasm [GO:0005654]; nucleosome [GO:0000786]; nucleus [GO:0005634]	cytosol [GO:0005829]; extracellular exosome [GO:0070062]; extracellular space [GO:0005615]; nucleoplasm [GO:0005654]; nucleosome [GO:0000786]; nucleus [GO:0005634]; DNA binding [GO:0003677]; protein heterodimerization activity [GO:0046982]; structural constituent of chromatin [GO:0030527]; antibacterial humoral response [GO:0019731]; antimicrobial humoral immune response mediated by antimicrobial…	DNA binding [GO:0003677]; protein heterodimerization activity [GO:0046982]; structural constituent of chromatin [GO:0030527]	GO:0000786; GO:0002227; GO:0003677; GO:0005615; GO:0005634; GO:0005654; GO:0005829; GO:0006334; GO:0019731; GO:0030527; GO:0046982; GO:0050830; GO:0061844; GO:0070062
sp|P04792|HSPB1_HUMAN	HSPB1_HUMAN	142180000	105090000	14779000	265610000	228160000	447640000	374270000	632320000	15096000	476040000	275880000	120970000	12	2.5817e+08	1.93564e+08	P04792	Heat shock protein beta-1 (HspB1) (28 kDa heat shock protein) (Estrogen-regulated 24 kDa protein) (Heat shock 27 kDa protein) (HSP 27) (Stress-responsive protein 27) (SRP27)	anterograde axonal protein transport [GO:0099641]; cellular response to vascular endothelial growth factor stimulus [GO:0035924]; chaperone-mediated protein folding [GO:0061077]; intracellular signal transduction [GO:0035556]; negative regulation of apoptotic process [GO:0043066]; negative regulation of oxidative stress-induced intrinsic apoptotic signaling pathway [GO:1902176]; negative regulati…	axon cytoplasm [GO:1904115]; cornified envelope [GO:0001533]; cytoplasm [GO:0005737]; cytoskeleton [GO:0005856]; cytosol [GO:0005829]; extracellular exosome [GO:0070062]; extracellular space [GO:0005615]; focal adhesion [GO:0005925]; nucleus [GO:0005634]; proteasome complex [GO:0000502]; spindle [GO:0005819]; Z disc [GO:0030018]	axon cytoplasm [GO:1904115]; cornified envelope [GO:0001533]; cytoplasm [GO:0005737]; cytoskeleton [GO:0005856]; cytosol [GO:0005829]; extracellular exosome [GO:0070062]; extracellular space [GO:0005615]; focal adhesion [GO:0005925]; nucleus [GO:0005634]; proteasome complex [GO:0000502]; spindle [GO:0005819]; Z disc [GO:0030018]; identical protein binding [GO:0042802]; protein folding chaperone […	identical protein binding [GO:0042802]; protein folding chaperone [GO:0044183]; protein homodimerization activity [GO:0042803]; protein kinase binding [GO:0019901]; protein kinase C binding [GO:0005080]; protein kinase C inhibitor activity [GO:0008426]; RNA binding [GO:0003723]; RNA polymerase II-specific DNA-binding transcription factor binding [GO:0061629]; ubiquitin binding [GO:0043130]	GO:0000502; GO:0001533; GO:0001895; GO:0001932; GO:0003723; GO:0005080; GO:0005615; GO:0005634; GO:0005737; GO:0005819; GO:0005829; GO:0005856; GO:0005925; GO:0006446; GO:0006469; GO:0006986; GO:0008426; GO:0009615; GO:0010506; GO:0019901; GO:0030018; GO:0032731; GO:0032760; GO:0035556; GO:0035924; GO:0038033; GO:0042802; GO:0042803; GO:0043066; GO:0043122; GO:0043130; GO:0043536; GO:0044183; GO:…
sp|P14618|KPYM_HUMAN	KPYM_HUMAN	255700000	202480000	5012800	192050000	164820000	286570000	322030000	291370000	9976900	492330000	376630000	223660000	12	2.35219e+08	1.38696e+08	P14618	Pyruvate kinase PKM (EC 2.7.1.40) (Cytosolic thyroid hormone-binding protein) (CTHBP) (Opa-interacting protein 3) (OIP-3) (Pyruvate kinase 2/3) (Pyruvate kinase muscle isozyme) (Thyroid hormone-binding protein 1) (THBP1) (Tumor M2-PK) (p58)	canonical glycolysis [GO:0061621]; cellular response to insulin stimulus [GO:0032869]; glycolytic process [GO:0006096]; phosphorylation [GO:0016310]; positive regulation of cytoplasmic translation [GO:2000767]; positive regulation of sprouting angiogenesis [GO:1903672]; positive regulation of transcription by RNA polymerase II [GO:0045944]; programmed cell death [GO:0012501]	cilium [GO:0005929]; collagen-containing extracellular matrix [GO:0062023]; cytoplasm [GO:0005737]; cytosol [GO:0005829]; extracellular exosome [GO:0070062]; extracellular region [GO:0005576]; extracellular vesicle [GO:1903561]; ficolin-1-rich granule lumen [GO:1904813]; mitochondrion [GO:0005739]; nucleus [GO:0005634]; rough endoplasmic reticulum [GO:0005791]; secretory granule lumen [GO:0034774…	cilium [GO:0005929]; collagen-containing extracellular matrix [GO:0062023]; cytoplasm [GO:0005737]; cytosol [GO:0005829]; extracellular exosome [GO:0070062]; extracellular region [GO:0005576]; extracellular vesicle [GO:1903561]; ficolin-1-rich granule lumen [GO:1904813]; mitochondrion [GO:0005739]; nucleus [GO:0005634]; rough endoplasmic reticulum [GO:0005791]; secretory granule lumen [GO:0034774…	ATP binding [GO:0005524]; cadherin binding [GO:0045296]; histone H3T11 kinase activity [GO:0035402]; magnesium ion binding [GO:0000287]; MHC class II protein complex binding [GO:0023026]; mRNA binding [GO:0003729]; potassium ion binding [GO:0030955]; protein homodimerization activity [GO:0042803]; protein tyrosine kinase activity [GO:0004713]; pyruvate kinase activity [GO:0004743]; RNA binding [G…	GO:0000287; GO:0003713; GO:0003723; GO:0003729; GO:0004713; GO:0004743; GO:0005524; GO:0005576; GO:0005634; GO:0005737; GO:0005739; GO:0005791; GO:0005829; GO:0005929; GO:0006096; GO:0012501; GO:0016310; GO:0023026; GO:0030955; GO:0031982; GO:0032869; GO:0034774; GO:0035402; GO:0042803; GO:0045296; GO:0045944; GO:0061621; GO:0062023; GO:0070062; GO:1903561; GO:1903672; GO:1904813; GO:2000767
sp|P23528|COF1_HUMAN	COF1_HUMAN	229620000	156380000	70377000	173930000	117920000	243720000	237480000	327250000	115240000	348940000	273560000	231620000	12	2.10503e+08	8.57916e+07	P23528	Cofilin-1 (18 kDa phosphoprotein) (p18) (Cofilin, non-muscle isoform)	actin cytoskeleton organization [GO:0030036]; actin filament depolymerization [GO:0030042]; actin filament fragmentation [GO:0030043]; actin filament severing [GO:0051014]; cytoskeleton organization [GO:0007010]; establishment of spindle localization [GO:0051293]; mitotic cytokinesis [GO:0000281]; negative regulation of apoptotic process [GO:0043066]; positive regulation by host of viral process …	actin cytoskeleton [GO:0015629]; cytoplasm [GO:0005737]; cytosol [GO:0005829]; extracellular exosome [GO:0070062]; extracellular space [GO:0005615]; focal adhesion [GO:0005925]; growth cone [GO:0030426]; lamellipodium [GO:0030027]; lamellipodium membrane [GO:0031258]; membrane [GO:0016020]; nuclear matrix [GO:0016363]; nucleus [GO:0005634]; ruffle membrane [GO:0032587]; vesicle [GO:0031982]	actin cytoskeleton [GO:0015629]; cytoplasm [GO:0005737]; cytosol [GO:0005829]; extracellular exosome [GO:0070062]; extracellular space [GO:0005615]; focal adhesion [GO:0005925]; growth cone [GO:0030426]; lamellipodium [GO:0030027]; lamellipodium membrane [GO:0031258]; membrane [GO:0016020]; nuclear matrix [GO:0016363]; nucleus [GO:0005634]; ruffle membrane [GO:0032587]; vesicle [GO:0031982]; acti…	actin filament binding [GO:0051015]	GO:0000281; GO:0005615; GO:0005634; GO:0005737; GO:0005829; GO:0005925; GO:0007010; GO:0007266; GO:0009615; GO:0015629; GO:0016020; GO:0016363; GO:0022604; GO:0030027; GO:0030036; GO:0030042; GO:0030043; GO:0030426; GO:0031258; GO:0031982; GO:0032587; GO:0040019; GO:0043066; GO:0044794; GO:0051014; GO:0051015; GO:0051293; GO:0061001; GO:0070062
sp|P35527|K1C9_HUMAN	K1C9_HUMAN	194410000	239200000	44225000	123070000	325350000	178800000	247990000	261640000	64304000	206470000	246240000	160630000	12	1.91027e+08	8.26789e+07	P35527	Keratin, type I cytoskeletal 9 (Cytokeratin-9) (CK-9) (Keratin-9) (K9)	epidermis development [GO:0008544]; epithelial cell differentiation [GO:0030855]; intermediate filament organization [GO:0045109]; skin development [GO:0043588]; spermatogenesis [GO:0007283]	cytosol [GO:0005829]; extracellular exosome [GO:0070062]; extracellular space [GO:0005615]; keratin filament [GO:0045095]; membrane [GO:0016020]; nucleus [GO:0005634]	cytosol [GO:0005829]; extracellular exosome [GO:0070062]; extracellular space [GO:0005615]; keratin filament [GO:0045095]; membrane [GO:0016020]; nucleus [GO:0005634]; structural constituent of cytoskeleton [GO:0005200]; epidermis development [GO:0008544]; epithelial cell differentiation [GO:0030855]; intermediate filament organization [GO:0045109]; skin development [GO:0043588]; spermatogenesis …	structural constituent of cytoskeleton [GO:0005200]	GO:0005200; GO:0005615; GO:0005634; GO:0005829; GO:0007283; GO:0008544; GO:0016020; GO:0030855; GO:0043588; GO:0045095; GO:0045109; GO:0070062
sp|P68431|H31_HUMAN	H31_HUMAN	69459000	85547000	9729400	118040000	94440000	261900000	386870000	588360000	40053000	290760000	189830000	140930000	12	1.8966e+08	1.6785e+08	P68431	Histone H3.1 (Histone H3/a) (Histone H3/b) (Histone H3/c) (Histone H3/d) (Histone H3/f) (Histone H3/h) (Histone H3/i) (Histone H3/j) (Histone H3/k) (Histone H3/l)	epigenetic regulation of gene expression [GO:0040029]; gene expression [GO:0010467]; nucleosome assembly [GO:0006334]; telomere organization [GO:0032200]	extracellular exosome [GO:0070062]; extracellular region [GO:0005576]; membrane [GO:0016020]; nucleoplasm [GO:0005654]; nucleosome [GO:0000786]; nucleus [GO:0005634]; protein-containing complex [GO:0032991]	extracellular exosome [GO:0070062]; extracellular region [GO:0005576]; membrane [GO:0016020]; nucleoplasm [GO:0005654]; nucleosome [GO:0000786]; nucleus [GO:0005634]; protein-containing complex [GO:0032991]; cadherin binding [GO:0045296]; DNA binding [GO:0003677]; protein heterodimerization activity [GO:0046982]; structural constituent of chromatin [GO:0030527]; epigenetic regulation of gene expr…	cadherin binding [GO:0045296]; DNA binding [GO:0003677]; protein heterodimerization activity [GO:0046982]; structural constituent of chromatin [GO:0030527]	GO:0000786; GO:0003677; GO:0005576; GO:0005634; GO:0005654; GO:0006334; GO:0010467; GO:0016020; GO:0030527; GO:0032200; GO:0032991; GO:0040029; GO:0045296; GO:0046982; GO:0070062
sp|P32969|RL9_HUMAN	RL9_HUMAN	192450000	102720000	16467000	111660000	120630000	175100000	275460000	323850000	32953000	99547000	289390000	209210000	12	1.62453e+08	9.91395e+07	P32969	60S ribosomal protein L9 (Large ribosomal subunit protein uL6)	cytoplasmic translation [GO:0002181]; translation [GO:0006412]	cytoplasm [GO:0005737]; cytosol [GO:0005829]; cytosolic large ribosomal subunit [GO:0022625]; cytosolic ribosome [GO:0022626]; focal adhesion [GO:0005925]; membrane [GO:0016020]; nucleus [GO:0005634]; ribosome [GO:0005840]	cytoplasm [GO:0005737]; cytosol [GO:0005829]; cytosolic large ribosomal subunit [GO:0022625]; cytosolic ribosome [GO:0022626]; focal adhesion [GO:0005925]; membrane [GO:0016020]; nucleus [GO:0005634]; ribosome [GO:0005840]; RNA binding [GO:0003723]; rRNA binding [GO:0019843]; structural constituent of ribosome [GO:0003735]; cytoplasmic translation [GO:0002181]; translation [GO:0006412]	RNA binding [GO:0003723]; rRNA binding [GO:0019843]; structural constituent of ribosome [GO:0003735]	GO:0002181; GO:0003723; GO:0003735; GO:0005634; GO:0005737; GO:0005829; GO:0005840; GO:0005925; GO:0006412; GO:0016020; GO:0019843; GO:0022625; GO:0022626
sp|P62937|PPIA_HUMAN	PPIA_HUMAN	96590000	111040000	18458000	145060000	125530000	225990000	228080000	156370000	68500000	375770000	131370000	180980000	12	155311500	9.18453e+07	P62937	Peptidyl-prolyl cis-trans isomerase A (PPIase A) (EC 5.2.1.8) (Cyclophilin A) (Cyclosporin A-binding protein) (Rotamase A) [Cleaved into: Peptidyl-prolyl cis-trans isomerase A, N-terminally processed]	activation of protein kinase B activity [GO:0032148]; apoptotic process [GO:0006915]; cell adhesion molecule production [GO:0060352]; cellular response to oxidative stress [GO:0034599]; endothelial cell activation [GO:0042118]; leukocyte chemotaxis [GO:0030595]; lipid droplet organization [GO:0034389]; negative regulation of oxidative stress-induced intrinsic apoptotic signaling pathway [GO:19021…	cytoplasm [GO:0005737]; cytosol [GO:0005829]; extracellular exosome [GO:0070062]; extracellular region [GO:0005576]; extracellular space [GO:0005615]; ficolin-1-rich granule lumen [GO:1904813]; focal adhesion [GO:0005925]; membrane [GO:0016020]; nucleus [GO:0005634]; protein-containing complex [GO:0032991]; secretory granule lumen [GO:0034774]; vesicle [GO:0031982]	cytoplasm [GO:0005737]; cytosol [GO:0005829]; extracellular exosome [GO:0070062]; extracellular region [GO:0005576]; extracellular space [GO:0005615]; ficolin-1-rich granule lumen [GO:1904813]; focal adhesion [GO:0005925]; membrane [GO:0016020]; nucleus [GO:0005634]; protein-containing complex [GO:0032991]; secretory granule lumen [GO:0034774]; vesicle [GO:0031982]; cyclosporin A binding [GO:0016…	cyclosporin A binding [GO:0016018]; heparan sulfate binding [GO:1904399]; integrin binding [GO:0005178]; peptidyl-prolyl cis-trans isomerase activity [GO:0003755]; RNA binding [GO:0003723]; unfolded protein binding [GO:0051082]; virion binding [GO:0046790]	GO:0000413; GO:0001933; GO:0001934; GO:0003723; GO:0003755; GO:0005178; GO:0005576; GO:0005615; GO:0005634; GO:0005737; GO:0005829; GO:0005925; GO:0006457; GO:0006469; GO:0006915; GO:0016018; GO:0016020; GO:0019076; GO:0030168; GO:0030593; GO:0030595; GO:0031982; GO:0032148; GO:0032873; GO:0032991; GO:0034389; GO:0034599; GO:0034774; GO:0035307; GO:0042118; GO:0043410; GO:0045069; GO:0045070; GO:…
sp|P08708|RS17_HUMAN	RS17_HUMAN	145020000	132000000	10139000	149940000	203120000	222320000	210750000	122060000	19179000	178200000	261570000	201270000	12	1.54631e+08	7.69661e+07	P08708	40S ribosomal protein S17 (Small ribosomal subunit protein eS17)	cytoplasmic translation [GO:0002181]; erythrocyte homeostasis [GO:0034101]; ribosomal small subunit biogenesis [GO:0042274]; rRNA processing [GO:0006364]; translation [GO:0006412]; translational initiation [GO:0006413]	cytoplasm [GO:0005737]; cytosol [GO:0005829]; cytosolic ribosome [GO:0022626]; cytosolic small ribosomal subunit [GO:0022627]; focal adhesion [GO:0005925]; membrane [GO:0016020]; nucleolus [GO:0005730]; nucleoplasm [GO:0005654]; ribosome [GO:0005840]; small-subunit processome [GO:0032040]; synapse [GO:0045202]	cytoplasm [GO:0005737]; cytosol [GO:0005829]; cytosolic ribosome [GO:0022626]; cytosolic small ribosomal subunit [GO:0022627]; focal adhesion [GO:0005925]; membrane [GO:0016020]; nucleolus [GO:0005730]; nucleoplasm [GO:0005654]; ribosome [GO:0005840]; small-subunit processome [GO:0032040]; synapse [GO:0045202]; RNA binding [GO:0003723]; structural constituent of ribosome [GO:0003735]; cytoplasmic…	RNA binding [GO:0003723]; structural constituent of ribosome [GO:0003735]	GO:0002181; GO:0003723; GO:0003735; GO:0005654; GO:0005730; GO:0005737; GO:0005829; GO:0005840; GO:0005925; GO:0006364; GO:0006412; GO:0006413; GO:0016020; GO:0022626; GO:0022627; GO:0032040; GO:0034101; GO:0042274; GO:0045202
sp|P50454|SERPH_HUMAN	SERPH_HUMAN	104450000	158090000	3736500	135010000	126580000	130990000	221380000	108870000	3581500	351940000	254650000	185330000	12	1.48717e+08	9.80968e+07	P50454	Serpin H1 (47 kDa heat shock protein) (Arsenic-transactivated protein 3) (AsTP3) (Cell proliferation-inducing gene 14 protein) (Collagen-binding protein) (Colligin) (Rheumatoid arthritis-related antigen RA-A47)	chondrocyte development involved in endochondral bone morphogenesis [GO:0003433]; collagen biosynthetic process [GO:0032964]; collagen fibril organization [GO:0030199]; negative regulation of endopeptidase activity [GO:0010951]; protein maturation [GO:0051604]; response to unfolded protein [GO:0006986]	collagen-containing extracellular matrix [GO:0062023]; endoplasmic reticulum [GO:0005783]; endoplasmic reticulum lumen [GO:0005788]; endoplasmic reticulum-Golgi intermediate compartment [GO:0005793]; extracellular space [GO:0005615]; membrane raft [GO:0045121]	collagen-containing extracellular matrix [GO:0062023]; endoplasmic reticulum [GO:0005783]; endoplasmic reticulum lumen [GO:0005788]; endoplasmic reticulum-Golgi intermediate compartment [GO:0005793]; extracellular space [GO:0005615]; membrane raft [GO:0045121]; collagen binding [GO:0005518]; RNA binding [GO:0003723]; serine-type endopeptidase inhibitor activity [GO:0004867]; unfolded protein bind…	collagen binding [GO:0005518]; RNA binding [GO:0003723]; serine-type endopeptidase inhibitor activity [GO:0004867]; unfolded protein binding [GO:0051082]	GO:0003433; GO:0003723; GO:0004867; GO:0005518; GO:0005615; GO:0005783; GO:0005788; GO:0005793; GO:0006986; GO:0010951; GO:0030199; GO:0032964; GO:0045121; GO:0051082; GO:0051604; GO:0062023
sp|P60866|RS20_HUMAN	RS20_HUMAN	76590000	41624000	6604300	133250000	176780000	347540000	245060000	267200000	9630500	261830000	87299000	42891000	12	1.41358e+08	1.15682e+08	P60866	40S ribosomal protein S20 (Small ribosomal subunit protein uS10)	cytoplasmic translation [GO:0002181]; positive regulation of signal transduction by p53 class mediator [GO:1901798]; translation [GO:0006412]	cytoplasm [GO:0005737]; cytosol [GO:0005829]; cytosolic ribosome [GO:0022626]; cytosolic small ribosomal subunit [GO:0022627]; extracellular exosome [GO:0070062]; membrane [GO:0016020]; nucleoplasm [GO:0005654]; synapse [GO:0045202]	cytoplasm [GO:0005737]; cytosol [GO:0005829]; cytosolic ribosome [GO:0022626]; cytosolic small ribosomal subunit [GO:0022627]; extracellular exosome [GO:0070062]; membrane [GO:0016020]; nucleoplasm [GO:0005654]; synapse [GO:0045202]; MDM2/MDM4 family protein binding [GO:0097371]; RNA binding [GO:0003723]; structural constituent of ribosome [GO:0003735]; ubiquitin ligase inhibitor activity [GO:199…	MDM2/MDM4 family protein binding [GO:0097371]; RNA binding [GO:0003723]; structural constituent of ribosome [GO:0003735]; ubiquitin ligase inhibitor activity [GO:1990948]	GO:0002181; GO:0003723; GO:0003735; GO:0005654; GO:0005737; GO:0005829; GO:0006412; GO:0016020; GO:0022626; GO:0022627; GO:0045202; GO:0070062; GO:0097371; GO:1901798; GO:1990948
sp|P62249|RS16_HUMAN	RS16_HUMAN	80681000	77572000	4599000	106600000	214200000	268390000	246430000	268360000	8026900	185660000	138340000	84537000	12	1.40283e+08	9.49823e+07	P62249	40S ribosomal protein S16 (Small ribosomal subunit protein uS9)	cellular response to leukemia inhibitory factor [GO:1990830]; cytoplasmic translation [GO:0002181]; maturation of SSU-rRNA from tricistronic rRNA transcript (SSU-rRNA, 5.8S rRNA, LSU-rRNA) [GO:0000462]; ribosomal small subunit biogenesis [GO:0042274]; rRNA processing [GO:0006364]; translation [GO:0006412]	cytoplasm [GO:0005737]; cytosol [GO:0005829]; cytosolic ribosome [GO:0022626]; cytosolic small ribosomal subunit [GO:0022627]; extracellular exosome [GO:0070062]; focal adhesion [GO:0005925]; membrane [GO:0016020]; nucleolus [GO:0005730]; nucleoplasm [GO:0005654]; small ribosomal subunit [GO:0015935]; small-subunit processome [GO:0032040]; synapse [GO:0045202]	cytoplasm [GO:0005737]; cytosol [GO:0005829]; cytosolic ribosome [GO:0022626]; cytosolic small ribosomal subunit [GO:0022627]; extracellular exosome [GO:0070062]; focal adhesion [GO:0005925]; membrane [GO:0016020]; nucleolus [GO:0005730]; nucleoplasm [GO:0005654]; small ribosomal subunit [GO:0015935]; small-subunit processome [GO:0032040]; synapse [GO:0045202]; RNA binding [GO:0003723]; structura…	RNA binding [GO:0003723]; structural constituent of ribosome [GO:0003735]	GO:0000462; GO:0002181; GO:0003723; GO:0003735; GO:0005654; GO:0005730; GO:0005737; GO:0005829; GO:0005925; GO:0006364; GO:0006412; GO:0015935; GO:0016020; GO:0022626; GO:0022627; GO:0032040; GO:0042274; GO:0045202; GO:0070062; GO:1990830
sp|P62899|RL31_HUMAN	RL31_HUMAN	167700000	131320000	20727000	101170000	153770000	141590000	163290000	278000000	40317000	111350000	193160000	174410000	12	1.39734e+08	6.81721e+07	P62899	60S ribosomal protein L31 (Large ribosomal subunit protein eL31)	cytoplasmic translation [GO:0002181]; translation [GO:0006412]	cytoplasm [GO:0005737]; cytosol [GO:0005829]; cytosolic large ribosomal subunit [GO:0022625]; cytosolic ribosome [GO:0022626]; extracellular exosome [GO:0070062]; focal adhesion [GO:0005925]; membrane [GO:0016020]; polysomal ribosome [GO:0042788]	cytoplasm [GO:0005737]; cytosol [GO:0005829]; cytosolic large ribosomal subunit [GO:0022625]; cytosolic ribosome [GO:0022626]; extracellular exosome [GO:0070062]; focal adhesion [GO:0005925]; membrane [GO:0016020]; polysomal ribosome [GO:0042788]; RNA binding [GO:0003723]; structural constituent of ribosome [GO:0003735]; cytoplasmic translation [GO:0002181]; translation [GO:0006412]	RNA binding [GO:0003723]; structural constituent of ribosome [GO:0003735]	GO:0002181; GO:0003723; GO:0003735; GO:0005737; GO:0005829; GO:0005925; GO:0006412; GO:0016020; GO:0022625; GO:0022626; GO:0042788; GO:0070062
sp|P06748|NPM_HUMAN	NPM_HUMAN	153500000	116210000	59099000	98488000	65251000	161780000	242920000	325720000	33015000	164110000	135630000	89207000	12	137077500	8.23994e+07	P06748	Nucleophosmin (NPM) (Nucleolar phosphoprotein B23) (Nucleolar protein NO38) (Numatrin)	cellular response to UV [GO:0034644]; cellular senescence [GO:0090398]; centrosome cycle [GO:0007098]; chromatin remodeling [GO:0006338]; DNA repair [GO:0006281]; intracellular protein transport [GO:0006886]; negative regulation of apoptotic process [GO:0043066]; negative regulation of cell population proliferation [GO:0008285]; negative regulation of centrosome duplication [GO:0010826]; negative…	centrosome [GO:0005813]; cytoplasm [GO:0005737]; cytosol [GO:0005829]; focal adhesion [GO:0005925]; granular component [GO:0001652]; membrane [GO:0016020]; nucleolus [GO:0005730]; nucleoplasm [GO:0005654]; nucleus [GO:0005634]; protein-containing complex [GO:0032991]; protein-DNA complex [GO:0032993]; ribonucleoprotein complex [GO:1990904]; spindle pole centrosome [GO:0031616]	centrosome [GO:0005813]; cytoplasm [GO:0005737]; cytosol [GO:0005829]; focal adhesion [GO:0005925]; granular component [GO:0001652]; membrane [GO:0016020]; nucleolus [GO:0005730]; nucleoplasm [GO:0005654]; nucleus [GO:0005634]; protein-containing complex [GO:0032991]; protein-DNA complex [GO:0032993]; ribonucleoprotein complex [GO:1990904]; spindle pole centrosome [GO:0031616]; chromatin binding …	chromatin binding [GO:0003682]; core promoter sequence-specific DNA binding [GO:0001046]; DNA-binding transcription factor binding [GO:0140297]; histone binding [GO:0042393]; molecular condensate scaffold activity [GO:0140693]; NF-kappaB binding [GO:0051059]; protein homodimerization activity [GO:0042803]; protein kinase binding [GO:0019901]; protein kinase inhibitor activity [GO:0004860]; riboso…	GO:0000055; GO:0000056; GO:0001046; GO:0001652; GO:0003682; GO:0003713; GO:0003723; GO:0004860; GO:0005634; GO:0005654; GO:0005730; GO:0005737; GO:0005813; GO:0005829; GO:0005925; GO:0006281; GO:0006334; GO:0006338; GO:0006407; GO:0006886; GO:0006913; GO:0007098; GO:0007165; GO:0008104; GO:0008284; GO:0008285; GO:0010824; GO:0010826; GO:0016020; GO:0019843; GO:0019901; GO:0030957; GO:0031616; GO:…
sp|P62081|RS7_HUMAN	RS7_HUMAN	214120000	138760000	29189000	137100000	71596000	135760000	169960000	173440000	48680000	94396000	279340000	136700000	12	1.35753e+08	7.01459e+07	P62081	40S ribosomal protein S7 (Small ribosomal subunit protein eS7)	cytoplasmic translation [GO:0002181]; negative regulation of ubiquitin protein ligase activity [GO:1904667]; negative regulation of ubiquitin-dependent protein catabolic process [GO:2000059]; neural crest cell differentiation [GO:0014033]; neural tube closure [GO:0001843]; positive regulation of gene expression [GO:0010628]; positive regulation of intrinsic apoptotic signaling pathway by p53 clas…	cytoplasm [GO:0005737]; cytosol [GO:0005829]; cytosolic ribosome [GO:0022626]; cytosolic small ribosomal subunit [GO:0022627]; focal adhesion [GO:0005925]; membrane [GO:0016020]; microtubule organizing center [GO:0005815]; nucleolus [GO:0005730]; nucleoplasm [GO:0005654]; nucleus [GO:0005634]; protein-containing complex [GO:0032991]; ribonucleoprotein complex [GO:1990904]; ribosome [GO:0005840]; …	cytoplasm [GO:0005737]; cytosol [GO:0005829]; cytosolic ribosome [GO:0022626]; cytosolic small ribosomal subunit [GO:0022627]; focal adhesion [GO:0005925]; membrane [GO:0016020]; microtubule organizing center [GO:0005815]; nucleolus [GO:0005730]; nucleoplasm [GO:0005654]; nucleus [GO:0005634]; protein-containing complex [GO:0032991]; ribonucleoprotein complex [GO:1990904]; ribosome [GO:0005840]; …	mRNA 3'-UTR binding [GO:0003730]; mRNA 5'-UTR binding [GO:0048027]; protein kinase binding [GO:0019901]; RNA binding [GO:0003723]; structural constituent of ribosome [GO:0003735]; ubiquitin ligase inhibitor activity [GO:1990948]	GO:0001843; GO:0002181; GO:0003723; GO:0003730; GO:0003735; GO:0005634; GO:0005654; GO:0005730; GO:0005737; GO:0005815; GO:0005829; GO:0005840; GO:0005925; GO:0006364; GO:0006412; GO:0010628; GO:0014033; GO:0016020; GO:0019901; GO:0022626; GO:0022627; GO:0032040; GO:0032991; GO:0042274; GO:0045202; GO:0048027; GO:0050821; GO:1902255; GO:1904667; GO:1990904; GO:1990948; GO:2000059
sp|P29692|EF1D_HUMAN	EF1D_HUMAN	103990000	108010000	68694000	136880000	115030000	168210000	158390000	256030000	69517000	199100000	160770000	60234000	12	1.33738e+08	5.83243e+07	P29692	Elongation factor 1-delta (EF-1-delta) (Antigen NY-CO-4)	cellular response to ionizing radiation [GO:0071479]; mRNA transcription [GO:0009299]; positive regulation of I-kappaB kinase/NF-kappaB signaling [GO:0043123]; regulation of cell death [GO:0010941]; translational elongation [GO:0006414]	cytoplasm [GO:0005737]; cytosol [GO:0005829]; eukaryotic translation elongation factor 1 complex [GO:0005853]; fibrillar center [GO:0001650]; nucleoplasm [GO:0005654]; nucleus [GO:0005634]	cytoplasm [GO:0005737]; cytosol [GO:0005829]; eukaryotic translation elongation factor 1 complex [GO:0005853]; fibrillar center [GO:0001650]; nucleoplasm [GO:0005654]; nucleus [GO:0005634]; cadherin binding [GO:0045296]; DNA binding [GO:0003677]; DNA-binding transcription factor binding [GO:0140297]; guanyl-nucleotide exchange factor activity [GO:0005085]; heat shock protein binding [GO:0031072];…	cadherin binding [GO:0045296]; DNA binding [GO:0003677]; DNA-binding transcription factor binding [GO:0140297]; guanyl-nucleotide exchange factor activity [GO:0005085]; heat shock protein binding [GO:0031072]; translation elongation factor activity [GO:0003746]; translation factor activity, RNA binding [GO:0008135]	GO:0001650; GO:0003677; GO:0003746; GO:0005085; GO:0005634; GO:0005654; GO:0005737; GO:0005829; GO:0005853; GO:0006414; GO:0008135; GO:0009299; GO:0010941; GO:0031072; GO:0043123; GO:0045296; GO:0071479; GO:0140297
sp|P11142|HSP7C_HUMAN	HSP7C_HUMAN	138480000	101190000	20193000	129320000	120630000	162710000	177420000	171320000	26910000	225430000	150880000	178220000	12	1.33559e+08	6.0616e+07	P11142	Heat shock cognate 71 kDa protein (EC 3.6.4.10) (Heat shock 70 kDa protein 8) (Lipopolysaccharide-associated protein 1) (LAP-1) (LPS-associated protein 1)	ATP metabolic process [GO:0046034]; cellular response to starvation [GO:0009267]; cellular response to steroid hormone stimulus [GO:0071383]; chaperone cofactor-dependent protein refolding [GO:0051085]; chaperone-mediated autophagy [GO:0061684]; chaperone-mediated autophagy translocation complex disassembly [GO:1904764]; clathrin coat disassembly [GO:0072318]; late endosomal microautophagy [GO:00…	autophagosome [GO:0005776]; blood microparticle [GO:0072562]; clathrin-sculpted gamma-aminobutyric acid transport vesicle membrane [GO:0061202]; cytoplasm [GO:0005737]; cytosol [GO:0005829]; dendrite [GO:0030425]; extracellular exosome [GO:0070062]; extracellular region [GO:0005576]; extracellular space [GO:0005615]; ficolin-1-rich granule lumen [GO:1904813]; focal adhesion [GO:0005925]; glutamat…	autophagosome [GO:0005776]; blood microparticle [GO:0072562]; clathrin-sculpted gamma-aminobutyric acid transport vesicle membrane [GO:0061202]; cytoplasm [GO:0005737]; cytosol [GO:0005829]; dendrite [GO:0030425]; extracellular exosome [GO:0070062]; extracellular region [GO:0005576]; extracellular space [GO:0005615]; ficolin-1-rich granule lumen [GO:1904813]; focal adhesion [GO:0005925]; glutamat…	ATP binding [GO:0005524]; ATP hydrolysis activity [GO:0016887]; ATP-dependent protein disaggregase activity [GO:0140545]; ATP-dependent protein folding chaperone [GO:0140662]; C3HC4-type RING finger domain binding [GO:0055131]; cadherin binding [GO:0045296]; clathrin-uncoating ATPase activity [GO:1990833]; enzyme binding [GO:0019899]; G protein-coupled receptor binding [GO:0001664]; heat shock pr…	GO:0000398; GO:0000974; GO:0001664; GO:0001786; GO:0003723; GO:0005524; GO:0005576; GO:0005615; GO:0005634; GO:0005654; GO:0005681; GO:0005730; GO:0005737; GO:0005764; GO:0005765; GO:0005770; GO:0005776; GO:0005829; GO:0005886; GO:0005925; GO:0006457; GO:0006986; GO:0009267; GO:0016020; GO:0016887; GO:0019899; GO:0023026; GO:0030425; GO:0030674; GO:0031072; GO:0031625; GO:0031647; GO:0034774; GO:…
sp|P62263|RS14_HUMAN	RS14_HUMAN	68743000	58119000	24907000	71634000	143030000	172180000	175470000	376560000	18031000	159950000	183290000	114630000	12	1.30545e+08	9.75543e+07	P62263	40S ribosomal protein S14 (Small ribosomal subunit protein uS11)	cytoplasmic translation [GO:0002181]; erythrocyte differentiation [GO:0030218]; maturation of SSU-rRNA [GO:0030490]; maturation of SSU-rRNA from tricistronic rRNA transcript (SSU-rRNA, 5.8S rRNA, LSU-rRNA) [GO:0000462]; negative regulation of transcription by RNA polymerase II [GO:0000122]; ribosomal small subunit assembly [GO:0000028]; ribosomal small subunit biogenesis [GO:0042274]; translation…	cytoplasm [GO:0005737]; cytosol [GO:0005829]; cytosolic ribosome [GO:0022626]; cytosolic small ribosomal subunit [GO:0022627]; extracellular exosome [GO:0070062]; focal adhesion [GO:0005925]; membrane [GO:0016020]; nucleolus [GO:0005730]; nucleoplasm [GO:0005654]; postsynaptic density [GO:0014069]; small-subunit processome [GO:0032040]	cytoplasm [GO:0005737]; cytosol [GO:0005829]; cytosolic ribosome [GO:0022626]; cytosolic small ribosomal subunit [GO:0022627]; extracellular exosome [GO:0070062]; focal adhesion [GO:0005925]; membrane [GO:0016020]; nucleolus [GO:0005730]; nucleoplasm [GO:0005654]; postsynaptic density [GO:0014069]; small-subunit processome [GO:0032040]; mRNA 5'-UTR binding [GO:0048027]; RNA binding [GO:0003723]; …	mRNA 5'-UTR binding [GO:0048027]; RNA binding [GO:0003723]; small ribosomal subunit rRNA binding [GO:0070181]; structural constituent of ribosome [GO:0003735]; translation regulator activity [GO:0045182]	GO:0000028; GO:0000122; GO:0000462; GO:0002181; GO:0003723; GO:0003735; GO:0005654; GO:0005730; GO:0005737; GO:0005829; GO:0005925; GO:0006412; GO:0014069; GO:0016020; GO:0022626; GO:0022627; GO:0030218; GO:0030490; GO:0032040; GO:0042274; GO:0045182; GO:0048027; GO:0070062; GO:0070181
sp|P08865|RSSA_HUMAN	RSSA_HUMAN	121470000	119640000	37904000	113470000	143010000	118100000	105220000	103900000	168520000	104270000	281190000	131570000	12	129022000	5.68382e+07	P08865	40S ribosomal protein SA (37 kDa laminin receptor precursor) (37LRP) (37/67 kDa laminin receptor) (LRP/LR) (67 kDa laminin receptor) (67LR) (Colon carcinoma laminin-binding protein) (Laminin receptor 1) (LamR) (Laminin-binding protein precursor p40) (LBP/p40) (Multidrug resistance-associated protein MGr1-Ag) (NEM/1CHD4) (Small ribosomal subunit protein uS2)	cell adhesion [GO:0007155]; cytoplasmic translation [GO:0002181]; ribosomal small subunit assembly [GO:0000028]; translation [GO:0006412]	cytoplasm [GO:0005737]; cytosol [GO:0005829]; cytosolic ribosome [GO:0022626]; cytosolic small ribosomal subunit [GO:0022627]; extracellular exosome [GO:0070062]; membrane [GO:0016020]; nucleoplasm [GO:0005654]; nucleus [GO:0005634]; plasma membrane [GO:0005886]	cytoplasm [GO:0005737]; cytosol [GO:0005829]; cytosolic ribosome [GO:0022626]; cytosolic small ribosomal subunit [GO:0022627]; extracellular exosome [GO:0070062]; membrane [GO:0016020]; nucleoplasm [GO:0005654]; nucleus [GO:0005634]; plasma membrane [GO:0005886]; laminin binding [GO:0043236]; laminin receptor activity [GO:0005055]; ribosome binding [GO:0043022]; RNA binding [GO:0003723]; structur…	laminin binding [GO:0043236]; laminin receptor activity [GO:0005055]; ribosome binding [GO:0043022]; RNA binding [GO:0003723]; structural constituent of ribosome [GO:0003735]; virus receptor activity [GO:0001618]	GO:0000028; GO:0001618; GO:0002181; GO:0003723; GO:0003735; GO:0005055; GO:0005634; GO:0005654; GO:0005737; GO:0005829; GO:0005886; GO:0006412; GO:0007155; GO:0016020; GO:0022626; GO:0022627; GO:0043022; GO:0043236; GO:0070062
sp|P62906|RL10A_HUMAN	RL10A_HUMAN	40626000	42826000	6207100	77547000	134980000	274320000	263970000	261680000	25352000	184650000	117420000	84989000	12	126213925	9.80509e+07	P62906	60S ribosomal protein L10a (CSA-19) (Large ribosomal subunit protein uL1) (Neural precursor cell expressed developmentally down-regulated protein 6) (NEDD-6)	cytoplasmic translation [GO:0002181]; translation [GO:0006412]	cytoplasm [GO:0005737]; cytosol [GO:0005829]; cytosolic large ribosomal subunit [GO:0022625]; cytosolic ribosome [GO:0022626]; extracellular exosome [GO:0070062]; focal adhesion [GO:0005925]; membrane [GO:0016020]; nucleus [GO:0005634]; polysomal ribosome [GO:0042788]	cytoplasm [GO:0005737]; cytosol [GO:0005829]; cytosolic large ribosomal subunit [GO:0022625]; cytosolic ribosome [GO:0022626]; extracellular exosome [GO:0070062]; focal adhesion [GO:0005925]; membrane [GO:0016020]; nucleus [GO:0005634]; polysomal ribosome [GO:0042788]; RNA binding [GO:0003723]; structural constituent of ribosome [GO:0003735]; cytoplasmic translation [GO:0002181]; translation [GO:…	RNA binding [GO:0003723]; structural constituent of ribosome [GO:0003735]	GO:0002181; GO:0003723; GO:0003735; GO:0005634; GO:0005737; GO:0005829; GO:0005925; GO:0006412; GO:0016020; GO:0022625; GO:0022626; GO:0042788; GO:0070062
sp|P10809|CH60_HUMAN	CH60_HUMAN	180830000	160050000	11282000	83252000	43503000	82265000	88273000	69976000	12217000	117050000	331350000	190980000	12	1.14252e+08	9.05516e+07	P10809	60 kDa heat shock protein, mitochondrial (EC 5.6.1.7) (60 kDa chaperonin) (Chaperonin 60) (CPN60) (Heat shock protein 60) (HSP-60) (Hsp60) (HuCHA60) (Mitochondrial matrix protein P1) (P60 lymphocyte protein)	'de novo' protein folding [GO:0006458]; activation of cysteine-type endopeptidase activity involved in apoptotic process [GO:0006919]; apoptotic mitochondrial changes [GO:0008637]; B cell activation [GO:0042113]; B cell proliferation [GO:0042100]; biological process involved in interaction with symbiont [GO:0051702]; cellular response to interleukin-7 [GO:0098761]; chaperone-mediated protein comp…	cell surface [GO:0009986]; clathrin-coated pit [GO:0005905]; coated vesicle [GO:0030135]; cytoplasm [GO:0005737]; cytosol [GO:0005829]; early endosome [GO:0005769]; extracellular exosome [GO:0070062]; extracellular space [GO:0005615]; lipopolysaccharide receptor complex [GO:0046696]; membrane [GO:0016020]; migrasome [GO:0140494]; mitochondrial inner membrane [GO:0005743]; mitochondrial matrix [GO…	cell surface [GO:0009986]; clathrin-coated pit [GO:0005905]; coated vesicle [GO:0030135]; cytoplasm [GO:0005737]; cytosol [GO:0005829]; early endosome [GO:0005769]; extracellular exosome [GO:0070062]; extracellular space [GO:0005615]; lipopolysaccharide receptor complex [GO:0046696]; membrane [GO:0016020]; migrasome [GO:0140494]; mitochondrial inner membrane [GO:0005743]; mitochondrial matrix [GO…	apolipoprotein A-I binding [GO:0034186]; apolipoprotein binding [GO:0034185]; ATP binding [GO:0005524]; ATP hydrolysis activity [GO:0016887]; ATP-dependent protein folding chaperone [GO:0140662]; DNA replication origin binding [GO:0003688]; double-stranded RNA binding [GO:0003725]; enzyme binding [GO:0019899]; high-density lipoprotein particle binding [GO:0008035]; isomerase activity [GO:0016853]…	GO:0001530; GO:0002039; GO:0002755; GO:0002842; GO:0003688; GO:0003697; GO:0003723; GO:0003725; GO:0005524; GO:0005615; GO:0005737; GO:0005739; GO:0005743; GO:0005759; GO:0005769; GO:0005829; GO:0005886; GO:0005905; GO:0006457; GO:0006458; GO:0006919; GO:0006986; GO:0008035; GO:0008637; GO:0009409; GO:0009986; GO:0016020; GO:0016853; GO:0016887; GO:0019899; GO:0030135; GO:0030141; GO:0031625; GO:…
sp|Q07020|RL18_HUMAN	RL18_HUMAN	76257000	73345000	15542000	59848000	166710000	121730000	189450000	238330000	51158000	83939000	157550000	88978000	12	1.10236e+08	6.52952e+07	Q07020	60S ribosomal protein L18 (Large ribosomal subunit protein eL18)	cytoplasmic translation [GO:0002181]; translation [GO:0006412]	cytoplasm [GO:0005737]; cytosol [GO:0005829]; cytosolic large ribosomal subunit [GO:0022625]; cytosolic ribosome [GO:0022626]; endoplasmic reticulum [GO:0005783]; focal adhesion [GO:0005925]; membrane [GO:0016020]; nucleolus [GO:0005730]; nucleus [GO:0005634]; polysomal ribosome [GO:0042788]; rough endoplasmic reticulum [GO:0005791]	cytoplasm [GO:0005737]; cytosol [GO:0005829]; cytosolic large ribosomal subunit [GO:0022625]; cytosolic ribosome [GO:0022626]; endoplasmic reticulum [GO:0005783]; focal adhesion [GO:0005925]; membrane [GO:0016020]; nucleolus [GO:0005730]; nucleus [GO:0005634]; polysomal ribosome [GO:0042788]; rough endoplasmic reticulum [GO:0005791]; RNA binding [GO:0003723]; structural constituent of ribosome [G…	RNA binding [GO:0003723]; structural constituent of ribosome [GO:0003735]	GO:0002181; GO:0003723; GO:0003735; GO:0005634; GO:0005730; GO:0005737; GO:0005783; GO:0005791; GO:0005829; GO:0005925; GO:0006412; GO:0016020; GO:0022625; GO:0022626; GO:0042788
sp|P26373|RL13_HUMAN	RL13_HUMAN	36174000	32286000	8700300	61711000	137400000	201660000	239340000	285930000	18712000	133790000	90854000	68616000	12	109597775	9.13994e+07	P26373	60S ribosomal protein L13 (Breast basic conserved protein 1) (Large ribosomal subunit protein eL13)	blastocyst development [GO:0001824]; bone development [GO:0060348]; cytoplasmic translation [GO:0002181]; translation [GO:0006412]	cytoplasm [GO:0005737]; cytosol [GO:0005829]; cytosolic large ribosomal subunit [GO:0022625]; cytosolic ribosome [GO:0022626]; endoplasmic reticulum [GO:0005783]; membrane [GO:0016020]; nucleolus [GO:0005730]; nucleus [GO:0005634]; synapse [GO:0045202]	cytoplasm [GO:0005737]; cytosol [GO:0005829]; cytosolic large ribosomal subunit [GO:0022625]; cytosolic ribosome [GO:0022626]; endoplasmic reticulum [GO:0005783]; membrane [GO:0016020]; nucleolus [GO:0005730]; nucleus [GO:0005634]; synapse [GO:0045202]; RNA binding [GO:0003723]; structural constituent of ribosome [GO:0003735]; blastocyst development [GO:0001824]; bone development [GO:0060348]; cy…	RNA binding [GO:0003723]; structural constituent of ribosome [GO:0003735]	GO:0001824; GO:0002181; GO:0003723; GO:0003735; GO:0005634; GO:0005730; GO:0005737; GO:0005783; GO:0005829; GO:0006412; GO:0016020; GO:0022625; GO:0022626; GO:0045202; GO:0060348
sp|P18124|RL7_HUMAN	RL7_HUMAN	45279000	42172000	13748000	61925000	111290000	137520000	238300000	340340000	32407000	104250000	94466000	79229000	12	108410500	9.43172e+07	P18124	60S ribosomal protein L7 (Large ribosomal subunit protein uL30)	cytoplasmic translation [GO:0002181]; maturation of LSU-rRNA from tricistronic rRNA transcript (SSU-rRNA, 5.8S rRNA, LSU-rRNA) [GO:0000463]; ribosomal large subunit biogenesis [GO:0042273]; rRNA processing [GO:0006364]; translation [GO:0006412]	cytoplasm [GO:0005737]; cytosol [GO:0005829]; cytosolic large ribosomal subunit [GO:0022625]; cytosolic ribosome [GO:0022626]; focal adhesion [GO:0005925]; membrane [GO:0016020]; nucleolus [GO:0005730]; nucleus [GO:0005634]; postsynaptic density [GO:0014069]; ribonucleoprotein complex [GO:1990904]	cytoplasm [GO:0005737]; cytosol [GO:0005829]; cytosolic large ribosomal subunit [GO:0022625]; cytosolic ribosome [GO:0022626]; focal adhesion [GO:0005925]; membrane [GO:0016020]; nucleolus [GO:0005730]; nucleus [GO:0005634]; postsynaptic density [GO:0014069]; ribonucleoprotein complex [GO:1990904]; DNA binding [GO:0003677]; identical protein binding [GO:0042802]; mRNA binding [GO:0003729]; RNA bi…	DNA binding [GO:0003677]; identical protein binding [GO:0042802]; mRNA binding [GO:0003729]; RNA binding [GO:0003723]; structural constituent of ribosome [GO:0003735]	GO:0000463; GO:0002181; GO:0003677; GO:0003723; GO:0003729; GO:0003735; GO:0005634; GO:0005730; GO:0005737; GO:0005829; GO:0005925; GO:0006364; GO:0006412; GO:0014069; GO:0016020; GO:0022625; GO:0022626; GO:0042273; GO:0042802; GO:1990904
sp|P08758|ANXA5_HUMAN	ANXA5_HUMAN	88125000	131610000	71363000	69657000	133620000	146990000	60137000	37722000	79030000	151780000	176630000	131730000	12	1.06533e+08	4.38745e+07	P08758	Annexin A5 (Anchorin CII) (Annexin V) (Annexin-5) (Calphobindin I) (CBP-I) (Endonexin II) (Lipocortin V) (Placental anticoagulant protein 4) (PP4) (Placental anticoagulant protein I) (PAP-I) (Thromboplastin inhibitor) (Vascular anticoagulant-alpha) (VAC-alpha)	blood coagulation [GO:0007596]; negative regulation of apoptotic process [GO:0043066]; negative regulation of coagulation [GO:0050819]; response to organic substance [GO:0010033]; signal transduction [GO:0007165]	collagen-containing extracellular matrix [GO:0062023]; cytoplasm [GO:0005737]; cytosol [GO:0005829]; endothelial microparticle [GO:0072563]; external side of plasma membrane [GO:0009897]; extracellular exosome [GO:0070062]; extracellular region [GO:0005576]; focal adhesion [GO:0005925]; membrane [GO:0016020]	collagen-containing extracellular matrix [GO:0062023]; cytoplasm [GO:0005737]; cytosol [GO:0005829]; endothelial microparticle [GO:0072563]; external side of plasma membrane [GO:0009897]; extracellular exosome [GO:0070062]; extracellular region [GO:0005576]; focal adhesion [GO:0005925]; membrane [GO:0016020]; calcium ion binding [GO:0005509]; calcium-dependent phospholipid binding [GO:0005544]; p…	calcium ion binding [GO:0005509]; calcium-dependent phospholipid binding [GO:0005544]; phosphatidylserine binding [GO:0001786]; phospholipase inhibitor activity [GO:0004859]; phospholipid binding [GO:0005543]	GO:0001786; GO:0004859; GO:0005509; GO:0005543; GO:0005544; GO:0005576; GO:0005737; GO:0005829; GO:0005925; GO:0007165; GO:0007596; GO:0009897; GO:0010033; GO:0016020; GO:0043066; GO:0050819; GO:0062023; GO:0070062; GO:0072563
sp|P46782|RS5_HUMAN	RS5_HUMAN	114060000	88850000	6166600	82548000	124980000	158290000	132110000	117740000	15121000	112490000	184210000	131900000	12	1.05705e+08	5.21166e+07	P46782	40S ribosomal protein S5 (Small ribosomal subunit protein uS7) [Cleaved into: 40S ribosomal protein S5, N-terminally processed]	cytoplasmic translation [GO:0002181]; regulation of translational fidelity [GO:0006450]; ribosomal small subunit assembly [GO:0000028]; ribosomal small subunit biogenesis [GO:0042274]; translation [GO:0006412]; translational initiation [GO:0006413]	cytoplasm [GO:0005737]; cytosol [GO:0005829]; cytosolic ribosome [GO:0022626]; cytosolic small ribosomal subunit [GO:0022627]; extracellular exosome [GO:0070062]; focal adhesion [GO:0005925]; membrane [GO:0016020]; nucleolus [GO:0005730]; nucleoplasm [GO:0005654]; ribonucleoprotein complex [GO:1990904]; ribosome [GO:0005840]; small-subunit processome [GO:0032040]	cytoplasm [GO:0005737]; cytosol [GO:0005829]; cytosolic ribosome [GO:0022626]; cytosolic small ribosomal subunit [GO:0022627]; extracellular exosome [GO:0070062]; focal adhesion [GO:0005925]; membrane [GO:0016020]; nucleolus [GO:0005730]; nucleoplasm [GO:0005654]; ribonucleoprotein complex [GO:1990904]; ribosome [GO:0005840]; small-subunit processome [GO:0032040]; mRNA binding [GO:0003729]; RNA b…	mRNA binding [GO:0003729]; RNA binding [GO:0003723]; rRNA binding [GO:0019843]; structural constituent of ribosome [GO:0003735]	GO:0000028; GO:0002181; GO:0003723; GO:0003729; GO:0003735; GO:0005654; GO:0005730; GO:0005737; GO:0005829; GO:0005840; GO:0005925; GO:0006412; GO:0006413; GO:0006450; GO:0016020; GO:0019843; GO:0022626; GO:0022627; GO:0032040; GO:0042274; GO:0070062; GO:1990904
sp|P05388|RLA0_HUMAN	RLA0_HUMAN	62285000	59771000	8878100	78726000	135180000	136780000	165210000	266680000	41193000	102010000	128480000	66391000	12	104298675	6.84921e+07	P05388	60S acidic ribosomal protein P0 (60S ribosomal protein L10E) (Large ribosomal subunit protein uL10)	cytoplasmic translation [GO:0002181]; ribosomal large subunit assembly [GO:0000027]; translation [GO:0006412]	cytoplasm [GO:0005737]; cytoplasmic ribonucleoprotein granule [GO:0036464]; cytosol [GO:0005829]; cytosolic large ribosomal subunit [GO:0022625]; cytosolic ribosome [GO:0022626]; endoplasmic reticulum [GO:0005783]; extracellular exosome [GO:0070062]; focal adhesion [GO:0005925]; membrane [GO:0016020]; nucleus [GO:0005634]; postsynapse [GO:0098794]; postsynaptic density [GO:0014069]; ribonucleopro…	cytoplasm [GO:0005737]; cytoplasmic ribonucleoprotein granule [GO:0036464]; cytosol [GO:0005829]; cytosolic large ribosomal subunit [GO:0022625]; cytosolic ribosome [GO:0022626]; endoplasmic reticulum [GO:0005783]; extracellular exosome [GO:0070062]; focal adhesion [GO:0005925]; membrane [GO:0016020]; nucleus [GO:0005634]; postsynapse [GO:0098794]; postsynaptic density [GO:0014069]; ribonucleopro…	large ribosomal subunit rRNA binding [GO:0070180]; RNA binding [GO:0003723]; structural constituent of ribosome [GO:0003735]	GO:0000027; GO:0002181; GO:0003723; GO:0003735; GO:0005634; GO:0005737; GO:0005783; GO:0005829; GO:0005925; GO:0006412; GO:0014069; GO:0016020; GO:0022625; GO:0022626; GO:0036464; GO:0070062; GO:0070180; GO:0098794; GO:1990904
sp|P39019|RS19_HUMAN	RS19_HUMAN	57952000	61852000	1568600	79692000	151870000	142870000	210840000	205950000	4239300	134350000	132900000	63196000	12	1.0394e+08	7.00418e+07	P39019	40S ribosomal protein S19 (Small ribosomal subunit protein eS19)	antimicrobial humoral immune response mediated by antimicrobial peptide [GO:0061844]; cytoplasmic translation [GO:0002181]; defense response to Gram-negative bacterium [GO:0050829]; erythrocyte differentiation [GO:0030218]; killing of cells of another organism [GO:0031640]; maturation of SSU-rRNA [GO:0030490]; maturation of SSU-rRNA from tricistronic rRNA transcript (SSU-rRNA, 5.8S rRNA, LSU-rRNA…	cytoplasm [GO:0005737]; cytosol [GO:0005829]; cytosolic ribosome [GO:0022626]; cytosolic small ribosomal subunit [GO:0022627]; extracellular exosome [GO:0070062]; focal adhesion [GO:0005925]; membrane [GO:0016020]; nucleolus [GO:0005730]; nucleoplasm [GO:0005654]; postsynaptic density [GO:0014069]; ribosome [GO:0005840]; small-subunit processome [GO:0032040]	cytoplasm [GO:0005737]; cytosol [GO:0005829]; cytosolic ribosome [GO:0022626]; cytosolic small ribosomal subunit [GO:0022627]; extracellular exosome [GO:0070062]; focal adhesion [GO:0005925]; membrane [GO:0016020]; nucleolus [GO:0005730]; nucleoplasm [GO:0005654]; postsynaptic density [GO:0014069]; ribosome [GO:0005840]; small-subunit processome [GO:0032040]; fibroblast growth factor binding [GO:…	fibroblast growth factor binding [GO:0017134]; identical protein binding [GO:0042802]; protein kinase binding [GO:0019901]; RNA binding [GO:0003723]; structural constituent of ribosome [GO:0003735]	GO:0000028; GO:0000462; GO:0002181; GO:0002548; GO:0003723; GO:0003735; GO:0005654; GO:0005730; GO:0005737; GO:0005829; GO:0005840; GO:0005925; GO:0006364; GO:0006412; GO:0007000; GO:0009991; GO:0014069; GO:0016020; GO:0017134; GO:0019901; GO:0022626; GO:0022627; GO:0030218; GO:0030490; GO:0031640; GO:0032040; GO:0042274; GO:0042802; GO:0050829; GO:0060265; GO:0060266; GO:0061844; GO:0070062
sp|P63220|RS21_HUMAN	RS21_HUMAN	77535000	77234000	25869000	70996000	166390000	159430000	94965000	95918000	69058000	133900000	132890000	99231000	12	1.00285e+08	4.10423e+07	P63220	40S ribosomal protein S21 (Small ribosomal subunit protein eS21)	cytoplasmic translation [GO:0002181]; endonucleolytic cleavage in ITS1 to separate SSU-rRNA from 5.8S rRNA and LSU-rRNA from tricistronic rRNA transcript (SSU-rRNA, 5.8S rRNA, LSU-rRNA) [GO:0000447]; endonucleolytic cleavage to generate mature 3'-end of SSU-rRNA from (SSU-rRNA, 5.8S rRNA, LSU-rRNA) [GO:0000461]; translation [GO:0006412]	cytoplasm [GO:0005737]; cytosol [GO:0005829]; cytosolic ribosome [GO:0022626]; cytosolic small ribosomal subunit [GO:0022627]; nucleoplasm [GO:0005654]; polysomal ribosome [GO:0042788]; rough endoplasmic reticulum [GO:0005791]; small ribosomal subunit [GO:0015935]; synapse [GO:0045202]	cytoplasm [GO:0005737]; cytosol [GO:0005829]; cytosolic ribosome [GO:0022626]; cytosolic small ribosomal subunit [GO:0022627]; nucleoplasm [GO:0005654]; polysomal ribosome [GO:0042788]; rough endoplasmic reticulum [GO:0005791]; small ribosomal subunit [GO:0015935]; synapse [GO:0045202]; RNA binding [GO:0003723]; structural constituent of ribosome [GO:0003735]; cytoplasmic translation [GO:0002181]…	RNA binding [GO:0003723]; structural constituent of ribosome [GO:0003735]	GO:0000447; GO:0000461; GO:0002181; GO:0003723; GO:0003735; GO:0005654; GO:0005737; GO:0005791; GO:0005829; GO:0006412; GO:0015935; GO:0022626; GO:0022627; GO:0042788; GO:0045202
sp|P09211|GSTP1_HUMAN	GSTP1_HUMAN	72871000	88453000	9590900	118940000	74038000	135940000	125160000	131610000	32261000	166360000	121510000	125980000	12	1.00226e+08	4.58545e+07	P09211	Glutathione S-transferase P (EC 2.5.1.18) (GST class-pi) (GSTP1-1)	cellular response to lipopolysaccharide [GO:0071222]; central nervous system development [GO:0007417]; common myeloid progenitor cell proliferation [GO:0035726]; glutathione derivative biosynthetic process [GO:1901687]; glutathione metabolic process [GO:0006749]; hepoxilin biosynthetic process [GO:0051122]; linoleic acid metabolic process [GO:0043651]; negative regulation of acute inflammatory re…	cytoplasm [GO:0005737]; cytosol [GO:0005829]; extracellular exosome [GO:0070062]; extracellular region [GO:0005576]; extracellular space [GO:0005615]; ficolin-1-rich granule lumen [GO:1904813]; mitochondrion [GO:0005739]; nucleus [GO:0005634]; secretory granule lumen [GO:0034774]; TRAF2-GSTP1 complex [GO:0097057]; vesicle [GO:0031982]	cytoplasm [GO:0005737]; cytosol [GO:0005829]; extracellular exosome [GO:0070062]; extracellular region [GO:0005576]; extracellular space [GO:0005615]; ficolin-1-rich granule lumen [GO:1904813]; mitochondrion [GO:0005739]; nucleus [GO:0005634]; secretory granule lumen [GO:0034774]; TRAF2-GSTP1 complex [GO:0097057]; vesicle [GO:0031982]; dinitrosyl-iron complex binding [GO:0035731]; fatty acid bind…	dinitrosyl-iron complex binding [GO:0035731]; fatty acid binding [GO:0005504]; glutathione peroxidase activity [GO:0004602]; glutathione transferase activity [GO:0004364]; JUN kinase binding [GO:0008432]; kinase regulator activity [GO:0019207]; nitric oxide binding [GO:0070026]; S-nitrosoglutathione binding [GO:0035730]	GO:0000302; GO:0002674; GO:0004364; GO:0004602; GO:0005504; GO:0005576; GO:0005615; GO:0005634; GO:0005737; GO:0005739; GO:0005829; GO:0006469; GO:0006693; GO:0006749; GO:0006805; GO:0007417; GO:0008432; GO:0009890; GO:0010804; GO:0019207; GO:0031982; GO:0032691; GO:0032720; GO:0032872; GO:0032873; GO:0032930; GO:0034774; GO:0035726; GO:0035730; GO:0035731; GO:0035732; GO:0043066; GO:0043124; GO:…
sp|P62277|RS13_HUMAN	RS13_HUMAN	81224000	68444000	9159500	55448000	109350000	120260000	167730000	199730000	29217000	115380000	140940000	67400000	12	9.70235e+07	5.59999e+07	P62277	40S ribosomal protein S13 (Small ribosomal subunit protein uS15)	cytoplasmic translation [GO:0002181]; negative regulation of RNA splicing [GO:0033119]; ribosomal small subunit biogenesis [GO:0042274]; translation [GO:0006412]	cytoplasm [GO:0005737]; cytosol [GO:0005829]; cytosolic ribosome [GO:0022626]; cytosolic small ribosomal subunit [GO:0022627]; extracellular exosome [GO:0070062]; focal adhesion [GO:0005925]; membrane [GO:0016020]; nucleolus [GO:0005730]; nucleoplasm [GO:0005654]; nucleus [GO:0005634]; postsynaptic density [GO:0014069]; ribosome [GO:0005840]; small-subunit processome [GO:0032040]	cytoplasm [GO:0005737]; cytosol [GO:0005829]; cytosolic ribosome [GO:0022626]; cytosolic small ribosomal subunit [GO:0022627]; extracellular exosome [GO:0070062]; focal adhesion [GO:0005925]; membrane [GO:0016020]; nucleolus [GO:0005730]; nucleoplasm [GO:0005654]; nucleus [GO:0005634]; postsynaptic density [GO:0014069]; ribosome [GO:0005840]; small-subunit processome [GO:0032040]; mRNA 5'-UTR bin…	mRNA 5'-UTR binding [GO:0048027]; mRNA binding [GO:0003729]; RNA binding [GO:0003723]; small ribosomal subunit rRNA binding [GO:0070181]; structural constituent of ribosome [GO:0003735]	GO:0002181; GO:0003723; GO:0003729; GO:0003735; GO:0005634; GO:0005654; GO:0005730; GO:0005737; GO:0005829; GO:0005840; GO:0005925; GO:0006412; GO:0014069; GO:0016020; GO:0022626; GO:0022627; GO:0032040; GO:0033119; GO:0042274; GO:0048027; GO:0070062; GO:0070181
sp|P06733|ENOA_HUMAN	ENOA_HUMAN	91437000	75163000	19707000	69616000	50611000	105700000	102230000	201990000	109810000	87201000	117000000	101650000	12	9.43429e+07	4.38041e+07	P06733	Alpha-enolase (EC 4.2.1.11) (2-phospho-D-glycerate hydro-lyase) (C-myc promoter-binding protein) (Enolase 1) (MBP-1) (MPB-1) (Non-neural enolase) (NNE) (Phosphopyruvate hydratase) (Plasminogen-binding protein)	canonical glycolysis [GO:0061621]; gluconeogenesis [GO:0006094]; glycolytic process [GO:0006096]; negative regulation of cell growth [GO:0030308]; negative regulation of DNA-templated transcription [GO:0045892]; negative regulation of hypoxia-induced intrinsic apoptotic signaling pathway [GO:1903298]; negative regulation of transcription by RNA polymerase II [GO:0000122]; positive regulation of A…	cell cortex [GO:0005938]; cell surface [GO:0009986]; cytoplasm [GO:0005737]; cytosol [GO:0005829]; extracellular exosome [GO:0070062]; extracellular space [GO:0005615]; M band [GO:0031430]; membrane [GO:0016020]; nuclear outer membrane [GO:0005640]; nucleus [GO:0005634]; phosphopyruvate hydratase complex [GO:0000015]; plasma membrane [GO:0005886]	cell cortex [GO:0005938]; cell surface [GO:0009986]; cytoplasm [GO:0005737]; cytosol [GO:0005829]; extracellular exosome [GO:0070062]; extracellular space [GO:0005615]; M band [GO:0031430]; membrane [GO:0016020]; nuclear outer membrane [GO:0005640]; nucleus [GO:0005634]; phosphopyruvate hydratase complex [GO:0000015]; plasma membrane [GO:0005886]; cadherin binding [GO:0045296]; DNA-binding transc…	cadherin binding [GO:0045296]; DNA-binding transcription repressor activity, RNA polymerase II-specific [GO:0001227]; GTPase binding [GO:0051020]; magnesium ion binding [GO:0000287]; phosphopyruvate hydratase activity [GO:0004634]; protein homodimerization activity [GO:0042803]; RNA binding [GO:0003723]; RNA polymerase II transcription regulatory region sequence-specific DNA binding [GO:0000977];…	GO:0000015; GO:0000122; GO:0000287; GO:0000977; GO:0001222; GO:0001227; GO:0003714; GO:0003723; GO:0004634; GO:0005615; GO:0005634; GO:0005640; GO:0005737; GO:0005829; GO:0005886; GO:0005938; GO:0006094; GO:0006096; GO:0009615; GO:0009986; GO:0010756; GO:0016020; GO:0030308; GO:0031430; GO:0042803; GO:0045296; GO:0045892; GO:0045933; GO:0051020; GO:0061621; GO:0070062; GO:1903298; GO:2001171
sp|P30050|RL12_HUMAN	RL12_HUMAN	69534000	74227000	7905800	51886000	112880000	97013000	159280000	191280000	27068000	86012000	149710000	97753000	12	93712400	5.38737e+07	P30050	60S ribosomal protein L12 (Large ribosomal subunit protein uL11)	cytoplasmic translation [GO:0002181]; translation [GO:0006412]	cytoplasm [GO:0005737]; cytosol [GO:0005829]; cytosolic large ribosomal subunit [GO:0022625]; cytosolic ribosome [GO:0022626]; extracellular exosome [GO:0070062]; focal adhesion [GO:0005925]; membrane [GO:0016020]; nucleolus [GO:0005730]; postsynaptic density [GO:0014069]	cytoplasm [GO:0005737]; cytosol [GO:0005829]; cytosolic large ribosomal subunit [GO:0022625]; cytosolic ribosome [GO:0022626]; extracellular exosome [GO:0070062]; focal adhesion [GO:0005925]; membrane [GO:0016020]; nucleolus [GO:0005730]; postsynaptic density [GO:0014069]; large ribosomal subunit rRNA binding [GO:0070180]; RNA binding [GO:0003723]; structural constituent of ribosome [GO:0003735];…	large ribosomal subunit rRNA binding [GO:0070180]; RNA binding [GO:0003723]; structural constituent of ribosome [GO:0003735]	GO:0002181; GO:0003723; GO:0003735; GO:0005730; GO:0005737; GO:0005829; GO:0005925; GO:0006412; GO:0014069; GO:0016020; GO:0022625; GO:0022626; GO:0070062; GO:0070180
sp|P62888|RL30_HUMAN	RL30_HUMAN	65981000	55189000	7455000	53089000	105150000	79295000	153480000	227520000	33250000	88601000	141360000	93587000	12	9.19964e+07	5.96016e+07	P62888	60S ribosomal protein L30 (Large ribosomal subunit protein eL30)	antimicrobial humoral immune response mediated by antimicrobial peptide [GO:0061844]; cytoplasmic translation [GO:0002181]; defense response to Gram-negative bacterium [GO:0050829]; killing of cells of another organism [GO:0031640]; translation [GO:0006412]	cytoplasm [GO:0005737]; cytosol [GO:0005829]; cytosolic large ribosomal subunit [GO:0022625]; cytosolic ribosome [GO:0022626]; extracellular exosome [GO:0070062]; focal adhesion [GO:0005925]; membrane [GO:0016020]; nucleus [GO:0005634]; polysomal ribosome [GO:0042788]; postsynaptic density [GO:0014069]	cytoplasm [GO:0005737]; cytosol [GO:0005829]; cytosolic large ribosomal subunit [GO:0022625]; cytosolic ribosome [GO:0022626]; extracellular exosome [GO:0070062]; focal adhesion [GO:0005925]; membrane [GO:0016020]; nucleus [GO:0005634]; polysomal ribosome [GO:0042788]; postsynaptic density [GO:0014069]; RNA binding [GO:0003723]; structural constituent of ribosome [GO:0003735]; antimicrobial humor…	RNA binding [GO:0003723]; structural constituent of ribosome [GO:0003735]	GO:0002181; GO:0003723; GO:0003735; GO:0005634; GO:0005737; GO:0005829; GO:0005925; GO:0006412; GO:0014069; GO:0016020; GO:0022625; GO:0022626; GO:0031640; GO:0042788; GO:0050829; GO:0061844; GO:0070062
sp|P83731|RL24_HUMAN	RL24_HUMAN	55000000	53676000	8347200	68913000	149220000	113300000	125370000	169650000	20224000	117060000	113180000	107740000	12	9.18067e+07	5.01952e+07	P83731	60S ribosomal protein L24 (60S ribosomal protein L30) (Large ribosomal subunit protein eL24)	cytoplasmic translation [GO:0002181]; translation [GO:0006412]	cytoplasm [GO:0005737]; cytosol [GO:0005829]; cytosolic large ribosomal subunit [GO:0022625]; cytosolic ribosome [GO:0022626]; endoplasmic reticulum [GO:0005783]; extracellular exosome [GO:0070062]; membrane [GO:0016020]; polysomal ribosome [GO:0042788]	cytoplasm [GO:0005737]; cytosol [GO:0005829]; cytosolic large ribosomal subunit [GO:0022625]; cytosolic ribosome [GO:0022626]; endoplasmic reticulum [GO:0005783]; extracellular exosome [GO:0070062]; membrane [GO:0016020]; polysomal ribosome [GO:0042788]; cadherin binding [GO:0045296]; mRNA binding [GO:0003729]; RNA binding [GO:0003723]; structural constituent of ribosome [GO:0003735]; cytoplasmic…	cadherin binding [GO:0045296]; mRNA binding [GO:0003729]; RNA binding [GO:0003723]; structural constituent of ribosome [GO:0003735]	GO:0002181; GO:0003723; GO:0003729; GO:0003735; GO:0005737; GO:0005783; GO:0005829; GO:0006412; GO:0016020; GO:0022625; GO:0022626; GO:0042788; GO:0045296; GO:0070062
sp|P31949|S10AB_HUMAN	S10AB_HUMAN	151240000	136020000	1693900	32477000	64850000	98064000	102950000	127320000	9326600	79081000	185570000	110950000	12	9.16285e+07	5.673e+07	P31949	Protein S100-A11 (Calgizzarin) (Metastatic lymph node gene 70 protein) (MLN 70) (Protein S100-C) (S100 calcium-binding protein A11) [Cleaved into: Protein S100-A11, N-terminally processed]	negative regulation of cell population proliferation [GO:0008285]; negative regulation of DNA replication [GO:0008156]; positive regulation of smooth muscle cell migration [GO:0014911]; signal transduction [GO:0007165]	adherens junction [GO:0005912]; cytoplasm [GO:0005737]; extracellular exosome [GO:0070062]; extracellular region [GO:0005576]; extracellular space [GO:0005615]; nucleus [GO:0005634]; ruffle [GO:0001726]; secretory granule lumen [GO:0034774]	adherens junction [GO:0005912]; cytoplasm [GO:0005737]; extracellular exosome [GO:0070062]; extracellular region [GO:0005576]; extracellular space [GO:0005615]; nucleus [GO:0005634]; ruffle [GO:0001726]; secretory granule lumen [GO:0034774]; cadherin binding involved in cell-cell adhesion [GO:0098641]; calcium ion binding [GO:0005509]; calcium-dependent protein binding [GO:0048306]; protein homod…	cadherin binding involved in cell-cell adhesion [GO:0098641]; calcium ion binding [GO:0005509]; calcium-dependent protein binding [GO:0048306]; protein homodimerization activity [GO:0042803]; S100 protein binding [GO:0044548]	GO:0001726; GO:0005509; GO:0005576; GO:0005615; GO:0005634; GO:0005737; GO:0005912; GO:0007165; GO:0008156; GO:0008285; GO:0014911; GO:0034774; GO:0042803; GO:0044548; GO:0048306; GO:0070062; GO:0098641
sp|Q3ZCM7|TBB8_HUMAN	TBB8_HUMAN	101010000	135790000	0	78344000	68419000	73425000	125330000	122070000	0	127230000	167960000	87199000	10	90564750	5.13799e+07	Q3ZCM7	Tubulin beta-8 chain (Tubulin beta 8 class VIII)	microtubule cytoskeleton organization [GO:0000226]; mitotic cell cycle [GO:0000278]; oocyte maturation [GO:0001556]; spindle assembly involved in female meiosis [GO:0007056]	cytoplasm [GO:0005737]; extracellular exosome [GO:0070062]; intercellular bridge [GO:0045171]; meiotic spindle [GO:0072687]; microtubule [GO:0005874]; microtubule cytoskeleton [GO:0015630]; mitotic spindle [GO:0072686]	cytoplasm [GO:0005737]; extracellular exosome [GO:0070062]; intercellular bridge [GO:0045171]; meiotic spindle [GO:0072687]; microtubule [GO:0005874]; microtubule cytoskeleton [GO:0015630]; mitotic spindle [GO:0072686]; GTP binding [GO:0005525]; GTPase activity [GO:0003924]; metal ion binding [GO:0046872]; structural constituent of cytoskeleton [GO:0005200]; microtubule cytoskeleton organization …	GTP binding [GO:0005525]; GTPase activity [GO:0003924]; metal ion binding [GO:0046872]; structural constituent of cytoskeleton [GO:0005200]	GO:0000226; GO:0000278; GO:0001556; GO:0003924; GO:0005200; GO:0005525; GO:0005737; GO:0005874; GO:0007056; GO:0015630; GO:0045171; GO:0046872; GO:0070062; GO:0072686; GO:0072687
sp|P37802|TAGL2_HUMAN	TAGL2_HUMAN	109170000	84625000	3066400	102660000	47855000	103620000	106460000	239350000	3701600	149260000	86363000	47471000	12	9.03002e+07	6.42666e+07	P37802	Transgelin-2 (Epididymis tissue protein Li 7e) (SM22-alpha homolog)	actin filament organization [GO:0007015]; epithelial cell differentiation [GO:0030855]	actin cytoskeleton [GO:0015629]; cytosol [GO:0005829]; extracellular exosome [GO:0070062]; extracellular region [GO:0005576]; vesicle [GO:0031982]	actin cytoskeleton [GO:0015629]; cytosol [GO:0005829]; extracellular exosome [GO:0070062]; extracellular region [GO:0005576]; vesicle [GO:0031982]; actin filament binding [GO:0051015]; cadherin binding [GO:0045296]; actin filament organization [GO:0007015]; epithelial cell differentiation [GO:0030855]	actin filament binding [GO:0051015]; cadherin binding [GO:0045296]	GO:0005576; GO:0005829; GO:0007015; GO:0015629; GO:0030855; GO:0031982; GO:0045296; GO:0051015; GO:0070062
sp|P62913|RL11_HUMAN	RL11_HUMAN	59213000	46724000	1671600	51268000	112820000	116090000	211390000	221190000	6154000	82972000	115590000	53759000	12	8.99035e+07	7.0271e+07	P62913	60S ribosomal protein L11 (CLL-associated antigen KW-12) (Large ribosomal subunit protein uL5)	cytoplasmic translation [GO:0002181]; negative regulation of proteasomal ubiquitin-dependent protein catabolic process [GO:0032435]; negative regulation of protein neddylation [GO:2000435]; negative regulation of ubiquitin protein ligase activity [GO:1904667]; negative regulation of ubiquitin-dependent protein catabolic process [GO:2000059]; positive regulation of gene expression [GO:0010628]; po…	cytoplasm [GO:0005737]; cytosol [GO:0005829]; cytosolic large ribosomal subunit [GO:0022625]; cytosolic ribosome [GO:0022626]; extracellular exosome [GO:0070062]; membrane [GO:0016020]; nucleolus [GO:0005730]; nucleoplasm [GO:0005654]; polysomal ribosome [GO:0042788]; protein-containing complex [GO:0032991]	cytoplasm [GO:0005737]; cytosol [GO:0005829]; cytosolic large ribosomal subunit [GO:0022625]; cytosolic ribosome [GO:0022626]; extracellular exosome [GO:0070062]; membrane [GO:0016020]; nucleolus [GO:0005730]; nucleoplasm [GO:0005654]; polysomal ribosome [GO:0042788]; protein-containing complex [GO:0032991]; 5S rRNA binding [GO:0008097]; RNA binding [GO:0003723]; structural constituent of ribosom…	5S rRNA binding [GO:0008097]; RNA binding [GO:0003723]; structural constituent of ribosome [GO:0003735]; ubiquitin ligase inhibitor activity [GO:1990948]; ubiquitin protein ligase binding [GO:0031625]	GO:0000027; GO:0002181; GO:0003723; GO:0003735; GO:0005654; GO:0005730; GO:0005737; GO:0005829; GO:0006364; GO:0006412; GO:0006605; GO:0008097; GO:0010628; GO:0016020; GO:0022625; GO:0022626; GO:0031625; GO:0032092; GO:0032435; GO:0032991; GO:0034504; GO:0042273; GO:0042788; GO:0050821; GO:0070062; GO:1901796; GO:1902255; GO:1904667; GO:1990948; GO:2000059; GO:2000435
sp|P60903|S10AA_HUMAN	S10AA_HUMAN	29588000	28766000	6092400	101660000	79598000	135950000	249380000	133470000	6852500	186790000	66529000	33785000	12	88205075	7.63015e+07	P60903	Protein S100-A10 (Calpactin I light chain) (Calpactin-1 light chain) (Cellular ligand of annexin II) (S100 calcium-binding protein A10) (p10 protein) (p11)	membrane raft assembly [GO:0001765]; mRNA transcription by RNA polymerase II [GO:0042789]; positive regulation of binding [GO:0051099]; positive regulation of exocytosis [GO:0045921]; positive regulation of focal adhesion assembly [GO:0051894]; positive regulation of GTPase activity [GO:0043547]; positive regulation of plasma membrane repair [GO:1905686]; positive regulation of plasminogen activa…	AnxA2-p11 complex [GO:1990665]; cell surface [GO:0009986]; collagen-containing extracellular matrix [GO:0062023]; cytoplasm [GO:0005737]; extracellular exosome [GO:0070062]; extracellular region [GO:0005576]; extracellular space [GO:0005615]; nuclear matrix [GO:0016363]; plasma membrane protein complex [GO:0098797]; RNA polymerase II transcription regulator complex [GO:0090575]	AnxA2-p11 complex [GO:1990665]; cell surface [GO:0009986]; collagen-containing extracellular matrix [GO:0062023]; cytoplasm [GO:0005737]; extracellular exosome [GO:0070062]; extracellular region [GO:0005576]; extracellular space [GO:0005615]; nuclear matrix [GO:0016363]; plasma membrane protein complex [GO:0098797]; RNA polymerase II transcription regulator complex [GO:0090575]; protein homodimer…	protein homodimerization activity [GO:0042803]; transmembrane transporter binding [GO:0044325]	GO:0001765; GO:0005576; GO:0005615; GO:0005737; GO:0006900; GO:0009986; GO:0010756; GO:0016363; GO:0042789; GO:0042803; GO:0043547; GO:0044325; GO:0045921; GO:0045944; GO:0050767; GO:0051099; GO:0051496; GO:0051894; GO:0062023; GO:0070062; GO:0072659; GO:0090575; GO:0098797; GO:1900026; GO:1905686; GO:1990665
sp|P08238|HS90B_HUMAN	HS90B_HUMAN	62405000	39032000	3451600	76038000	59895000	113870000	115410000	236960000	5405400	160670000	99628000	59358000	12	86010250	6.58889e+07	P08238	Heat shock protein HSP 90-beta (HSP 90) (Heat shock 84 kDa) (HSP 84) (HSP84)	axon extension [GO:0048675]; cellular response to heat [GO:0034605]; cellular response to interleukin-4 [GO:0071353]; central nervous system neuron axonogenesis [GO:0021955]; chaperone-mediated protein complex assembly [GO:0051131]; establishment of cell polarity [GO:0030010]; negative regulation of apoptotic process [GO:0043066]; negative regulation of proteasomal protein catabolic process [GO:1…	aryl hydrocarbon receptor complex [GO:0034751]; axonal growth cone [GO:0044295]; cell surface [GO:0009986]; cytoplasm [GO:0005737]; cytosol [GO:0005829]; dendritic growth cone [GO:0044294]; dynein axonemal particle [GO:0120293]; extracellular exosome [GO:0070062]; extracellular region [GO:0005576]; ficolin-1-rich granule lumen [GO:1904813]; HSP90-CDC37 chaperone complex [GO:1990565]; melanosome […	aryl hydrocarbon receptor complex [GO:0034751]; axonal growth cone [GO:0044295]; cell surface [GO:0009986]; cytoplasm [GO:0005737]; cytosol [GO:0005829]; dendritic growth cone [GO:0044294]; dynein axonemal particle [GO:0120293]; extracellular exosome [GO:0070062]; extracellular region [GO:0005576]; ficolin-1-rich granule lumen [GO:1904813]; HSP90-CDC37 chaperone complex [GO:1990565]; melanosome […	ATP binding [GO:0005524]; ATP hydrolysis activity [GO:0016887]; ATP-dependent protein binding [GO:0043008]; ATP-dependent protein folding chaperone [GO:0140662]; cadherin binding [GO:0045296]; disordered domain specific binding [GO:0097718]; DNA polymerase binding [GO:0070182]; double-stranded RNA binding [GO:0003725]; heat shock protein binding [GO:0031072]; histone deacetylase binding [GO:00428…	GO:0001890; GO:0003723; GO:0003725; GO:0005524; GO:0005576; GO:0005634; GO:0005654; GO:0005737; GO:0005739; GO:0005829; GO:0005886; GO:0006457; GO:0006986; GO:0007004; GO:0009986; GO:0016020; GO:0016887; GO:0019062; GO:0019887; GO:0019900; GO:0019901; GO:0021955; GO:0023026; GO:0030010; GO:0030235; GO:0030511; GO:0030911; GO:0031072; GO:0031396; GO:0031625; GO:0032435; GO:0032516; GO:0032880; GO:…
sp|Q06830|PRDX1_HUMAN	PRDX1_HUMAN	56916000	38229000	10708000	71199000	69828000	143860000	127630000	153950000	14748000	205240000	73053000	66640000	12	8.60001e+07	5.94007e+07	Q06830	Peroxiredoxin-1 (EC 1.11.1.24) (Natural killer cell-enhancing factor A) (NKEF-A) (Proliferation-associated gene protein) (PAG) (Thioredoxin peroxidase 2) (Thioredoxin-dependent peroxide reductase 2) (Thioredoxin-dependent peroxiredoxin 1)	cell population proliferation [GO:0008283]; cell redox homeostasis [GO:0045454]; erythrocyte homeostasis [GO:0034101]; fibroblast proliferation [GO:0048144]; hydrogen peroxide catabolic process [GO:0042744]; leukocyte activation [GO:0045321]; natural killer cell activation [GO:0030101]; natural killer cell mediated cytotoxicity [GO:0042267]; regulation of NIK/NF-kappaB signaling [GO:1901222]; reg…	cytoplasm [GO:0005737]; cytosol [GO:0005829]; extracellular exosome [GO:0070062]; extracellular space [GO:0005615]; melanosome [GO:0042470]; nucleus [GO:0005634]	cytoplasm [GO:0005737]; cytosol [GO:0005829]; extracellular exosome [GO:0070062]; extracellular space [GO:0005615]; melanosome [GO:0042470]; nucleus [GO:0005634]; cadherin binding [GO:0045296]; identical protein binding [GO:0042802]; peroxidase activity [GO:0004601]; RNA binding [GO:0003723]; thioredoxin peroxidase activity [GO:0008379]; cell population proliferation [GO:0008283]; cell redox home…	cadherin binding [GO:0045296]; identical protein binding [GO:0042802]; peroxidase activity [GO:0004601]; RNA binding [GO:0003723]; thioredoxin peroxidase activity [GO:0008379]	GO:0001501; GO:0001895; GO:0003723; GO:0004601; GO:0005615; GO:0005634; GO:0005737; GO:0005829; GO:0006979; GO:0008283; GO:0008379; GO:0019430; GO:0030101; GO:0032872; GO:0034101; GO:0042267; GO:0042470; GO:0042744; GO:0042802; GO:0045296; GO:0045321; GO:0045454; GO:0048144; GO:0070062; GO:1901222
sp|Q9Y3U8|RL36_HUMAN	RL36_HUMAN	28681000	29281000	5364700	50271000	99596000	145940000	194510000	183980000	15097000	87804000	140550000	50901000	12	85997975	6.65182e+07	Q9Y3U8	60S ribosomal protein L36 (Large ribosomal subunit protein eL36)	cytoplasmic translation [GO:0002181]; translation [GO:0006412]	cytoplasm [GO:0005737]; cytosol [GO:0005829]; cytosolic large ribosomal subunit [GO:0022625]; cytosolic ribosome [GO:0022626]; membrane [GO:0016020]; nucleolus [GO:0005730]; polysomal ribosome [GO:0042788]	cytoplasm [GO:0005737]; cytosol [GO:0005829]; cytosolic large ribosomal subunit [GO:0022625]; cytosolic ribosome [GO:0022626]; membrane [GO:0016020]; nucleolus [GO:0005730]; polysomal ribosome [GO:0042788]; RNA binding [GO:0003723]; structural constituent of ribosome [GO:0003735]; cytoplasmic translation [GO:0002181]; translation [GO:0006412]	RNA binding [GO:0003723]; structural constituent of ribosome [GO:0003735]	GO:0002181; GO:0003723; GO:0003735; GO:0005730; GO:0005737; GO:0005829; GO:0006412; GO:0016020; GO:0022625; GO:0022626; GO:0042788
sp|P24534|EF1B_HUMAN	EF1B_HUMAN	130530000	90422000	26333000	82416000	31570000	80853000	110990000	115260000	34166000	101580000	103220000	114210000	12	8.51292e+07	3.57491e+07	P24534	Elongation factor 1-beta (EF-1-beta)	translational elongation [GO:0006414]	cytoplasm [GO:0005737]; cytosol [GO:0005829]; eukaryotic translation elongation factor 1 complex [GO:0005853]	cytoplasm [GO:0005737]; cytosol [GO:0005829]; eukaryotic translation elongation factor 1 complex [GO:0005853]; guanyl-nucleotide exchange factor activity [GO:0005085]; translation elongation factor activity [GO:0003746]; translational elongation [GO:0006414]	guanyl-nucleotide exchange factor activity [GO:0005085]; translation elongation factor activity [GO:0003746]	GO:0003746; GO:0005085; GO:0005737; GO:0005829; GO:0005853; GO:0006414
sp|P62750|RL23A_HUMAN	RL23A_HUMAN	72669000	82845000	22907000	82616000	102460000	83365000	106580000	161250000	37476000	73219000	113430000	68603000	12	8.39517e+07	3.57599e+07	P62750	60S ribosomal protein L23a (Large ribosomal subunit protein uL23)	cytoplasmic translation [GO:0002181]; ribosomal large subunit assembly [GO:0000027]; translation [GO:0006412]	cytoplasm [GO:0005737]; cytosol [GO:0005829]; cytosolic large ribosomal subunit [GO:0022625]; cytosolic ribosome [GO:0022626]; extracellular exosome [GO:0070062]; nucleolus [GO:0005730]; nucleus [GO:0005634]; synapse [GO:0045202]	cytoplasm [GO:0005737]; cytosol [GO:0005829]; cytosolic large ribosomal subunit [GO:0022625]; cytosolic ribosome [GO:0022626]; extracellular exosome [GO:0070062]; nucleolus [GO:0005730]; nucleus [GO:0005634]; synapse [GO:0045202]; cadherin binding [GO:0045296]; RNA binding [GO:0003723]; rRNA binding [GO:0019843]; structural constituent of ribosome [GO:0003735]; TORC2 complex binding [GO:1904841];…	cadherin binding [GO:0045296]; RNA binding [GO:0003723]; rRNA binding [GO:0019843]; structural constituent of ribosome [GO:0003735]; TORC2 complex binding [GO:1904841]	GO:0000027; GO:0002181; GO:0003723; GO:0003735; GO:0005634; GO:0005730; GO:0005737; GO:0005829; GO:0006412; GO:0019843; GO:0022625; GO:0022626; GO:0045202; GO:0045296; GO:0070062; GO:1904841
sp|P62241|RS8_HUMAN	RS8_HUMAN	76168000	65952000	12399000	61825000	113900000	59187000	107530000	159460000	41271000	57672000	145570000	90772000	12	8.26422e+07	4.2743e+07	P62241	40S ribosomal protein S8 (Small ribosomal subunit protein eS8)	cytoplasmic translation [GO:0002181]; maturation of SSU-rRNA from tricistronic rRNA transcript (SSU-rRNA, 5.8S rRNA, LSU-rRNA) [GO:0000462]; ribosomal small subunit biogenesis [GO:0042274]; translation [GO:0006412]	cytoplasm [GO:0005737]; cytosol [GO:0005829]; cytosolic ribosome [GO:0022626]; cytosolic small ribosomal subunit [GO:0022627]; endoplasmic reticulum [GO:0005783]; extracellular exosome [GO:0070062]; focal adhesion [GO:0005925]; membrane [GO:0016020]; nucleolus [GO:0005730]; nucleoplasm [GO:0005654]; nucleus [GO:0005634]; ribonucleoprotein complex [GO:1990904]; small-subunit processome [GO:0032040]	cytoplasm [GO:0005737]; cytosol [GO:0005829]; cytosolic ribosome [GO:0022626]; cytosolic small ribosomal subunit [GO:0022627]; endoplasmic reticulum [GO:0005783]; extracellular exosome [GO:0070062]; focal adhesion [GO:0005925]; membrane [GO:0016020]; nucleolus [GO:0005730]; nucleoplasm [GO:0005654]; nucleus [GO:0005634]; ribonucleoprotein complex [GO:1990904]; small-subunit processome [GO:0032040…	RNA binding [GO:0003723]; structural constituent of ribosome [GO:0003735]	GO:0000462; GO:0002181; GO:0003723; GO:0003735; GO:0005634; GO:0005654; GO:0005730; GO:0005737; GO:0005783; GO:0005829; GO:0005925; GO:0006412; GO:0016020; GO:0022626; GO:0022627; GO:0032040; GO:0042274; GO:0070062; GO:1990904
sp|P62854|RS26_HUMAN	RS26_HUMAN	94120000	74413000	15905000	42102000	110990000	70650000	87359000	157930000	32341000	52225000	175230000	78222000	12	8.26239e+07	4.76561e+07	P62854	40S ribosomal protein S26 (Small ribosomal subunit protein eS26)	cytoplasmic translation [GO:0002181]; negative regulation of RNA splicing [GO:0033119]; translation [GO:0006412]	cytoplasm [GO:0005737]; cytoplasmic side of rough endoplasmic reticulum membrane [GO:0098556]; cytosol [GO:0005829]; cytosolic small ribosomal subunit [GO:0022627]; extracellular exosome [GO:0070062]; membrane [GO:0016020]; nucleoplasm [GO:0005654]; polysomal ribosome [GO:0042788]; small ribosomal subunit [GO:0015935]; synapse [GO:0045202]	cytoplasm [GO:0005737]; cytoplasmic side of rough endoplasmic reticulum membrane [GO:0098556]; cytosol [GO:0005829]; cytosolic small ribosomal subunit [GO:0022627]; extracellular exosome [GO:0070062]; membrane [GO:0016020]; nucleoplasm [GO:0005654]; polysomal ribosome [GO:0042788]; small ribosomal subunit [GO:0015935]; synapse [GO:0045202]; cadherin binding [GO:0045296]; mRNA binding [GO:0003729]…	cadherin binding [GO:0045296]; mRNA binding [GO:0003729]; RNA binding [GO:0003723]; structural constituent of ribosome [GO:0003735]	GO:0002181; GO:0003723; GO:0003729; GO:0003735; GO:0005654; GO:0005737; GO:0005829; GO:0006412; GO:0015935; GO:0016020; GO:0022627; GO:0033119; GO:0042788; GO:0045202; GO:0045296; GO:0070062; GO:0098556
sp|P62424|RL7A_HUMAN	RL7A_HUMAN	34274000	28967000	22612000	33380000	139130000	91594000	146890000	249680000	53613000	74089000	62950000	42781000	12	8.16633e+07	6.70362e+07	P62424	60S ribosomal protein L7a (Large ribosomal subunit protein eL8) (PLA-X polypeptide) (Surfeit locus protein 3)	cytoplasmic translation [GO:0002181]; ribosome biogenesis [GO:0042254]; translation [GO:0006412]	cytoplasm [GO:0005737]; cytosol [GO:0005829]; cytosolic large ribosomal subunit [GO:0022625]; cytosolic ribosome [GO:0022626]; focal adhesion [GO:0005925]; membrane [GO:0016020]; nucleolus [GO:0005730]; nucleus [GO:0005634]; polysomal ribosome [GO:0042788]; synapse [GO:0045202]	cytoplasm [GO:0005737]; cytosol [GO:0005829]; cytosolic large ribosomal subunit [GO:0022625]; cytosolic ribosome [GO:0022626]; focal adhesion [GO:0005925]; membrane [GO:0016020]; nucleolus [GO:0005730]; nucleus [GO:0005634]; polysomal ribosome [GO:0042788]; synapse [GO:0045202]; cadherin binding [GO:0045296]; RNA binding [GO:0003723]; structural constituent of ribosome [GO:0003735]; cytoplasmic t…	cadherin binding [GO:0045296]; RNA binding [GO:0003723]; structural constituent of ribosome [GO:0003735]	GO:0002181; GO:0003723; GO:0003735; GO:0005634; GO:0005730; GO:0005737; GO:0005829; GO:0005925; GO:0006412; GO:0016020; GO:0022625; GO:0022626; GO:0042254; GO:0042788; GO:0045202; GO:0045296
sp|P0DPH8|TBA3D_HUMAN	TBA3D_HUMAN	99647000	92389000	197110	50807000	60333000	67697000	115800000	71716000	384010	126230000	195760000	92157000	12	8.10931e+07	5.36473e+07	P0DPH8	Tubulin alpha-3D chain (Alpha-tubulin 3D) [Cleaved into: Detyrosinated tubulin alpha-3D chain]	microtubule cytoskeleton organization [GO:0000226]; mitotic cell cycle [GO:0000278]	cytoplasm [GO:0005737]; microtubule [GO:0005874]; microtubule cytoskeleton [GO:0015630]	cytoplasm [GO:0005737]; microtubule [GO:0005874]; microtubule cytoskeleton [GO:0015630]; GTP binding [GO:0005525]; hydrolase activity [GO:0016787]; metal ion binding [GO:0046872]; structural constituent of cytoskeleton [GO:0005200]; microtubule cytoskeleton organization [GO:0000226]; mitotic cell cycle [GO:0000278]	GTP binding [GO:0005525]; hydrolase activity [GO:0016787]; metal ion binding [GO:0046872]; structural constituent of cytoskeleton [GO:0005200]	GO:0000226; GO:0000278; GO:0005200; GO:0005525; GO:0005737; GO:0005874; GO:0015630; GO:0016787; GO:0046872
sp|P46777|RL5_HUMAN	RL5_HUMAN	54789000	44475000	2304700	45160000	111860000	97984000	132440000	200140000	20802000	56922000	119930000	82436000	12	80770225	5.50209e+07	P46777	60S ribosomal protein L5 (Large ribosomal subunit protein uL18)	cytoplasmic translation [GO:0002181]; negative regulation of protein neddylation [GO:2000435]; negative regulation of ubiquitin protein ligase activity [GO:1904667]; negative regulation of ubiquitin-dependent protein catabolic process [GO:2000059]; positive regulation of gene expression [GO:0010628]; positive regulation of translation [GO:0045727]; protein stabilization [GO:0050821]; regulation o…	cytoplasm [GO:0005737]; cytosol [GO:0005829]; cytosolic large ribosomal subunit [GO:0022625]; cytosolic ribosome [GO:0022626]; endoplasmic reticulum [GO:0005783]; extracellular exosome [GO:0070062]; focal adhesion [GO:0005925]; membrane [GO:0016020]; nucleolus [GO:0005730]; nucleoplasm [GO:0005654]; nucleus [GO:0005634]; protein-containing complex [GO:0032991]; ribonucleoprotein complex [GO:19909…	cytoplasm [GO:0005737]; cytosol [GO:0005829]; cytosolic large ribosomal subunit [GO:0022625]; cytosolic ribosome [GO:0022626]; endoplasmic reticulum [GO:0005783]; extracellular exosome [GO:0070062]; focal adhesion [GO:0005925]; membrane [GO:0016020]; nucleolus [GO:0005730]; nucleoplasm [GO:0005654]; nucleus [GO:0005634]; protein-containing complex [GO:0032991]; ribonucleoprotein complex [GO:19909…	5S rRNA binding [GO:0008097]; mRNA 3'-UTR binding [GO:0003730]; mRNA 5'-UTR binding [GO:0048027]; RNA binding [GO:0003723]; structural constituent of ribosome [GO:0003735]; ubiquitin ligase inhibitor activity [GO:1990948]; ubiquitin protein ligase binding [GO:0031625]	GO:0000027; GO:0002181; GO:0003723; GO:0003730; GO:0003735; GO:0005634; GO:0005654; GO:0005730; GO:0005737; GO:0005783; GO:0005829; GO:0005925; GO:0006364; GO:0006412; GO:0008097; GO:0010628; GO:0016020; GO:0022625; GO:0022626; GO:0031625; GO:0032991; GO:0042273; GO:0045727; GO:0048027; GO:0050821; GO:0070062; GO:1901796; GO:1904667; GO:1990904; GO:1990948; GO:2000059; GO:2000435
sp|P62280|RS11_HUMAN	RS11_HUMAN	39605000	40499000	7540700	49046000	113540000	144260000	109300000	207790000	17123000	111090000	84264000	39375000	12	8.02861e+07	5.9108e+07	P62280	40S ribosomal protein S11 (Small ribosomal subunit protein uS17)	cytoplasmic translation [GO:0002181]; ribosomal small subunit biogenesis [GO:0042274]; translation [GO:0006412]	cytoplasm [GO:0005737]; cytosol [GO:0005829]; cytosolic ribosome [GO:0022626]; cytosolic small ribosomal subunit [GO:0022627]; extracellular exosome [GO:0070062]; focal adhesion [GO:0005925]; membrane [GO:0016020]; nucleolus [GO:0005730]; nucleoplasm [GO:0005654]; ribosome [GO:0005840]; small-subunit processome [GO:0032040]; synapse [GO:0045202]	cytoplasm [GO:0005737]; cytosol [GO:0005829]; cytosolic ribosome [GO:0022626]; cytosolic small ribosomal subunit [GO:0022627]; extracellular exosome [GO:0070062]; focal adhesion [GO:0005925]; membrane [GO:0016020]; nucleolus [GO:0005730]; nucleoplasm [GO:0005654]; ribosome [GO:0005840]; small-subunit processome [GO:0032040]; synapse [GO:0045202]; RNA binding [GO:0003723]; rRNA binding [GO:0019843…	RNA binding [GO:0003723]; rRNA binding [GO:0019843]; structural constituent of ribosome [GO:0003735]	GO:0002181; GO:0003723; GO:0003735; GO:0005654; GO:0005730; GO:0005737; GO:0005829; GO:0005840; GO:0005925; GO:0006412; GO:0016020; GO:0019843; GO:0022626; GO:0022627; GO:0032040; GO:0042274; GO:0045202; GO:0070062
sp|P60174|TPIS_HUMAN	TPIS_HUMAN	72474000	113550000	21707000	54540000	34372000	70649000	83763000	190270000	75117000	55605000	107980000	79812000	12	7.99866e+07	4.36655e+07	P60174	Triosephosphate isomerase (TIM) (EC 5.3.1.1) (Methylglyoxal synthase) (EC 4.2.3.3) (Triose-phosphate isomerase)	canonical glycolysis [GO:0061621]; gluconeogenesis [GO:0006094]; glyceraldehyde-3-phosphate biosynthetic process [GO:0046166]; glycerol catabolic process [GO:0019563]; glycolytic process [GO:0006096]; methylglyoxal biosynthetic process [GO:0019242]	cytosol [GO:0005829]; extracellular exosome [GO:0070062]; extracellular space [GO:0005615]; nucleus [GO:0005634]	cytosol [GO:0005829]; extracellular exosome [GO:0070062]; extracellular space [GO:0005615]; nucleus [GO:0005634]; methylglyoxal synthase activity [GO:0008929]; protein homodimerization activity [GO:0042803]; triose-phosphate isomerase activity [GO:0004807]; ubiquitin protein ligase binding [GO:0031625]; canonical glycolysis [GO:0061621]; gluconeogenesis [GO:0006094]; glyceraldehyde-3-phosphate bi…	methylglyoxal synthase activity [GO:0008929]; protein homodimerization activity [GO:0042803]; triose-phosphate isomerase activity [GO:0004807]; ubiquitin protein ligase binding [GO:0031625]	GO:0004807; GO:0005615; GO:0005634; GO:0005829; GO:0006094; GO:0006096; GO:0008929; GO:0019242; GO:0019563; GO:0031625; GO:0042803; GO:0046166; GO:0061621; GO:0070062
sp|P62851|RS25_HUMAN	RS25_HUMAN	35795000	38508000	10935000	63684000	160720000	107660000	90979000	146050000	24641000	90673000	71365000	74973000	12	7.63319e+07	4.63119e+07	P62851	40S ribosomal protein S25 (Small ribosomal subunit protein eS25)	cytoplasmic translation [GO:0002181]; ribosomal small subunit biogenesis [GO:0042274]; rRNA processing [GO:0006364]; translation [GO:0006412]	cytoplasm [GO:0005737]; cytosol [GO:0005829]; cytosolic ribosome [GO:0022626]; cytosolic small ribosomal subunit [GO:0022627]; extracellular exosome [GO:0070062]; nucleolus [GO:0005730]; nucleoplasm [GO:0005654]; nucleus [GO:0005634]; postsynaptic density [GO:0014069]; ribosome [GO:0005840]; small ribosomal subunit [GO:0015935]	cytoplasm [GO:0005737]; cytosol [GO:0005829]; cytosolic ribosome [GO:0022626]; cytosolic small ribosomal subunit [GO:0022627]; extracellular exosome [GO:0070062]; nucleolus [GO:0005730]; nucleoplasm [GO:0005654]; nucleus [GO:0005634]; postsynaptic density [GO:0014069]; ribosome [GO:0005840]; small ribosomal subunit [GO:0015935]; RNA binding [GO:0003723]; structural constituent of ribosome [GO:000…	RNA binding [GO:0003723]; structural constituent of ribosome [GO:0003735]	GO:0002181; GO:0003723; GO:0003735; GO:0005634; GO:0005654; GO:0005730; GO:0005737; GO:0005829; GO:0005840; GO:0006364; GO:0006412; GO:0014069; GO:0015935; GO:0022626; GO:0022627; GO:0042274; GO:0070062
sp|P35908|K22E_HUMAN	K22E_HUMAN	53036000	39066000	17718000	123710000	219180000	63605000	80802000	128150000	58760000	55618000	38170000	34651000	12	7.60388e+07	5.62582e+07	P35908	Keratin, type II cytoskeletal 2 epidermal (Cytokeratin-2e) (CK-2e) (Epithelial keratin-2e) (Keratin-2 epidermis) (Keratin-2e) (K2e) (Type-II keratin Kb2)	epidermis development [GO:0008544]; intermediate filament organization [GO:0045109]; keratinization [GO:0031424]; keratinocyte activation [GO:0032980]; keratinocyte development [GO:0003334]; keratinocyte migration [GO:0051546]; keratinocyte proliferation [GO:0043616]; peptide cross-linking [GO:0018149]; positive regulation of epidermis development [GO:0045684]	cornified envelope [GO:0001533]; cytoplasm [GO:0005737]; cytosol [GO:0005829]; extracellular exosome [GO:0070062]; extracellular space [GO:0005615]; intermediate filament [GO:0005882]; keratin filament [GO:0045095]; membrane [GO:0016020]; nucleus [GO:0005634]	cornified envelope [GO:0001533]; cytoplasm [GO:0005737]; cytosol [GO:0005829]; extracellular exosome [GO:0070062]; extracellular space [GO:0005615]; intermediate filament [GO:0005882]; keratin filament [GO:0045095]; membrane [GO:0016020]; nucleus [GO:0005634]; cytoskeletal protein binding [GO:0008092]; structural constituent of cytoskeleton [GO:0005200]; structural constituent of skin epidermis […	cytoskeletal protein binding [GO:0008092]; structural constituent of cytoskeleton [GO:0005200]; structural constituent of skin epidermis [GO:0030280]	GO:0001533; GO:0003334; GO:0005200; GO:0005615; GO:0005634; GO:0005737; GO:0005829; GO:0005882; GO:0008092; GO:0008544; GO:0016020; GO:0018149; GO:0030280; GO:0031424; GO:0032980; GO:0043616; GO:0045095; GO:0045109; GO:0045684; GO:0051546; GO:0070062
sp|P23396|RS3_HUMAN	RS3_HUMAN	42391000	30072000	7482300	58868000	129070000	164860000	123430000	125320000	15881000	103460000	65986000	29928000	12	74729025	5.23915e+07	P23396	40S ribosomal protein S3 (EC 4.2.99.18) (Small ribosomal subunit protein uS3)	apoptotic process [GO:0006915]; cell division [GO:0051301]; cellular response to hydrogen peroxide [GO:0070301]; cellular response to reactive oxygen species [GO:0034614]; cellular response to tumor necrosis factor [GO:0071356]; chromosome segregation [GO:0007059]; cytoplasmic translation [GO:0002181]; DNA damage response [GO:0006974]; DNA repair [GO:0006281]; negative regulation of DNA repair [G…	cytoplasm [GO:0005737]; cytosol [GO:0005829]; cytosolic ribosome [GO:0022626]; cytosolic small ribosomal subunit [GO:0022627]; endoplasmic reticulum [GO:0005783]; extracellular exosome [GO:0070062]; focal adhesion [GO:0005925]; membrane [GO:0016020]; mitochondrial inner membrane [GO:0005743]; mitochondrial matrix [GO:0005759]; mitotic spindle [GO:0072686]; NF-kappaB complex [GO:0071159]; nucleolu…	cytoplasm [GO:0005737]; cytosol [GO:0005829]; cytosolic ribosome [GO:0022626]; cytosolic small ribosomal subunit [GO:0022627]; endoplasmic reticulum [GO:0005783]; extracellular exosome [GO:0070062]; focal adhesion [GO:0005925]; membrane [GO:0016020]; mitochondrial inner membrane [GO:0005743]; mitochondrial matrix [GO:0005759]; mitotic spindle [GO:0072686]; NF-kappaB complex [GO:0071159]; nucleolu…	class I DNA-(apurinic or apyrimidinic site) endonuclease activity [GO:0140078]; damaged DNA binding [GO:0003684]; DNA binding [GO:0003677]; DNA endonuclease activity [GO:0004520]; DNA-(apurinic or apyrimidinic site) endonuclease activity [GO:0003906]; DNA-binding transcription factor binding [GO:0140297]; enzyme binding [GO:0019899]; Hsp70 protein binding [GO:0030544]; Hsp90 protein binding [GO:0…	GO:0002181; GO:0003677; GO:0003684; GO:0003723; GO:0003729; GO:0003735; GO:0003906; GO:0004520; GO:0005634; GO:0005654; GO:0005730; GO:0005737; GO:0005743; GO:0005759; GO:0005783; GO:0005829; GO:0005840; GO:0005844; GO:0005886; GO:0005925; GO:0006281; GO:0006412; GO:0006413; GO:0006915; GO:0006974; GO:0007059; GO:0008017; GO:0010628; GO:0014069; GO:0015631; GO:0016020; GO:0017148; GO:0019899; GO:…
sp|P61353|RL27_HUMAN	RL27_HUMAN	31524000	29345000	16065000	60318000	86447000	123500000	231010000	99803000	24617000	59546000	94273000	39550000	12	74666500	5.99281e+07	P61353	60S ribosomal protein L27 (Large ribosomal subunit protein eL27)	cytoplasmic translation [GO:0002181]; response to aldosterone [GO:1904044]; rRNA processing [GO:0006364]; translation [GO:0006412]	cytoplasm [GO:0005737]; cytoplasmic side of rough endoplasmic reticulum membrane [GO:0098556]; cytosol [GO:0005829]; cytosolic large ribosomal subunit [GO:0022625]; cytosolic ribosome [GO:0022626]; extracellular exosome [GO:0070062]; focal adhesion [GO:0005925]; membrane [GO:0016020]; nucleolus [GO:0005730]; nucleoplasm [GO:0005654]; nucleus [GO:0005634]; ribonucleoprotein complex [GO:1990904]; r…	cytoplasm [GO:0005737]; cytoplasmic side of rough endoplasmic reticulum membrane [GO:0098556]; cytosol [GO:0005829]; cytosolic large ribosomal subunit [GO:0022625]; cytosolic ribosome [GO:0022626]; extracellular exosome [GO:0070062]; focal adhesion [GO:0005925]; membrane [GO:0016020]; nucleolus [GO:0005730]; nucleoplasm [GO:0005654]; nucleus [GO:0005634]; ribonucleoprotein complex [GO:1990904]; r…	RNA binding [GO:0003723]; structural constituent of ribosome [GO:0003735]	GO:0002181; GO:0003723; GO:0003735; GO:0005634; GO:0005654; GO:0005730; GO:0005737; GO:0005829; GO:0005840; GO:0005925; GO:0006364; GO:0006412; GO:0016020; GO:0022625; GO:0022626; GO:0045202; GO:0070062; GO:0098556; GO:1904044; GO:1990904
sp|P61247|RS3A_HUMAN	RS3A_HUMAN	40615000	39250000	8216300	63340000	93847000	98007000	85935000	219420000	27822000	82964000	81942000	53608000	12	74580525	5.36915e+07	P61247	40S ribosomal protein S3a (Small ribosomal subunit protein eS1) (v-fos transformation effector protein) (Fte-1)	cell differentiation [GO:0030154]; cytoplasmic translation [GO:0002181]; negative regulation of apoptotic process [GO:0043066]; ribosomal small subunit biogenesis [GO:0042274]; translation [GO:0006412]; translational initiation [GO:0006413]	cytoplasm [GO:0005737]; cytosol [GO:0005829]; cytosolic ribosome [GO:0022626]; cytosolic small ribosomal subunit [GO:0022627]; endoplasmic reticulum [GO:0005783]; extracellular exosome [GO:0070062]; focal adhesion [GO:0005925]; nucleolus [GO:0005730]; nucleoplasm [GO:0005654]; nucleus [GO:0005634]; ribonucleoprotein complex [GO:1990904]; small-subunit processome [GO:0032040]; synapse [GO:0045202]	cytoplasm [GO:0005737]; cytosol [GO:0005829]; cytosolic ribosome [GO:0022626]; cytosolic small ribosomal subunit [GO:0022627]; endoplasmic reticulum [GO:0005783]; extracellular exosome [GO:0070062]; focal adhesion [GO:0005925]; nucleolus [GO:0005730]; nucleoplasm [GO:0005654]; nucleus [GO:0005634]; ribonucleoprotein complex [GO:1990904]; small-subunit processome [GO:0032040]; synapse [GO:0045202]…	mRNA 5'-UTR binding [GO:0048027]; RNA binding [GO:0003723]; structural constituent of ribosome [GO:0003735]	GO:0002181; GO:0003723; GO:0003735; GO:0005634; GO:0005654; GO:0005730; GO:0005737; GO:0005783; GO:0005829; GO:0005925; GO:0006412; GO:0006413; GO:0022626; GO:0022627; GO:0030154; GO:0032040; GO:0042274; GO:0043066; GO:0045202; GO:0048027; GO:0070062; GO:1990904
sp|P62917|RL8_HUMAN	RL8_HUMAN	31356000	42629000	11729000	43892000	83601000	71713000	138240000	213880000	33747000	68202000	78755000	40315000	12	7.15049e+07	5.5689e+07	P62917	60S ribosomal protein L8 (Large ribosomal subunit protein uL2)	cytoplasmic translation [GO:0002181]; translation [GO:0006412]	cytoplasm [GO:0005737]; cytosol [GO:0005829]; cytosolic large ribosomal subunit [GO:0022625]; cytosolic ribosome [GO:0022626]; focal adhesion [GO:0005925]; membrane [GO:0016020]; polysomal ribosome [GO:0042788]; postsynapse [GO:0098794]; postsynaptic density [GO:0014069]	cytoplasm [GO:0005737]; cytosol [GO:0005829]; cytosolic large ribosomal subunit [GO:0022625]; cytosolic ribosome [GO:0022626]; focal adhesion [GO:0005925]; membrane [GO:0016020]; polysomal ribosome [GO:0042788]; postsynapse [GO:0098794]; postsynaptic density [GO:0014069]; RNA binding [GO:0003723]; rRNA binding [GO:0019843]; structural constituent of ribosome [GO:0003735]; cytoplasmic translation …	RNA binding [GO:0003723]; rRNA binding [GO:0019843]; structural constituent of ribosome [GO:0003735]	GO:0002181; GO:0003723; GO:0003735; GO:0005737; GO:0005829; GO:0005925; GO:0006412; GO:0014069; GO:0016020; GO:0019843; GO:0022625; GO:0022626; GO:0042788; GO:0098794
sp|P16104|H2AX_HUMAN	H2AX_HUMAN	65789000	68840000	2879500	72640000	9325800	66793000	161250000	193340000	13947000	98594000	64847000	36483000	12	7.12274e+07	5.7882e+07	P16104	Histone H2AX (H2a/x) (Histone H2A.X)	cellular response to gamma radiation [GO:0071480]; cellular senescence [GO:0090398]; cerebral cortex development [GO:0021987]; DNA damage checkpoint signaling [GO:0000077]; DNA damage response [GO:0006974]; double-strand break repair [GO:0006302]; double-strand break repair via homologous recombination [GO:0000724]; meiotic cell cycle [GO:0051321]; nucleosome assembly [GO:0006334]; positive regul…	centrosome [GO:0005813]; condensed nuclear chromosome [GO:0000794]; extracellular exosome [GO:0070062]; male germ cell nucleus [GO:0001673]; nuclear speck [GO:0016607]; nucleoplasm [GO:0005654]; nucleosome [GO:0000786]; nucleus [GO:0005634]; replication fork [GO:0005657]; site of DNA damage [GO:0090734]; site of double-strand break [GO:0035861]; XY body [GO:0001741]	centrosome [GO:0005813]; condensed nuclear chromosome [GO:0000794]; extracellular exosome [GO:0070062]; male germ cell nucleus [GO:0001673]; nuclear speck [GO:0016607]; nucleoplasm [GO:0005654]; nucleosome [GO:0000786]; nucleus [GO:0005634]; replication fork [GO:0005657]; site of DNA damage [GO:0090734]; site of double-strand break [GO:0035861]; XY body [GO:0001741]; damaged DNA binding [GO:00036…	damaged DNA binding [GO:0003684]; DNA binding [GO:0003677]; enzyme binding [GO:0019899]; histone binding [GO:0042393]; protein heterodimerization activity [GO:0046982]; structural constituent of chromatin [GO:0030527]	GO:0000077; GO:0000724; GO:0000786; GO:0000794; GO:0001673; GO:0001741; GO:0003677; GO:0003684; GO:0005634; GO:0005654; GO:0005657; GO:0005813; GO:0006302; GO:0006334; GO:0006974; GO:0007283; GO:0010212; GO:0016607; GO:0019899; GO:0021987; GO:0030527; GO:0035861; GO:0042393; GO:0045739; GO:0046982; GO:0051321; GO:0070062; GO:0071480; GO:0090398; GO:0090734
sp|P22626|ROA2_HUMAN	ROA2_HUMAN	43963000	51164000	85025000	52659000	28020000	91636000	59040000	69192000	138080000	96514000	80209000	51110000	12	70551000	2.97041e+07	P22626	Heterogeneous nuclear ribonucleoproteins A2/B1 (hnRNP A2/B1)	G-quadruplex DNA unwinding [GO:0044806]; miRNA transport [GO:1990428]; mRNA export from nucleus [GO:0006406]; mRNA processing [GO:0006397]; mRNA splicing, via spliceosome [GO:0000398]; negative regulation of mRNA splicing, via spliceosome [GO:0048025]; negative regulation of transcription by RNA polymerase II [GO:0000122]; positive regulation of telomerase RNA reverse transcriptase activity [GO:1…	Cajal body [GO:0015030]; catalytic step 2 spliceosome [GO:0071013]; chromosome, telomeric region [GO:0000781]; cytoplasm [GO:0005737]; extracellular exosome [GO:0070062]; membrane [GO:0016020]; nuclear matrix [GO:0016363]; nucleoplasm [GO:0005654]; nucleus [GO:0005634]; ribonucleoprotein complex [GO:1990904]; spliceosomal complex [GO:0005681]	Cajal body [GO:0015030]; catalytic step 2 spliceosome [GO:0071013]; chromosome, telomeric region [GO:0000781]; cytoplasm [GO:0005737]; extracellular exosome [GO:0070062]; membrane [GO:0016020]; nuclear matrix [GO:0016363]; nucleoplasm [GO:0005654]; nucleus [GO:0005634]; ribonucleoprotein complex [GO:1990904]; spliceosomal complex [GO:0005681]; G-rich strand telomeric DNA binding [GO:0098505]; ide…	G-rich strand telomeric DNA binding [GO:0098505]; identical protein binding [GO:0042802]; miRNA binding [GO:0035198]; molecular condensate scaffold activity [GO:0140693]; mRNA 3'-UTR binding [GO:0003730]; N6-methyladenosine-containing RNA binding [GO:1990247]; pre-mRNA intronic binding [GO:0097157]; RNA binding [GO:0003723]; single-stranded telomeric DNA binding [GO:0043047]	GO:0000122; GO:0000398; GO:0000781; GO:0003723; GO:0003730; GO:0005634; GO:0005654; GO:0005681; GO:0005737; GO:0006397; GO:0006406; GO:0015030; GO:0016020; GO:0016363; GO:0031053; GO:0035198; GO:0042802; GO:0043047; GO:0044806; GO:0048025; GO:0050658; GO:0070062; GO:0071013; GO:0097157; GO:0098505; GO:0140693; GO:1904358; GO:1905663; GO:1990247; GO:1990428; GO:1990904
sp|P62857|RS28_HUMAN	RS28_HUMAN	68903000	53078000	65829000	57546000	69318000	63289000	39457000	42800000	159190000	59096000	117140000	50817000	12	7.05386e+07	3.41637e+07	P62857	40S ribosomal protein S28 (Small ribosomal subunit protein eS28)	cytoplasmic translation [GO:0002181]; maturation of SSU-rRNA [GO:0030490]; ribosomal small subunit assembly [GO:0000028]; ribosomal small subunit biogenesis [GO:0042274]; ribosome biogenesis [GO:0042254]; rRNA processing [GO:0006364]; translation [GO:0006412]	cytoplasm [GO:0005737]; cytoplasmic side of rough endoplasmic reticulum membrane [GO:0098556]; cytosol [GO:0005829]; cytosolic small ribosomal subunit [GO:0022627]; extracellular exosome [GO:0070062]; nucleolus [GO:0005730]; nucleoplasm [GO:0005654]; polysomal ribosome [GO:0042788]; small ribosomal subunit [GO:0015935]; small-subunit processome [GO:0032040]; synapse [GO:0045202]	cytoplasm [GO:0005737]; cytoplasmic side of rough endoplasmic reticulum membrane [GO:0098556]; cytosol [GO:0005829]; cytosolic small ribosomal subunit [GO:0022627]; extracellular exosome [GO:0070062]; nucleolus [GO:0005730]; nucleoplasm [GO:0005654]; polysomal ribosome [GO:0042788]; small ribosomal subunit [GO:0015935]; small-subunit processome [GO:0032040]; synapse [GO:0045202]; RNA binding [GO:…	RNA binding [GO:0003723]; structural constituent of ribosome [GO:0003735]	GO:0000028; GO:0002181; GO:0003723; GO:0003735; GO:0005654; GO:0005730; GO:0005737; GO:0005829; GO:0006364; GO:0006412; GO:0015935; GO:0022627; GO:0030490; GO:0032040; GO:0042254; GO:0042274; GO:0042788; GO:0045202; GO:0070062; GO:0098556
sp|P63173|RL38_HUMAN	RL38_HUMAN	26952000	34885000	8170900	95593000	183750000	210160000	13060000	12829000	10612000	137420000	89342000	12899000	12	6.96394e+07	7.28411e+07	P63173	60S ribosomal protein L38 (Large ribosomal subunit protein eL38)	90S preribosome assembly [GO:0034463]; axial mesoderm development [GO:0048318]; cytoplasmic translation [GO:0002181]; middle ear morphogenesis [GO:0042474]; ossification [GO:0001503]; regulation of translation [GO:0006417]; ribonucleoprotein complex assembly [GO:0022618]; sensory perception of sound [GO:0007605]; skeletal system development [GO:0001501]; translation [GO:0006412]	cytoplasm [GO:0005737]; cytosol [GO:0005829]; cytosolic large ribosomal subunit [GO:0022625]; cytosolic ribosome [GO:0022626]; eukaryotic 80S initiation complex [GO:0033291]; focal adhesion [GO:0005925]; polysomal ribosome [GO:0042788]; postsynaptic density [GO:0014069]	cytoplasm [GO:0005737]; cytosol [GO:0005829]; cytosolic large ribosomal subunit [GO:0022625]; cytosolic ribosome [GO:0022626]; eukaryotic 80S initiation complex [GO:0033291]; focal adhesion [GO:0005925]; polysomal ribosome [GO:0042788]; postsynaptic density [GO:0014069]; RNA binding [GO:0003723]; structural constituent of ribosome [GO:0003735]; 90S preribosome assembly [GO:0034463]; axial mesoder…	RNA binding [GO:0003723]; structural constituent of ribosome [GO:0003735]	GO:0001501; GO:0001503; GO:0002181; GO:0003723; GO:0003735; GO:0005737; GO:0005829; GO:0005925; GO:0006412; GO:0006417; GO:0007605; GO:0014069; GO:0022618; GO:0022625; GO:0022626; GO:0033291; GO:0034463; GO:0042474; GO:0042788; GO:0048318
sp|P13639|EF2_HUMAN	EF2_HUMAN	94324000	59057000	1316400	65935000	48503000	83107000	103510000	92236000	2345600	147050000	95934000	41801000	12	69593250	4.22936e+07	P13639	Elongation factor 2 (EF-2)	hematopoietic progenitor cell differentiation [GO:0002244]; positive regulation of translation [GO:0045727]; translational elongation [GO:0006414]	aggresome [GO:0016235]; cytoplasm [GO:0005737]; cytosol [GO:0005829]; extracellular exosome [GO:0070062]; extracellular region [GO:0005576]; ficolin-1-rich granule lumen [GO:1904813]; membrane [GO:0016020]; nucleus [GO:0005634]; plasma membrane [GO:0005886]; polysome [GO:0005844]; ribonucleoprotein complex [GO:1990904]; secretory granule lumen [GO:0034774]; synapse [GO:0045202]	aggresome [GO:0016235]; cytoplasm [GO:0005737]; cytosol [GO:0005829]; extracellular exosome [GO:0070062]; extracellular region [GO:0005576]; ficolin-1-rich granule lumen [GO:1904813]; membrane [GO:0016020]; nucleus [GO:0005634]; plasma membrane [GO:0005886]; polysome [GO:0005844]; ribonucleoprotein complex [GO:1990904]; secretory granule lumen [GO:0034774]; synapse [GO:0045202]; cadherin binding …	cadherin binding [GO:0045296]; GTP binding [GO:0005525]; GTPase activity [GO:0003924]; protein kinase binding [GO:0019901]; ribosome binding [GO:0043022]; RNA binding [GO:0003723]; translation elongation factor activity [GO:0003746]	GO:0002244; GO:0003723; GO:0003746; GO:0003924; GO:0005525; GO:0005576; GO:0005634; GO:0005737; GO:0005829; GO:0005844; GO:0005886; GO:0006414; GO:0016020; GO:0016235; GO:0019901; GO:0034774; GO:0043022; GO:0045202; GO:0045296; GO:0045727; GO:0070062; GO:1904813; GO:1990904
sp|P62847|RS24_HUMAN	RS24_HUMAN	83426000	74300000	13702000	28900000	68771000	51707000	88068000	124000000	28053000	28386000	143980000	99415000	12	6.93923e+07	4.09669e+07	P62847	40S ribosomal protein S24 (Small ribosomal subunit protein eS24)	cytoplasmic translation [GO:0002181]; erythrocyte homeostasis [GO:0034101]; ribosomal small subunit biogenesis [GO:0042274]; rRNA processing [GO:0006364]; translation [GO:0006412]	cytoplasm [GO:0005737]; cytosol [GO:0005829]; cytosolic ribosome [GO:0022626]; cytosolic small ribosomal subunit [GO:0022627]; endoplasmic reticulum [GO:0005783]; membrane [GO:0016020]; nucleolus [GO:0005730]; nucleoplasm [GO:0005654]; nucleus [GO:0005634]; small ribosomal subunit [GO:0015935]; small-subunit processome [GO:0032040]	cytoplasm [GO:0005737]; cytosol [GO:0005829]; cytosolic ribosome [GO:0022626]; cytosolic small ribosomal subunit [GO:0022627]; endoplasmic reticulum [GO:0005783]; membrane [GO:0016020]; nucleolus [GO:0005730]; nucleoplasm [GO:0005654]; nucleus [GO:0005634]; small ribosomal subunit [GO:0015935]; small-subunit processome [GO:0032040]; RNA binding [GO:0003723]; structural constituent of ribosome [GO…	RNA binding [GO:0003723]; structural constituent of ribosome [GO:0003735]; translation initiation factor binding [GO:0031369]	GO:0002181; GO:0003723; GO:0003735; GO:0005634; GO:0005654; GO:0005730; GO:0005737; GO:0005783; GO:0005829; GO:0006364; GO:0006412; GO:0015935; GO:0016020; GO:0022626; GO:0022627; GO:0031369; GO:0032040; GO:0034101; GO:0042274
sp|P46778|RL21_HUMAN	RL21_HUMAN	57935000	41907000	5473500	31029000	67732000	73735000	141030000	179860000	11035000	72667000	78403000	63186000	12	6.8666e+07	4.98456e+07	P46778	60S ribosomal protein L21 (Large ribosomal subunit protein eL21)	cytoplasmic translation [GO:0002181]; translation [GO:0006412]	cytoplasm [GO:0005737]; cytosol [GO:0005829]; cytosolic large ribosomal subunit [GO:0022625]; cytosolic ribosome [GO:0022626]; endoplasmic reticulum [GO:0005783]; membrane [GO:0016020]	cytoplasm [GO:0005737]; cytosol [GO:0005829]; cytosolic large ribosomal subunit [GO:0022625]; cytosolic ribosome [GO:0022626]; endoplasmic reticulum [GO:0005783]; membrane [GO:0016020]; RNA binding [GO:0003723]; structural constituent of ribosome [GO:0003735]; cytoplasmic translation [GO:0002181]; translation [GO:0006412]	RNA binding [GO:0003723]; structural constituent of ribosome [GO:0003735]	GO:0002181; GO:0003723; GO:0003735; GO:0005737; GO:0005783; GO:0005829; GO:0006412; GO:0016020; GO:0022625; GO:0022626
sp|P63244|RACK1_HUMAN	RACK1_HUMAN	47088000	36623000	64735000	28709000	87393000	84032000	46574000	33541000	161660000	61079000	104800000	53301000	12	67461250	3.77104e+07	P63244	Receptor of activated protein C kinase 1 (Cell proliferation-inducing gene 21 protein) (Guanine nucleotide-binding protein subunit beta-2-like 1) (Guanine nucleotide-binding protein subunit beta-like protein 12.3) (Human lung cancer oncogene 7 protein) (HLC-7) (Receptor for activated C kinase) (Small ribosomal subunit protein RACK1) [Cleaved into: Receptor of activated protein C kinase 1, N-termi…	activation of cysteine-type endopeptidase activity involved in apoptotic process [GO:0006919]; cell cycle [GO:0007049]; cellular response to glucose stimulus [GO:0071333]; cellular response to growth factor stimulus [GO:0071363]; cytoplasmic translation [GO:0002181]; gastrulation [GO:0007369]; negative regulation of cell growth [GO:0030308]; negative regulation of endoplasmic reticulum unfolded p…	cytoplasm [GO:0005737]; cytosol [GO:0005829]; cytosolic small ribosomal subunit [GO:0022627]; dendrite [GO:0030425]; extracellular exosome [GO:0070062]; IRE1-RACK1-PP2A complex [GO:1990630]; midbody [GO:0030496]; mitochondrion [GO:0005739]; neuronal cell body [GO:0043025]; nucleoplasm [GO:0005654]; nucleus [GO:0005634]; perikaryon [GO:0043204]; perinuclear region of cytoplasm [GO:0048471]; phagoc…	cytoplasm [GO:0005737]; cytosol [GO:0005829]; cytosolic small ribosomal subunit [GO:0022627]; dendrite [GO:0030425]; extracellular exosome [GO:0070062]; IRE1-RACK1-PP2A complex [GO:1990630]; midbody [GO:0030496]; mitochondrion [GO:0005739]; neuronal cell body [GO:0043025]; nucleoplasm [GO:0005654]; nucleus [GO:0005634]; perikaryon [GO:0043204]; perinuclear region of cytoplasm [GO:0048471]; phagoc…	BH3 domain binding [GO:0051434]; cadherin binding [GO:0045296]; cyclin binding [GO:0030332]; cysteine-type endopeptidase activator activity involved in apoptotic process [GO:0008656]; enzyme binding [GO:0019899]; ion channel inhibitor activity [GO:0008200]; molecular adaptor activity [GO:0060090]; protein homodimerization activity [GO:0042803]; protein kinase C binding [GO:0005080]; protein phosp…	GO:0001891; GO:0001934; GO:0002181; GO:0003723; GO:0005080; GO:0005102; GO:0005634; GO:0005654; GO:0005737; GO:0005739; GO:0005829; GO:0006919; GO:0007049; GO:0007369; GO:0008200; GO:0008656; GO:0010629; GO:0015935; GO:0016567; GO:0017148; GO:0019899; GO:0019903; GO:0022627; GO:0030178; GO:0030292; GO:0030308; GO:0030332; GO:0030335; GO:0030425; GO:0030496; GO:0030971; GO:0031334; GO:0032091; GO:…
sp|P62266|RS23_HUMAN	RS23_HUMAN	42865000	48725000	19508000	32011000	93845000	78957000	111450000	95544000	45407000	61121000	101340000	75770000	12	6.72119e+07	2.98585e+07	P62266	40S ribosomal protein S23 (Small ribosomal subunit protein uS12)	cytoplasmic translation [GO:0002181]; maintenance of translational fidelity [GO:1990145]; ribosomal small subunit biogenesis [GO:0042274]; stress granule assembly [GO:0034063]; translation [GO:0006412]	cytoplasm [GO:0005737]; cytosol [GO:0005829]; cytosolic ribosome [GO:0022626]; cytosolic small ribosomal subunit [GO:0022627]; endoplasmic reticulum [GO:0005783]; membrane [GO:0016020]; nucleolus [GO:0005730]; nucleoplasm [GO:0005654]; polysomal ribosome [GO:0042788]; ribosome [GO:0005840]; rough endoplasmic reticulum [GO:0005791]; small-subunit processome [GO:0032040]	cytoplasm [GO:0005737]; cytosol [GO:0005829]; cytosolic ribosome [GO:0022626]; cytosolic small ribosomal subunit [GO:0022627]; endoplasmic reticulum [GO:0005783]; membrane [GO:0016020]; nucleolus [GO:0005730]; nucleoplasm [GO:0005654]; polysomal ribosome [GO:0042788]; ribosome [GO:0005840]; rough endoplasmic reticulum [GO:0005791]; small-subunit processome [GO:0032040]; RNA binding [GO:0003723]; …	RNA binding [GO:0003723]; structural constituent of ribosome [GO:0003735]	GO:0002181; GO:0003723; GO:0003735; GO:0005654; GO:0005730; GO:0005737; GO:0005783; GO:0005791; GO:0005829; GO:0005840; GO:0006412; GO:0016020; GO:0022626; GO:0022627; GO:0032040; GO:0034063; GO:0042274; GO:0042788; GO:1990145
sp|P46779|RL28_HUMAN	RL28_HUMAN	43377000	26633000	4256100	20813000	46792000	35887000	114450000	274110000	16813000	38316000	93184000	64171000	12	64900175	7.30891e+07	P46779	60S ribosomal protein L28 (Large ribosomal subunit protein eL28)	cytoplasmic translation [GO:0002181]; translation [GO:0006412]	cell body [GO:0044297]; cytoplasm [GO:0005737]; cytoplasmic ribonucleoprotein granule [GO:0036464]; cytosol [GO:0005829]; cytosolic large ribosomal subunit [GO:0022625]; cytosolic ribosome [GO:0022626]; dendrite [GO:0030425]; extracellular exosome [GO:0070062]; membrane [GO:0016020]; synapse [GO:0045202]	cell body [GO:0044297]; cytoplasm [GO:0005737]; cytoplasmic ribonucleoprotein granule [GO:0036464]; cytosol [GO:0005829]; cytosolic large ribosomal subunit [GO:0022625]; cytosolic ribosome [GO:0022626]; dendrite [GO:0030425]; extracellular exosome [GO:0070062]; membrane [GO:0016020]; synapse [GO:0045202]; RNA binding [GO:0003723]; structural constituent of ribosome [GO:0003735]; cytoplasmic trans…	RNA binding [GO:0003723]; structural constituent of ribosome [GO:0003735]	GO:0002181; GO:0003723; GO:0003735; GO:0005737; GO:0005829; GO:0006412; GO:0016020; GO:0022625; GO:0022626; GO:0030425; GO:0036464; GO:0044297; GO:0045202; GO:0070062
sp|P31947|1433S_HUMAN	1433S_HUMAN	49057000	40725000	16141000	56492000	44631000	90825000	88562000	177850000	17233000	112360000	46590000	34894000	12	6.46133e+07	4.6165e+07	P31947	14-3-3 protein sigma (Epithelial cell marker protein 1) (Stratifin)	establishment of skin barrier [GO:0061436]; intrinsic apoptotic signaling pathway in response to DNA damage [GO:0008630]; keratinization [GO:0031424]; keratinocyte development [GO:0003334]; keratinocyte proliferation [GO:0043616]; negative regulation of cysteine-type endopeptidase activity involved in apoptotic process [GO:0043154]; negative regulation of keratinocyte proliferation [GO:0010839]; …	cytoplasm [GO:0005737]; cytosol [GO:0005829]; extracellular exosome [GO:0070062]; extracellular space [GO:0005615]; nucleus [GO:0005634]	cytoplasm [GO:0005737]; cytosol [GO:0005829]; extracellular exosome [GO:0070062]; extracellular space [GO:0005615]; nucleus [GO:0005634]; cadherin binding [GO:0045296]; identical protein binding [GO:0042802]; phosphoprotein binding [GO:0051219]; protein kinase binding [GO:0019901]; protein kinase C inhibitor activity [GO:0008426]; establishment of skin barrier [GO:0061436]; intrinsic apoptotic si…	cadherin binding [GO:0045296]; identical protein binding [GO:0042802]; phosphoprotein binding [GO:0051219]; protein kinase binding [GO:0019901]; protein kinase C inhibitor activity [GO:0008426]	GO:0000079; GO:0000122; GO:0001836; GO:0003334; GO:0005615; GO:0005634; GO:0005737; GO:0005829; GO:0006469; GO:0006611; GO:0007165; GO:0008426; GO:0008630; GO:0010482; GO:0010737; GO:0010839; GO:0019901; GO:0030307; GO:0031424; GO:0042802; GO:0043154; GO:0043616; GO:0045296; GO:0045606; GO:0046827; GO:0051219; GO:0061436; GO:0070062; GO:0072089; GO:2000647
sp|P62861|RS30_HUMAN	RS30_HUMAN	35390000	32649000	26583000	22851000	117100000	100940000	110100000	48195000	40006000	55720000	102590000	78072000	12	64183000	3.54002e+07	P62861	40S ribosomal protein S30 (Small ribosomal subunit protein eS30)	antibacterial humoral response [GO:0019731]; antimicrobial humoral immune response mediated by antimicrobial peptide [GO:0061844]; cytoplasmic translation [GO:0002181]; defense response to Gram-positive bacterium [GO:0050830]; innate immune response in mucosa [GO:0002227]; ribosomal small subunit assembly [GO:0000028]; translation [GO:0006412]	cytoplasm [GO:0005737]; cytosol [GO:0005829]; cytosolic ribosome [GO:0022626]; cytosolic small ribosomal subunit [GO:0022627]; extracellular space [GO:0005615]; nucleoplasm [GO:0005654]; nucleus [GO:0005634]; small ribosomal subunit [GO:0015935]	cytoplasm [GO:0005737]; cytosol [GO:0005829]; cytosolic ribosome [GO:0022626]; cytosolic small ribosomal subunit [GO:0022627]; extracellular space [GO:0005615]; nucleoplasm [GO:0005654]; nucleus [GO:0005634]; small ribosomal subunit [GO:0015935]; RNA binding [GO:0003723]; structural constituent of ribosome [GO:0003735]; antibacterial humoral response [GO:0019731]; antimicrobial humoral immune res…	RNA binding [GO:0003723]; structural constituent of ribosome [GO:0003735]	GO:0000028; GO:0002181; GO:0002227; GO:0003723; GO:0003735; GO:0005615; GO:0005634; GO:0005654; GO:0005737; GO:0005829; GO:0006412; GO:0015935; GO:0019731; GO:0022626; GO:0022627; GO:0050830; GO:0061844
sp|P62269|RS18_HUMAN	RS18_HUMAN	32399000	27727000	7369400	31633000	83684000	85151000	54459000	269330000	22486000	59083000	59664000	35532000	12	6.40431e+07	6.89084e+07	P62269	40S ribosomal protein S18 (Ke-3) (Ke3) (Small ribosomal subunit protein uS13)	cytoplasmic translation [GO:0002181]; translation [GO:0006412]	cytoplasm [GO:0005737]; cytosol [GO:0005829]; cytosolic ribosome [GO:0022626]; cytosolic small ribosomal subunit [GO:0022627]; extracellular exosome [GO:0070062]; focal adhesion [GO:0005925]; membrane [GO:0016020]; nucleoplasm [GO:0005654]; nucleus [GO:0005634]; postsynaptic density [GO:0014069]; ribosome [GO:0005840]; small ribosomal subunit [GO:0015935]	cytoplasm [GO:0005737]; cytosol [GO:0005829]; cytosolic ribosome [GO:0022626]; cytosolic small ribosomal subunit [GO:0022627]; extracellular exosome [GO:0070062]; focal adhesion [GO:0005925]; membrane [GO:0016020]; nucleoplasm [GO:0005654]; nucleus [GO:0005634]; postsynaptic density [GO:0014069]; ribosome [GO:0005840]; small ribosomal subunit [GO:0015935]; RNA binding [GO:0003723]; rRNA binding […	RNA binding [GO:0003723]; rRNA binding [GO:0019843]; structural constituent of ribosome [GO:0003735]	GO:0002181; GO:0003723; GO:0003735; GO:0005634; GO:0005654; GO:0005737; GO:0005829; GO:0005840; GO:0005925; GO:0006412; GO:0014069; GO:0015935; GO:0016020; GO:0019843; GO:0022626; GO:0022627; GO:0070062
sp|P39023|RL3_HUMAN	RL3_HUMAN	41236000	37380000	4345300	31075000	50568000	60072000	114930000	175520000	25717000	44744000	102940000	53803000	12	6.18609e+07	4.71918e+07	P39023	60S ribosomal protein L3 (HIV-1 TAR RNA-binding protein B) (TARBP-B) (Large ribosomal subunit protein uL3)	cellular response to interleukin-4 [GO:0071353]; cytoplasmic translation [GO:0002181]; translation [GO:0006412]	cytoplasm [GO:0005737]; cytosol [GO:0005829]; cytosolic large ribosomal subunit [GO:0022625]; cytosolic ribosome [GO:0022626]; extracellular exosome [GO:0070062]; focal adhesion [GO:0005925]; nucleolus [GO:0005730]; nucleus [GO:0005634]; protein-containing complex [GO:0032991]; synapse [GO:0045202]	cytoplasm [GO:0005737]; cytosol [GO:0005829]; cytosolic large ribosomal subunit [GO:0022625]; cytosolic ribosome [GO:0022626]; extracellular exosome [GO:0070062]; focal adhesion [GO:0005925]; nucleolus [GO:0005730]; nucleus [GO:0005634]; protein-containing complex [GO:0032991]; synapse [GO:0045202]; 5S rRNA binding [GO:0008097]; RNA binding [GO:0003723]; structural constituent of ribosome [GO:000…	5S rRNA binding [GO:0008097]; RNA binding [GO:0003723]; structural constituent of ribosome [GO:0003735]	GO:0002181; GO:0003723; GO:0003735; GO:0005634; GO:0005730; GO:0005737; GO:0005829; GO:0005925; GO:0006412; GO:0008097; GO:0022625; GO:0022626; GO:0032991; GO:0045202; GO:0070062; GO:0071353
sp|P62701|RS4X_HUMAN	RS4X_HUMAN	51915000	40591000	3339100	42376000	87252000	83456000	86927000	113670000	11157000	63252000	87476000	65733000	12	61428675	3.30579e+07	P62701	40S ribosomal protein S4, X isoform (SCR10) (Single copy abundant mRNA protein) (Small ribosomal subunit protein eS4)	cytoplasmic translation [GO:0002181]; positive regulation of cell population proliferation [GO:0008284]; positive regulation of translation [GO:0045727]; ribosomal small subunit biogenesis [GO:0042274]; translation [GO:0006412]	cytoplasmic ribonucleoprotein granule [GO:0036464]; cytosol [GO:0005829]; cytosolic ribosome [GO:0022626]; cytosolic small ribosomal subunit [GO:0022627]; extracellular exosome [GO:0070062]; focal adhesion [GO:0005925]; membrane [GO:0016020]; nucleolus [GO:0005730]; nucleoplasm [GO:0005654]; polysome [GO:0005844]; ribonucleoprotein complex [GO:1990904]; ribosome [GO:0005840]; small ribosomal subu…	cytoplasmic ribonucleoprotein granule [GO:0036464]; cytosol [GO:0005829]; cytosolic ribosome [GO:0022626]; cytosolic small ribosomal subunit [GO:0022627]; extracellular exosome [GO:0070062]; focal adhesion [GO:0005925]; membrane [GO:0016020]; nucleolus [GO:0005730]; nucleoplasm [GO:0005654]; polysome [GO:0005844]; ribonucleoprotein complex [GO:1990904]; ribosome [GO:0005840]; small ribosomal subu…	RNA binding [GO:0003723]; rRNA binding [GO:0019843]; structural constituent of ribosome [GO:0003735]	GO:0002181; GO:0003723; GO:0003735; GO:0005654; GO:0005730; GO:0005829; GO:0005840; GO:0005844; GO:0005925; GO:0006412; GO:0008284; GO:0015935; GO:0016020; GO:0019843; GO:0022626; GO:0022627; GO:0032040; GO:0036464; GO:0042274; GO:0045202; GO:0045727; GO:0070062; GO:1990904
sp|P14174|MIF_HUMAN	MIF_HUMAN	56116000	52549000	2314900	64768000	49665000	93367000	84323000	48713000	3821600	108470000	81137000	88542000	12	61148875	3.31813e+07	P14174	Macrophage migration inhibitory factor (MIF) (EC 5.3.2.1) (Glycosylation-inhibiting factor) (GIF) (L-dopachrome isomerase) (L-dopachrome tautomerase) (EC 5.3.3.12) (Phenylpyruvate tautomerase)	carboxylic acid metabolic process [GO:0019752]; cell surface receptor signaling pathway [GO:0007166]; cellular senescence [GO:0090398]; DNA damage response, signal transduction by p53 class mediator [GO:0030330]; inflammatory response [GO:0006954]; innate immune response [GO:0045087]; negative regulation of apoptotic process [GO:0043066]; negative regulation of cell migration [GO:0030336]; negati…	cell surface [GO:0009986]; cytoplasm [GO:0005737]; cytosol [GO:0005829]; extracellular exosome [GO:0070062]; extracellular region [GO:0005576]; extracellular space [GO:0005615]; ficolin-1-rich granule lumen [GO:1904813]; nucleoplasm [GO:0005654]; plasma membrane [GO:0005886]; secretory granule lumen [GO:0034774]; vesicle [GO:0031982]	cell surface [GO:0009986]; cytoplasm [GO:0005737]; cytosol [GO:0005829]; extracellular exosome [GO:0070062]; extracellular region [GO:0005576]; extracellular space [GO:0005615]; ficolin-1-rich granule lumen [GO:1904813]; nucleoplasm [GO:0005654]; plasma membrane [GO:0005886]; secretory granule lumen [GO:0034774]; vesicle [GO:0031982]; chemoattractant activity [GO:0042056]; cytokine activity [GO:0…	chemoattractant activity [GO:0042056]; cytokine activity [GO:0005125]; cytokine receptor binding [GO:0005126]; dopachrome isomerase activity [GO:0004167]; identical protein binding [GO:0042802]; phenylpyruvate tautomerase activity [GO:0050178]; protease binding [GO:0002020]	GO:0001516; GO:0001819; GO:0002020; GO:0002906; GO:0004167; GO:0005125; GO:0005126; GO:0005576; GO:0005615; GO:0005654; GO:0005737; GO:0005829; GO:0005886; GO:0006954; GO:0007166; GO:0008284; GO:0009986; GO:0010629; GO:0010739; GO:0010760; GO:0019752; GO:0030330; GO:0030336; GO:0030890; GO:0031666; GO:0031982; GO:0032760; GO:0033033; GO:0033138; GO:0034774; GO:0042056; GO:0042327; GO:0042802; GO:…
sp|P49207|RL34_HUMAN	RL34_HUMAN	56933000	37725000	4349100	21057000	40242000	54327000	130710000	200730000	23860000	25863000	86152000	49961000	12	60992425	5.52604e+07	P49207	60S ribosomal protein L34 (Large ribosomal subunit protein eL34)	cytoplasmic translation [GO:0002181]; translation [GO:0006412]	cytoplasm [GO:0005737]; cytosol [GO:0005829]; cytosolic large ribosomal subunit [GO:0022625]; cytosolic ribosome [GO:0022626]; endoplasmic reticulum [GO:0005783]; extracellular exosome [GO:0070062]; nucleolus [GO:0005730]; synapse [GO:0045202]	cytoplasm [GO:0005737]; cytosol [GO:0005829]; cytosolic large ribosomal subunit [GO:0022625]; cytosolic ribosome [GO:0022626]; endoplasmic reticulum [GO:0005783]; extracellular exosome [GO:0070062]; nucleolus [GO:0005730]; synapse [GO:0045202]; cadherin binding [GO:0045296]; RNA binding [GO:0003723]; structural constituent of ribosome [GO:0003735]; cytoplasmic translation [GO:0002181]; translatio…	cadherin binding [GO:0045296]; RNA binding [GO:0003723]; structural constituent of ribosome [GO:0003735]	GO:0002181; GO:0003723; GO:0003735; GO:0005730; GO:0005737; GO:0005783; GO:0005829; GO:0006412; GO:0022625; GO:0022626; GO:0045202; GO:0045296; GO:0070062
sp|P35268|RL22_HUMAN	RL22_HUMAN	51655000	40870000	14411000	63081000	131630000	111090000	34341000	59557000	22394000	104140000	51710000	36219000	12	60091500	3.68286e+07	P35268	60S ribosomal protein L22 (EBER-associated protein) (EAP) (Epstein-Barr virus small RNA-associated protein) (Heparin-binding protein HBp15) (Large ribosomal subunit protein eL22)	alpha-beta T cell differentiation [GO:0046632]; cytoplasmic translation [GO:0002181]; translation [GO:0006412]; translation at presynapse [GO:0140236]	cytoplasm [GO:0005737]; cytosol [GO:0005829]; cytosolic large ribosomal subunit [GO:0022625]; cytosolic ribosome [GO:0022626]; extracellular exosome [GO:0070062]; focal adhesion [GO:0005925]; glutamatergic synapse [GO:0098978]; nucleus [GO:0005634]; presynapse [GO:0098793]; ribonucleoprotein complex [GO:1990904]	cytoplasm [GO:0005737]; cytosol [GO:0005829]; cytosolic large ribosomal subunit [GO:0022625]; cytosolic ribosome [GO:0022626]; extracellular exosome [GO:0070062]; focal adhesion [GO:0005925]; glutamatergic synapse [GO:0098978]; nucleus [GO:0005634]; presynapse [GO:0098793]; ribonucleoprotein complex [GO:1990904]; heparin binding [GO:0008201]; identical protein binding [GO:0042802]; RNA binding [G…	heparin binding [GO:0008201]; identical protein binding [GO:0042802]; RNA binding [GO:0003723]; structural constituent of ribosome [GO:0003735]	GO:0002181; GO:0003723; GO:0003735; GO:0005634; GO:0005737; GO:0005829; GO:0005925; GO:0006412; GO:0008201; GO:0022625; GO:0022626; GO:0042802; GO:0046632; GO:0070062; GO:0098793; GO:0098978; GO:0140236; GO:1990904
sp|P04075|ALDOA_HUMAN	ALDOA_HUMAN	41497000	40192000	4243900	56142000	56707000	87224000	84041000	114670000	10125000	109540000	58234000	52451000	12	5.95889e+07	3.46107e+07	P04075	Fructose-bisphosphate aldolase A (EC 4.1.2.13) (Lung cancer antigen NY-LU-1) (Muscle-type aldolase)	actin filament organization [GO:0007015]; ATP biosynthetic process [GO:0006754]; binding of sperm to zona pellucida [GO:0007339]; fructose 1,6-bisphosphate metabolic process [GO:0030388]; fructose metabolic process [GO:0006000]; glycolytic process [GO:0006096]; muscle cell cellular homeostasis [GO:0046716]; protein homotetramerization [GO:0051289]; regulation of cell shape [GO:0008360]; striated …	actin cytoskeleton [GO:0015629]; cytosol [GO:0005829]; extracellular exosome [GO:0070062]; extracellular region [GO:0005576]; extracellular space [GO:0005615]; ficolin-1-rich granule lumen [GO:1904813]; I band [GO:0031674]; M band [GO:0031430]; membrane [GO:0016020]; nucleus [GO:0005634]; platelet alpha granule lumen [GO:0031093]; secretory granule lumen [GO:0034774]; sperm head [GO:0061827]; ter…	actin cytoskeleton [GO:0015629]; cytosol [GO:0005829]; extracellular exosome [GO:0070062]; extracellular region [GO:0005576]; extracellular space [GO:0005615]; ficolin-1-rich granule lumen [GO:1904813]; I band [GO:0031674]; M band [GO:0031430]; membrane [GO:0016020]; nucleus [GO:0005634]; platelet alpha granule lumen [GO:0031093]; secretory granule lumen [GO:0034774]; sperm head [GO:0061827]; ter…	actin binding [GO:0003779]; cadherin binding [GO:0045296]; cytoskeletal protein binding [GO:0008092]; fructose binding [GO:0070061]; fructose-bisphosphate aldolase activity [GO:0004332]; identical protein binding [GO:0042802]; RNA binding [GO:0003723]; tubulin binding [GO:0015631]	GO:0003723; GO:0003779; GO:0004332; GO:0005576; GO:0005615; GO:0005634; GO:0005829; GO:0006000; GO:0006096; GO:0006754; GO:0006941; GO:0007015; GO:0007339; GO:0008092; GO:0008360; GO:0015629; GO:0015631; GO:0016020; GO:0030388; GO:0031093; GO:0031430; GO:0031674; GO:0034774; GO:0042802; GO:0045296; GO:0046716; GO:0051289; GO:0061827; GO:0070061; GO:0070062; GO:1904724; GO:1904813
sp|P36578|RL4_HUMAN	RL4_HUMAN	23552000	22101000	6776600	33801000	71311000	72482000	120560000	172510000	20429000	50564000	70648000	40422000	12	58763050	4.76988e+07	P36578	60S ribosomal protein L4 (60S ribosomal protein L1) (Large ribosomal subunit protein uL4)	cytoplasmic translation [GO:0002181]; translation [GO:0006412]	cytoplasm [GO:0005737]; cytosol [GO:0005829]; cytosolic large ribosomal subunit [GO:0022625]; cytosolic ribosome [GO:0022626]; extracellular exosome [GO:0070062]; focal adhesion [GO:0005925]; membrane [GO:0016020]; nucleolus [GO:0005730]; nucleus [GO:0005634]; ribonucleoprotein complex [GO:1990904]; rough endoplasmic reticulum [GO:0005791]	cytoplasm [GO:0005737]; cytosol [GO:0005829]; cytosolic large ribosomal subunit [GO:0022625]; cytosolic ribosome [GO:0022626]; extracellular exosome [GO:0070062]; focal adhesion [GO:0005925]; membrane [GO:0016020]; nucleolus [GO:0005730]; nucleus [GO:0005634]; ribonucleoprotein complex [GO:1990904]; rough endoplasmic reticulum [GO:0005791]; RNA binding [GO:0003723]; structural constituent of ribo…	RNA binding [GO:0003723]; structural constituent of ribosome [GO:0003735]	GO:0002181; GO:0003723; GO:0003735; GO:0005634; GO:0005730; GO:0005737; GO:0005791; GO:0005829; GO:0005925; GO:0006412; GO:0016020; GO:0022625; GO:0022626; GO:0070062; GO:1990904
sp|P46776|RL27A_HUMAN	RL27A_HUMAN	35187000	30329000	4312500	35042000	86382000	90652000	104770000	100990000	11802000	77388000	61885000	62220000	12	5.84133e+07	3.45672e+07	P46776	60S ribosomal protein L27a (Large ribosomal subunit protein uL15)	cytoplasmic translation [GO:0002181]; translation [GO:0006412]	cytoplasm [GO:0005737]; cytosol [GO:0005829]; cytosolic large ribosomal subunit [GO:0022625]; cytosolic ribosome [GO:0022626]; endoplasmic reticulum [GO:0005783]; membrane [GO:0016020]; synapse [GO:0045202]	cytoplasm [GO:0005737]; cytosol [GO:0005829]; cytosolic large ribosomal subunit [GO:0022625]; cytosolic ribosome [GO:0022626]; endoplasmic reticulum [GO:0005783]; membrane [GO:0016020]; synapse [GO:0045202]; RNA binding [GO:0003723]; structural constituent of ribosome [GO:0003735]; cytoplasmic translation [GO:0002181]; translation [GO:0006412]	RNA binding [GO:0003723]; structural constituent of ribosome [GO:0003735]	GO:0002181; GO:0003723; GO:0003735; GO:0005737; GO:0005783; GO:0005829; GO:0006412; GO:0016020; GO:0022625; GO:0022626; GO:0045202
sp|Q02878|RL6_HUMAN	RL6_HUMAN	33367000	20266000	24195000	21672000	90090000	62674000	92768000	171760000	47236000	45829000	45237000	43111000	12	58183750	4.30043e+07	Q02878	60S ribosomal protein L6 (Large ribosomal subunit protein eL6) (Neoplasm-related protein C140) (Tax-responsive enhancer element-binding protein 107) (TaxREB107)	cytoplasmic translation [GO:0002181]; regulation of DNA-templated transcription [GO:0006355]; ribosomal large subunit assembly [GO:0000027]; translation [GO:0006412]	cytoplasm [GO:0005737]; cytoplasmic ribonucleoprotein granule [GO:0036464]; cytosol [GO:0005829]; cytosolic large ribosomal subunit [GO:0022625]; cytosolic ribosome [GO:0022626]; focal adhesion [GO:0005925]; membrane [GO:0016020]; nucleus [GO:0005634]; polysomal ribosome [GO:0042788]; postsynaptic density [GO:0014069]; rough endoplasmic reticulum [GO:0005791]	cytoplasm [GO:0005737]; cytoplasmic ribonucleoprotein granule [GO:0036464]; cytosol [GO:0005829]; cytosolic large ribosomal subunit [GO:0022625]; cytosolic ribosome [GO:0022626]; focal adhesion [GO:0005925]; membrane [GO:0016020]; nucleus [GO:0005634]; polysomal ribosome [GO:0042788]; postsynaptic density [GO:0014069]; rough endoplasmic reticulum [GO:0005791]; cadherin binding [GO:0045296]; DNA b…	cadherin binding [GO:0045296]; DNA binding [GO:0003677]; RNA binding [GO:0003723]; structural constituent of ribosome [GO:0003735]	GO:0000027; GO:0002181; GO:0003677; GO:0003723; GO:0003735; GO:0005634; GO:0005737; GO:0005791; GO:0005829; GO:0005925; GO:0006355; GO:0006412; GO:0014069; GO:0016020; GO:0022625; GO:0022626; GO:0036464; GO:0042788; GO:0045296
sp|P61254|RL26_HUMAN	RL26_HUMAN	37429000	21010000	10452000	29199000	86218000	64259000	116970000	149790000	23463000	35228000	55967000	39767000	12	5.58127e+07	4.2223e+07	P61254	60S ribosomal protein L26 (Large ribosomal subunit protein uL24)	cellular response to gamma radiation [GO:0071480]; cellular response to UV [GO:0034644]; cytoplasmic translation [GO:0002181]; DNA damage response, signal transduction by p53 class mediator resulting in cell cycle arrest [GO:0006977]; positive regulation of DNA damage response, signal transduction by p53 class mediator resulting in transcription of p21 class mediator [GO:1902164]; positive regula…	cytoplasm [GO:0005737]; cytosol [GO:0005829]; cytosolic large ribosomal subunit [GO:0022625]; cytosolic ribosome [GO:0022626]; extracellular exosome [GO:0070062]; membrane [GO:0016020]; nucleolus [GO:0005730]; nucleoplasm [GO:0005654]; ribonucleoprotein complex [GO:1990904]; synapse [GO:0045202]	cytoplasm [GO:0005737]; cytosol [GO:0005829]; cytosolic large ribosomal subunit [GO:0022625]; cytosolic ribosome [GO:0022626]; extracellular exosome [GO:0070062]; membrane [GO:0016020]; nucleolus [GO:0005730]; nucleoplasm [GO:0005654]; ribonucleoprotein complex [GO:1990904]; synapse [GO:0045202]; mRNA 5'-UTR binding [GO:0048027]; RNA binding [GO:0003723]; structural constituent of ribosome [GO:00…	mRNA 5'-UTR binding [GO:0048027]; RNA binding [GO:0003723]; structural constituent of ribosome [GO:0003735]	GO:0002181; GO:0003723; GO:0003735; GO:0005654; GO:0005730; GO:0005737; GO:0005829; GO:0006364; GO:0006412; GO:0006977; GO:0016020; GO:0022625; GO:0022626; GO:0034644; GO:0042273; GO:0045202; GO:0045727; GO:0048027; GO:0070062; GO:0071480; GO:1902164; GO:1902167; GO:1904803; GO:1990904
sp|P18077|RL35A_HUMAN	RL35A_HUMAN	35378000	28304000	3387700	17308000	47085000	59250000	90830000	185200000	13967000	44330000	84977000	51111000	12	55093975	4.88131e+07	P18077	60S ribosomal protein L35a (Cell growth-inhibiting gene 33 protein) (Large ribosomal subunit protein eL33)	cytoplasmic translation [GO:0002181]; ribosomal large subunit biogenesis [GO:0042273]; rRNA processing [GO:0006364]; translation [GO:0006412]	cytoplasm [GO:0005737]; cytosol [GO:0005829]; cytosolic large ribosomal subunit [GO:0022625]; cytosolic ribosome [GO:0022626]; extracellular exosome [GO:0070062]; membrane [GO:0016020]	cytoplasm [GO:0005737]; cytosol [GO:0005829]; cytosolic large ribosomal subunit [GO:0022625]; cytosolic ribosome [GO:0022626]; extracellular exosome [GO:0070062]; membrane [GO:0016020]; RNA binding [GO:0003723]; structural constituent of ribosome [GO:0003735]; tRNA binding [GO:0000049]; cytoplasmic translation [GO:0002181]; ribosomal large subunit biogenesis [GO:0042273]; rRNA processing [GO:0006…	RNA binding [GO:0003723]; structural constituent of ribosome [GO:0003735]; tRNA binding [GO:0000049]	GO:0000049; GO:0002181; GO:0003723; GO:0003735; GO:0005737; GO:0005829; GO:0006364; GO:0006412; GO:0016020; GO:0022625; GO:0022626; GO:0042273; GO:0070062
sp|P62306|RUXF_HUMAN	RUXF_HUMAN	61379000	21475000	3312600	63351000	40298000	98164000	99811000	37750000	1854900	102080000	59301000	44376000	12	5.27627e+07	3.49064e+07	P62306	Small nuclear ribonucleoprotein F (snRNP-F) (Sm protein F) (Sm-F) (SmF)	7-methylguanosine cap hypermethylation [GO:0036261]; mRNA splicing, via spliceosome [GO:0000398]; RNA splicing [GO:0008380]; spliceosomal snRNP assembly [GO:0000387]; U2-type prespliceosome assembly [GO:1903241]	catalytic step 2 spliceosome [GO:0071013]; cytosol [GO:0005829]; methylosome [GO:0034709]; nucleoplasm [GO:0005654]; nucleus [GO:0005634]; pICln-Sm protein complex [GO:0034715]; small nuclear ribonucleoprotein complex [GO:0030532]; SMN-Sm protein complex [GO:0034719]; spliceosomal complex [GO:0005681]; U1 snRNP [GO:0005685]; U12-type spliceosomal complex [GO:0005689]; U2 snRNP [GO:0005686]; U2-ty…	catalytic step 2 spliceosome [GO:0071013]; cytosol [GO:0005829]; methylosome [GO:0034709]; nucleoplasm [GO:0005654]; nucleus [GO:0005634]; pICln-Sm protein complex [GO:0034715]; small nuclear ribonucleoprotein complex [GO:0030532]; SMN-Sm protein complex [GO:0034719]; spliceosomal complex [GO:0005681]; U1 snRNP [GO:0005685]; U12-type spliceosomal complex [GO:0005689]; U2 snRNP [GO:0005686]; U2-ty…	RNA binding [GO:0003723]	GO:0000387; GO:0000398; GO:0003723; GO:0005634; GO:0005654; GO:0005681; GO:0005682; GO:0005683; GO:0005685; GO:0005686; GO:0005687; GO:0005689; GO:0005829; GO:0008380; GO:0030532; GO:0034709; GO:0034715; GO:0034719; GO:0036261; GO:0046540; GO:0071005; GO:0071007; GO:0071013; GO:1903241
sp|P04083|ANXA1_HUMAN	ANXA1_HUMAN	34076000	44651000	8118700	44990000	62756000	67467000	90657000	79167000	10085000	77068000	53278000	54227000	12	52211725	2.58116e+07	P04083	Annexin A1 (Annexin I) (Annexin-1) (Calpactin II) (Calpactin-2) (Chromobindin-9) (Lipocortin I) (Phospholipase A2 inhibitory protein) (p35)	actin cytoskeleton reorganization [GO:0031532]; adaptive immune response [GO:0002250]; alpha-beta T cell differentiation [GO:0046632]; arachidonic acid secretion [GO:0050482]; cell surface receptor signaling pathway [GO:0007166]; cellular response to glucocorticoid stimulus [GO:0071385]; cellular response to hydrogen peroxide [GO:0070301]; cellular response to vascular endothelial growth factor s…	adherens junction [GO:0005912]; apical plasma membrane [GO:0016324]; basolateral plasma membrane [GO:0016323]; cell surface [GO:0009986]; collagen-containing extracellular matrix [GO:0062023]; cornified envelope [GO:0001533]; cytoplasm [GO:0005737]; cytosol [GO:0005829]; early endosome membrane [GO:0031901]; endosome [GO:0005768]; extracellular exosome [GO:0070062]; extracellular region [GO:00055…	adherens junction [GO:0005912]; apical plasma membrane [GO:0016324]; basolateral plasma membrane [GO:0016323]; cell surface [GO:0009986]; collagen-containing extracellular matrix [GO:0062023]; cornified envelope [GO:0001533]; cytoplasm [GO:0005737]; cytosol [GO:0005829]; early endosome membrane [GO:0031901]; endosome [GO:0005768]; extracellular exosome [GO:0070062]; extracellular region [GO:00055…	cadherin binding involved in cell-cell adhesion [GO:0098641]; calcium ion binding [GO:0005509]; calcium-dependent phospholipid binding [GO:0005544]; calcium-dependent protein binding [GO:0048306]; lipid binding [GO:0008289]; phospholipase A2 inhibitor activity [GO:0019834]; phospholipid binding [GO:0005543]; signaling receptor binding [GO:0005102]	GO:0001533; GO:0001780; GO:0001891; GO:0002250; GO:0002548; GO:0002685; GO:0005102; GO:0005509; GO:0005543; GO:0005544; GO:0005576; GO:0005615; GO:0005634; GO:0005654; GO:0005737; GO:0005768; GO:0005829; GO:0005886; GO:0005912; GO:0005925; GO:0006909; GO:0006954; GO:0007165; GO:0007166; GO:0007187; GO:0008289; GO:0008360; GO:0009986; GO:0010165; GO:0014839; GO:0016323; GO:0016324; GO:0016328; GO:…
sp|P15880|RS2_HUMAN	RS2_HUMAN	34061000	21812000	6259700	33332000	73413000	60009000	57088000	142480000	16759000	52653000	85938000	38859000	12	5.18886e+07	3.68975e+07	P15880	40S ribosomal protein S2 (40S ribosomal protein S4) (Protein LLRep3) (Small ribosomal subunit protein uS5)	cytoplasmic translation [GO:0002181]; positive regulation of ubiquitin-protein transferase activity [GO:0051443]; translation [GO:0006412]	cytoplasm [GO:0005737]; cytosol [GO:0005829]; cytosolic ribosome [GO:0022626]; cytosolic small ribosomal subunit [GO:0022627]; extracellular exosome [GO:0070062]; focal adhesion [GO:0005925]; membrane [GO:0016020]; nucleoplasm [GO:0005654]; nucleus [GO:0005634]	cytoplasm [GO:0005737]; cytosol [GO:0005829]; cytosolic ribosome [GO:0022626]; cytosolic small ribosomal subunit [GO:0022627]; extracellular exosome [GO:0070062]; focal adhesion [GO:0005925]; membrane [GO:0016020]; nucleoplasm [GO:0005654]; nucleus [GO:0005634]; cadherin binding [GO:0045296]; enzyme binding [GO:0019899]; fibroblast growth factor binding [GO:0017134]; mRNA binding [GO:0003729]; RN…	cadherin binding [GO:0045296]; enzyme binding [GO:0019899]; fibroblast growth factor binding [GO:0017134]; mRNA binding [GO:0003729]; RNA binding [GO:0003723]; structural constituent of ribosome [GO:0003735]	GO:0002181; GO:0003723; GO:0003729; GO:0003735; GO:0005634; GO:0005654; GO:0005737; GO:0005829; GO:0005925; GO:0006412; GO:0016020; GO:0017134; GO:0019899; GO:0022626; GO:0022627; GO:0045296; GO:0051443; GO:0070062
sp|P42766|RL35_HUMAN	RL35_HUMAN	25208000	18255000	13209000	28910000	102280000	68397000	24829000	183540000	27404000	51300000	48803000	24806000	12	51411750	4.86952e+07	P42766	60S ribosomal protein L35 (Large ribosomal subunit protein uL29)	cytoplasmic translation [GO:0002181]; maturation of LSU-rRNA from tricistronic rRNA transcript (SSU-rRNA, 5.8S rRNA, LSU-rRNA) [GO:0000463]; translation [GO:0006412]	cytoplasm [GO:0005737]; cytosol [GO:0005829]; cytosolic large ribosomal subunit [GO:0022625]; cytosolic ribosome [GO:0022626]; membrane [GO:0016020]; nucleolus [GO:0005730]	cytoplasm [GO:0005737]; cytosol [GO:0005829]; cytosolic large ribosomal subunit [GO:0022625]; cytosolic ribosome [GO:0022626]; membrane [GO:0016020]; nucleolus [GO:0005730]; mRNA binding [GO:0003729]; RNA binding [GO:0003723]; structural constituent of ribosome [GO:0003735]; cytoplasmic translation [GO:0002181]; maturation of LSU-rRNA from tricistronic rRNA transcript (SSU-rRNA, 5.8S rRNA, LSU-rR…	mRNA binding [GO:0003729]; RNA binding [GO:0003723]; structural constituent of ribosome [GO:0003735]	GO:0000463; GO:0002181; GO:0003723; GO:0003729; GO:0003735; GO:0005730; GO:0005737; GO:0005829; GO:0006412; GO:0016020; GO:0022625; GO:0022626
sp|P19338|NUCL_HUMAN	NUCL_HUMAN	56071000	39557000	14875000	17172000	17626000	25645000	100340000	163240000	15210000	34178000	83925000	38244000	12	5.05069e+07	4.49269e+07	P19338	Nucleolin (Protein C23)	angiogenesis [GO:0001525]; cellular response to epidermal growth factor stimulus [GO:0071364]; cellular response to leukemia inhibitory factor [GO:1990830]; negative regulation of insulin receptor signaling pathway [GO:0046627]; negative regulation of translation [GO:0017148]; positive regulation of mRNA splicing, via spliceosome [GO:0048026]; positive regulation of transcription by RNA polymeras…	cell cortex [GO:0005938]; chromosome [GO:0005694]; cornified envelope [GO:0001533]; cytoplasmic ribonucleoprotein granule [GO:0036464]; extracellular exosome [GO:0070062]; membrane [GO:0016020]; nucleolus [GO:0005730]; nucleoplasm [GO:0005654]; nucleus [GO:0005634]; ribonucleoprotein complex [GO:1990904]; spliceosomal complex [GO:0005681]	cell cortex [GO:0005938]; chromosome [GO:0005694]; cornified envelope [GO:0001533]; cytoplasmic ribonucleoprotein granule [GO:0036464]; extracellular exosome [GO:0070062]; membrane [GO:0016020]; nucleolus [GO:0005730]; nucleoplasm [GO:0005654]; nucleus [GO:0005634]; ribonucleoprotein complex [GO:1990904]; spliceosomal complex [GO:0005681]; DNA topoisomerase binding [GO:0044547]; identical protein…	DNA topoisomerase binding [GO:0044547]; identical protein binding [GO:0042802]; insulin receptor substrate binding [GO:0043560]; mRNA 5'-UTR binding [GO:0048027]; PH domain binding [GO:0042731]; RNA binding [GO:0003723]; telomeric DNA binding [GO:0042162]	GO:0001525; GO:0001533; GO:0003723; GO:0005634; GO:0005654; GO:0005681; GO:0005694; GO:0005730; GO:0005938; GO:0016020; GO:0017148; GO:0036464; GO:0042162; GO:0042731; GO:0042802; GO:0043560; GO:0044547; GO:0045944; GO:0046627; GO:0048026; GO:0048027; GO:0050730; GO:0070062; GO:0071364; GO:1901838; GO:1990830; GO:1990904
sp|O75531|BAF_HUMAN	BAF_HUMAN	14766000	56267000	71454000	23912000	13770000	8240200	25390000	107550000	212860000	5532500	39256000	18297000	12	4.97746e+07	5.95562e+07	O75531	Barrier-to-autointegration factor (Breakpoint cluster region protein 1) [Cleaved into: Barrier-to-autointegration factor, N-terminally processed]	chromatin organization [GO:0006325]; DNA integration [GO:0015074]; mitotic nuclear membrane reassembly [GO:0007084]; negative regulation of innate immune response [GO:0045824]; negative regulation of protein ADP-ribosylation [GO:0010836]; negative regulation of type I interferon production [GO:0032480]; negative regulation of viral genome replication [GO:0045071]; response to oxidative stress [GO…	chromatin [GO:0000785]; condensed chromosome [GO:0000793]; cytoplasm [GO:0005737]; cytosol [GO:0005829]; nuclear envelope [GO:0005635]; nucleoplasm [GO:0005654]; nucleus [GO:0005634]	chromatin [GO:0000785]; condensed chromosome [GO:0000793]; cytoplasm [GO:0005737]; cytosol [GO:0005829]; nuclear envelope [GO:0005635]; nucleoplasm [GO:0005654]; nucleus [GO:0005634]; double-stranded DNA binding [GO:0003690]; identical protein binding [GO:0042802]; molecular function inhibitor activity [GO:0140678]; protein homodimerization activity [GO:0042803]; chromatin organization [GO:000632…	double-stranded DNA binding [GO:0003690]; identical protein binding [GO:0042802]; molecular function inhibitor activity [GO:0140678]; protein homodimerization activity [GO:0042803]	GO:0000785; GO:0000793; GO:0003690; GO:0005634; GO:0005635; GO:0005654; GO:0005737; GO:0005829; GO:0006325; GO:0006979; GO:0007084; GO:0009615; GO:0010836; GO:0015074; GO:0032480; GO:0042802; GO:0042803; GO:0045071; GO:0045824; GO:0140678
sp|O00299|CLIC1_HUMAN	CLIC1_HUMAN	41641000	44331000	2090200	55503000	33538000	62958000	79345000	78062000	3590400	92014000	44363000	57847000	12	4.96069e+07	2.78399e+07	O00299	Chloride intracellular channel protein 1 (Chloride channel ABP) (Nuclear chloride ion channel 27) (NCC27) (Regulatory nuclear chloride ion channel protein) (hRNCC)	chloride transport [GO:0006821]; platelet aggregation [GO:0070527]; positive regulation of osteoblast differentiation [GO:0045669]; regulation of mitochondrial membrane potential [GO:0051881]; regulation of monoatomic ion transmembrane transport [GO:0034765]; signal transduction [GO:0007165]	blood microparticle [GO:0072562]; brush border [GO:0005903]; chloride channel complex [GO:0034707]; cytoplasm [GO:0005737]; extracellular exosome [GO:0070062]; extracellular space [GO:0005615]; membrane [GO:0016020]; mitochondrion [GO:0005739]; nuclear envelope [GO:0005635]; nuclear membrane [GO:0031965]; nucleus [GO:0005634]; perinuclear region of cytoplasm [GO:0048471]; plasma membrane [GO:0005…	blood microparticle [GO:0072562]; brush border [GO:0005903]; chloride channel complex [GO:0034707]; cytoplasm [GO:0005737]; extracellular exosome [GO:0070062]; extracellular space [GO:0005615]; membrane [GO:0016020]; mitochondrion [GO:0005739]; nuclear envelope [GO:0005635]; nuclear membrane [GO:0031965]; nucleus [GO:0005634]; perinuclear region of cytoplasm [GO:0048471]; plasma membrane [GO:0005…	cadherin binding [GO:0045296]; chloride channel activity [GO:0005254]; voltage-gated monoatomic ion channel activity [GO:0005244]	GO:0005244; GO:0005254; GO:0005615; GO:0005634; GO:0005635; GO:0005737; GO:0005739; GO:0005886; GO:0005903; GO:0006821; GO:0007165; GO:0016020; GO:0031965; GO:0031982; GO:0034707; GO:0034765; GO:0045296; GO:0045669; GO:0048471; GO:0051881; GO:0070062; GO:0070527; GO:0072562
sp|P08670|VIME_HUMAN	VIME_HUMAN	44635000	37260000	41016000	66502000	17543000	45073000	40427000	44460000	25785000	115420000	83867000	24838000	12	4.89022e+07	2.75944e+07	P08670	Vimentin	astrocyte development [GO:0014002]; Bergmann glial cell differentiation [GO:0060020]; cellular response to lipopolysaccharide [GO:0071222]; cellular response to muramyl dipeptide [GO:0071225]; cellular response to type II interferon [GO:0071346]; intermediate filament organization [GO:0045109]; lens fiber cell development [GO:0070307]; negative regulation of neuron projection development [GO:0010…	axon [GO:0030424]; cell leading edge [GO:0031252]; cytoplasm [GO:0005737]; cytoskeleton [GO:0005856]; cytosol [GO:0005829]; extracellular exosome [GO:0070062]; focal adhesion [GO:0005925]; intermediate filament [GO:0005882]; intermediate filament cytoskeleton [GO:0045111]; microtubule organizing center [GO:0005815]; nuclear matrix [GO:0016363]; peroxisome [GO:0005777]; phagocytic vesicle [GO:0045…	axon [GO:0030424]; cell leading edge [GO:0031252]; cytoplasm [GO:0005737]; cytoskeleton [GO:0005856]; cytosol [GO:0005829]; extracellular exosome [GO:0070062]; focal adhesion [GO:0005925]; intermediate filament [GO:0005882]; intermediate filament cytoskeleton [GO:0045111]; microtubule organizing center [GO:0005815]; nuclear matrix [GO:0016363]; peroxisome [GO:0005777]; phagocytic vesicle [GO:0045…	double-stranded RNA binding [GO:0003725]; identical protein binding [GO:0042802]; keratin filament binding [GO:1990254]; molecular adaptor activity [GO:0060090]; protein domain specific binding [GO:0019904]; scaffold protein binding [GO:0097110]; structural constituent of cytoskeleton [GO:0005200]; structural constituent of eye lens [GO:0005212]	GO:0003725; GO:0005200; GO:0005212; GO:0005737; GO:0005777; GO:0005815; GO:0005829; GO:0005844; GO:0005856; GO:0005882; GO:0005886; GO:0005925; GO:0010977; GO:0014002; GO:0016363; GO:0019904; GO:0030424; GO:0031175; GO:0031252; GO:0032967; GO:0042802; GO:0043488; GO:0045109; GO:0045111; GO:0045335; GO:0045727; GO:0060020; GO:0060090; GO:0060395; GO:0070062; GO:0070307; GO:0071222; GO:0071225; GO:…
sp|P27635|RL10_HUMAN	RL10_HUMAN	50710000	54658000	3109500	29537000	39757000	60103000	55983000	59685000	8489300	45935000	92133000	65629000	12	4.71441e+07	2.45644e+07	P27635	60S ribosomal protein L10 (Laminin receptor homolog) (Large ribosomal subunit protein uL16) (Protein QM) (Ribosomal protein L10) (Tumor suppressor QM)	cytoplasmic translation [GO:0002181]; embryonic brain development [GO:1990403]; negative regulation of apoptotic process [GO:0043066]; negative regulation of transcription by RNA polymerase II [GO:0000122]; regulation of translation [GO:0006417]; ribosomal large subunit assembly [GO:0000027]; translation [GO:0006412]	cytosol [GO:0005829]; cytosolic large ribosomal subunit [GO:0022625]; cytosolic ribosome [GO:0022626]; endoplasmic reticulum [GO:0005783]; membrane [GO:0016020]; nucleus [GO:0005634]; protein-containing complex [GO:0032991]	cytosol [GO:0005829]; cytosolic large ribosomal subunit [GO:0022625]; cytosolic ribosome [GO:0022626]; endoplasmic reticulum [GO:0005783]; membrane [GO:0016020]; nucleus [GO:0005634]; protein-containing complex [GO:0032991]; RNA binding [GO:0003723]; structural constituent of ribosome [GO:0003735]; translation regulator activity [GO:0045182]; cytoplasmic translation [GO:0002181]; embryonic brain …	RNA binding [GO:0003723]; structural constituent of ribosome [GO:0003735]; translation regulator activity [GO:0045182]	GO:0000027; GO:0000122; GO:0002181; GO:0003723; GO:0003735; GO:0005634; GO:0005783; GO:0005829; GO:0006412; GO:0006417; GO:0016020; GO:0022625; GO:0022626; GO:0032991; GO:0043066; GO:0045182; GO:1990403
sp|P18621|RL17_HUMAN	RL17_HUMAN	19576000	31206000	7687600	46017000	41378000	44097000	80339000	129490000	13736000	36595000	72682000	39654000	12	4.68715e+07	3.36184e+07	P18621	60S ribosomal protein L17 (60S ribosomal protein L23) (Large ribosomal subunit protein uL22) (PD-1)	cytoplasmic translation [GO:0002181]; translation [GO:0006412]	cytoplasm [GO:0005737]; cytosol [GO:0005829]; cytosolic large ribosomal subunit [GO:0022625]; cytosolic ribosome [GO:0022626]; nucleus [GO:0005634]	cytoplasm [GO:0005737]; cytosol [GO:0005829]; cytosolic large ribosomal subunit [GO:0022625]; cytosolic ribosome [GO:0022626]; nucleus [GO:0005634]; RNA binding [GO:0003723]; structural constituent of ribosome [GO:0003735]; cytoplasmic translation [GO:0002181]; translation [GO:0006412]	RNA binding [GO:0003723]; structural constituent of ribosome [GO:0003735]	GO:0002181; GO:0003723; GO:0003735; GO:0005634; GO:0005737; GO:0005829; GO:0006412; GO:0022625; GO:0022626
sp|P62910|RL32_HUMAN	RL32_HUMAN	32340000	24366000	4309500	20970000	52580000	50446000	89268000	134650000	10414000	34961000	61765000	43873000	12	46661875	3.62432e+07	P62910	60S ribosomal protein L32 (Large ribosomal subunit protein eL32)	cytoplasmic translation [GO:0002181]; translation [GO:0006412]	cytoplasm [GO:0005737]; cytosol [GO:0005829]; cytosolic large ribosomal subunit [GO:0022625]; cytosolic ribosome [GO:0022626]; membrane [GO:0016020]; polysomal ribosome [GO:0042788]; synapse [GO:0045202]	cytoplasm [GO:0005737]; cytosol [GO:0005829]; cytosolic large ribosomal subunit [GO:0022625]; cytosolic ribosome [GO:0022626]; membrane [GO:0016020]; polysomal ribosome [GO:0042788]; synapse [GO:0045202]; RNA binding [GO:0003723]; structural constituent of ribosome [GO:0003735]; cytoplasmic translation [GO:0002181]; translation [GO:0006412]	RNA binding [GO:0003723]; structural constituent of ribosome [GO:0003735]	GO:0002181; GO:0003723; GO:0003735; GO:0005737; GO:0005829; GO:0006412; GO:0016020; GO:0022625; GO:0022626; GO:0042788; GO:0045202
sp|P09651|ROA1_HUMAN	ROA1_HUMAN	48994000	51085000	57198000	41511000	15036000	33778000	30075000	72095000	71080000	49227000	65200000	24152000	12	46619250	1.83498e+07	P09651	Heterogeneous nuclear ribonucleoprotein A1 (hnRNP A1) (Helix-destabilizing protein) (Single-strand RNA-binding protein) (hnRNP core protein A1) [Cleaved into: Heterogeneous nuclear ribonucleoprotein A1, N-terminally processed]	amyloid fibril formation [GO:1990000]; cellular response to glucose starvation [GO:0042149]; cellular response to sodium arsenite [GO:1903936]; import into nucleus [GO:0051170]; localization [GO:0051179]; mRNA splicing, via spliceosome [GO:0000398]; mRNA transport [GO:0051028]; negative regulation of telomere maintenance via telomerase [GO:0032211]; nuclear export [GO:0051168]; positive regulatio…	catalytic step 2 spliceosome [GO:0071013]; cytoplasm [GO:0005737]; cytosol [GO:0005829]; extracellular exosome [GO:0070062]; intracellular non-membrane-bounded organelle [GO:0043232]; membrane [GO:0016020]; nucleoplasm [GO:0005654]; nucleus [GO:0005634]; ribonucleoprotein complex [GO:1990904]; spliceosomal complex [GO:0005681]	catalytic step 2 spliceosome [GO:0071013]; cytoplasm [GO:0005737]; cytosol [GO:0005829]; extracellular exosome [GO:0070062]; intracellular non-membrane-bounded organelle [GO:0043232]; membrane [GO:0016020]; nucleoplasm [GO:0005654]; nucleus [GO:0005634]; ribonucleoprotein complex [GO:1990904]; spliceosomal complex [GO:0005681]; DNA binding [GO:0003677]; G-rich strand telomeric DNA binding [GO:009…	DNA binding [GO:0003677]; G-rich strand telomeric DNA binding [GO:0098505]; identical protein binding [GO:0042802]; miRNA binding [GO:0035198]; molecular condensate scaffold activity [GO:0140693]; pre-mRNA binding [GO:0036002]; protein domain specific binding [GO:0019904]; RNA binding [GO:0003723]; single-stranded DNA binding [GO:0003697]; single-stranded RNA binding [GO:0003727]; telomeric repea…	GO:0000381; GO:0000398; GO:0003677; GO:0003697; GO:0003723; GO:0003727; GO:0005634; GO:0005654; GO:0005681; GO:0005737; GO:0005829; GO:0006405; GO:0016020; GO:0019904; GO:0032211; GO:0032212; GO:0035198; GO:0036002; GO:0042149; GO:0042802; GO:0043232; GO:0043484; GO:0051028; GO:0051168; GO:0051170; GO:0051179; GO:0061752; GO:0070062; GO:0071013; GO:0098505; GO:0140693; GO:1903936; GO:1990000; GO:…
sp|P62244|RS15A_HUMAN	RS15A_HUMAN	30653000	20928000	2183900	41245000	59609000	86453000	85198000	56469000	5744000	60244000	69927000	23990000	12	45220325	2.88372e+07	P62244	40S ribosomal protein S15a (Small ribosomal subunit protein uS8)	cytoplasmic translation [GO:0002181]; positive regulation of cell cycle [GO:0045787]; positive regulation of cell population proliferation [GO:0008284]; response to virus [GO:0009615]; ribosomal small subunit biogenesis [GO:0042274]; translation [GO:0006412]	cytoplasm [GO:0005737]; cytosol [GO:0005829]; cytosolic ribosome [GO:0022626]; cytosolic small ribosomal subunit [GO:0022627]; extracellular exosome [GO:0070062]; membrane [GO:0016020]; nucleolus [GO:0005730]; nucleoplasm [GO:0005654]; small-subunit processome [GO:0032040]; synapse [GO:0045202]	cytoplasm [GO:0005737]; cytosol [GO:0005829]; cytosolic ribosome [GO:0022626]; cytosolic small ribosomal subunit [GO:0022627]; extracellular exosome [GO:0070062]; membrane [GO:0016020]; nucleolus [GO:0005730]; nucleoplasm [GO:0005654]; small-subunit processome [GO:0032040]; synapse [GO:0045202]; RNA binding [GO:0003723]; structural constituent of ribosome [GO:0003735]; cytoplasmic translation [GO…	RNA binding [GO:0003723]; structural constituent of ribosome [GO:0003735]	GO:0002181; GO:0003723; GO:0003735; GO:0005654; GO:0005730; GO:0005737; GO:0005829; GO:0006412; GO:0008284; GO:0009615; GO:0016020; GO:0022626; GO:0022627; GO:0032040; GO:0042274; GO:0045202; GO:0045787; GO:0070062
sp|P11586|C1TC_HUMAN	C1TC_HUMAN	66801000	64900000	374340	26451000	19779000	32533000	51274000	40856000	683680	57895000	98581000	77254000	12	44781835	3.02952e+07	P11586	C-1-tetrahydrofolate synthase, cytoplasmic (C1-THF synthase) (Epididymis secretory sperm binding protein) [Cleaved into: C-1-tetrahydrofolate synthase, cytoplasmic, N-terminally processed] [Includes: Methylenetetrahydrofolate dehydrogenase (EC 1.5.1.5); Methenyltetrahydrofolate cyclohydrolase (EC 3.5.4.9); Formyltetrahydrofolate synthetase (EC 6.3.4.3)]	10-formyltetrahydrofolate biosynthetic process [GO:0009257]; embryonic neurocranium morphogenesis [GO:0048702]; embryonic viscerocranium morphogenesis [GO:0048703]; heart development [GO:0007507]; histidine biosynthetic process [GO:0000105]; methionine biosynthetic process [GO:0009086]; methionine metabolic process [GO:0006555]; neural tube closure [GO:0001843]; neutrophil homeostasis [GO:0001780…	cytosol [GO:0005829]; extracellular exosome [GO:0070062]; membrane [GO:0016020]; mitochondrion [GO:0005739]	cytosol [GO:0005829]; extracellular exosome [GO:0070062]; membrane [GO:0016020]; mitochondrion [GO:0005739]; ATP binding [GO:0005524]; formate-tetrahydrofolate ligase activity [GO:0004329]; methenyltetrahydrofolate cyclohydrolase activity [GO:0004477]; methylenetetrahydrofolate dehydrogenase (NAD+) activity [GO:0004487]; methylenetetrahydrofolate dehydrogenase (NADP+) activity [GO:0004488]; methy…	ATP binding [GO:0005524]; formate-tetrahydrofolate ligase activity [GO:0004329]; methenyltetrahydrofolate cyclohydrolase activity [GO:0004477]; methylenetetrahydrofolate dehydrogenase (NAD+) activity [GO:0004487]; methylenetetrahydrofolate dehydrogenase (NADP+) activity [GO:0004488]; methylenetetrahydrofolate dehydrogenase [NAD(P)+] activity [GO:0004486]	GO:0000105; GO:0001780; GO:0001843; GO:0004329; GO:0004477; GO:0004486; GO:0004487; GO:0004488; GO:0005524; GO:0005739; GO:0005829; GO:0006164; GO:0006555; GO:0006730; GO:0007507; GO:0009069; GO:0009070; GO:0009086; GO:0009152; GO:0009257; GO:0016020; GO:0019346; GO:0035999; GO:0048702; GO:0048703; GO:0061053; GO:0070062
sp|P21926|CD9_HUMAN	CD9_HUMAN	49482000	39966000	6208400	35122000	34426000	49618000	86464000	76200000	2145200	45251000	69714000	38701000	12	4.44415e+07	2.51485e+07	P21926	CD9 antigen (5H9 antigen) (Cell growth-inhibiting gene 2 protein) (Leukocyte antigen MIC3) (Motility-related protein) (MRP-1) (Tetraspanin-29) (Tspan-29) (p24) (CD antigen CD9)	cell adhesion [GO:0007155]; cell population proliferation [GO:0008283]; cellular response to low-density lipoprotein particle stimulus [GO:0071404]; fusion of sperm to egg plasma membrane involved in single fertilization [GO:0007342]; glial cell migration [GO:0008347]; myoblast fusion involved in skeletal muscle regeneration [GO:0014905]; negative regulation of cell population proliferation [GO:0…	clathrin-coated endocytic vesicle membrane [GO:0030669]; endocytic vesicle membrane [GO:0030666]; external side of plasma membrane [GO:0009897]; extracellular exosome [GO:0070062]; extracellular space [GO:0005615]; extracellular vesicle [GO:1903561]; focal adhesion [GO:0005925]; membrane [GO:0016020]; plasma membrane [GO:0005886]; platelet alpha granule membrane [GO:0031092]; protein-containing c…	clathrin-coated endocytic vesicle membrane [GO:0030669]; endocytic vesicle membrane [GO:0030666]; external side of plasma membrane [GO:0009897]; extracellular exosome [GO:0070062]; extracellular space [GO:0005615]; extracellular vesicle [GO:1903561]; focal adhesion [GO:0005925]; membrane [GO:0016020]; plasma membrane [GO:0005886]; platelet alpha granule membrane [GO:0031092]; protein-containing c…	integrin binding [GO:0005178]	GO:0005178; GO:0005615; GO:0005886; GO:0005925; GO:0007155; GO:0007342; GO:0008283; GO:0008285; GO:0008347; GO:0009897; GO:0014905; GO:0016020; GO:0030168; GO:0030666; GO:0030669; GO:0030913; GO:0031092; GO:0031623; GO:0032991; GO:0035036; GO:0070062; GO:0071404; GO:0090331; GO:1903561; GO:1905521
sp|P26038|MOES_HUMAN	MOES_HUMAN	46136000	31999000	676300	32140000	31911000	51856000	77180000	93204000	1496600	70414000	57251000	37469000	12	44311075	2.79891e+07	P26038	Moesin (Membrane-organizing extension spike protein)	cellular response to testosterone stimulus [GO:0071394]; establishment of endothelial barrier [GO:0061028]; establishment of epithelial cell apical/basal polarity [GO:0045198]; gland morphogenesis [GO:0022612]; immunological synapse formation [GO:0001771]; leukocyte cell-cell adhesion [GO:0007159]; leukocyte migration [GO:0050900]; membrane to membrane docking [GO:0022614]; positive regulation of…	adherens junction [GO:0005912]; apical part of cell [GO:0045177]; apical plasma membrane [GO:0016324]; basolateral plasma membrane [GO:0016323]; blood microparticle [GO:0072562]; cell periphery [GO:0071944]; cell surface [GO:0009986]; cytoplasm [GO:0005737]; cytoskeleton [GO:0005856]; cytosol [GO:0005829]; extracellular exosome [GO:0070062]; extracellular space [GO:0005615]; filopodium [GO:003017…	adherens junction [GO:0005912]; apical part of cell [GO:0045177]; apical plasma membrane [GO:0016324]; basolateral plasma membrane [GO:0016323]; blood microparticle [GO:0072562]; cell periphery [GO:0071944]; cell surface [GO:0009986]; cytoplasm [GO:0005737]; cytoskeleton [GO:0005856]; cytosol [GO:0005829]; extracellular exosome [GO:0070062]; extracellular space [GO:0005615]; filopodium [GO:003017…	actin binding [GO:0003779]; cell adhesion molecule binding [GO:0050839]; double-stranded RNA binding [GO:0003725]; enzyme binding [GO:0019899]; protein kinase binding [GO:0019901]; signaling receptor binding [GO:0005102]; structural constituent of cytoskeleton [GO:0005200]	GO:0001771; GO:0001931; GO:0003725; GO:0003779; GO:0005102; GO:0005200; GO:0005615; GO:0005634; GO:0005737; GO:0005829; GO:0005856; GO:0005886; GO:0005902; GO:0005912; GO:0005925; GO:0007159; GO:0008360; GO:0008361; GO:0009986; GO:0010628; GO:0016323; GO:0016324; GO:0019899; GO:0019901; GO:0022612; GO:0022614; GO:0030175; GO:0031143; GO:0031528; GO:0031982; GO:0042098; GO:0045177; GO:0045198; GO:…
sp|P63241|IF5A1_HUMAN	IF5A1_HUMAN	64941000	58377000	12203000	47378000	23023000	46563000	43622000	57458000	15574000	49867000	65335000	37288000	12	4.34691e+07	1.81781e+07	P63241	Eukaryotic translation initiation factor 5A-1 (eIF-5A-1) (eIF-5A1) (Eukaryotic initiation factor 5A isoform 1) (eIF-5A) (Rev-binding factor) (eIF-4D)	cellular response to virus [GO:0098586]; positive regulation of intrinsic apoptotic signaling pathway by p53 class mediator [GO:1902255]; positive regulation of transcription by RNA polymerase II [GO:0045944]; positive regulation of translational elongation [GO:0045901]; positive regulation of translational termination [GO:0045905]; translational elongation [GO:0006414]; tumor necrosis factor-med…	annulate lamellae [GO:0005642]; cytoplasm [GO:0005737]; cytosol [GO:0005829]; endoplasmic reticulum membrane [GO:0005789]; membrane [GO:0016020]; nuclear pore [GO:0005643]; nucleus [GO:0005634]	annulate lamellae [GO:0005642]; cytoplasm [GO:0005737]; cytosol [GO:0005829]; endoplasmic reticulum membrane [GO:0005789]; membrane [GO:0016020]; nuclear pore [GO:0005643]; nucleus [GO:0005634]; ribosome binding [GO:0043022]; RNA binding [GO:0003723]; translation elongation factor activity [GO:0003746]; U6 snRNA binding [GO:0017070]; cellular response to virus [GO:0098586]; positive regulation of…	ribosome binding [GO:0043022]; RNA binding [GO:0003723]; translation elongation factor activity [GO:0003746]; U6 snRNA binding [GO:0017070]	GO:0003723; GO:0003746; GO:0005634; GO:0005642; GO:0005643; GO:0005737; GO:0005789; GO:0005829; GO:0006414; GO:0016020; GO:0017070; GO:0033209; GO:0043022; GO:0045901; GO:0045905; GO:0045944; GO:0098586; GO:1902255
sp|P60660|MYL6_HUMAN	MYL6_HUMAN	78448000	69818000	17858000	53708000	25597000	46435000	17667000	30506000	16720000	79992000	52734000	27785000	12	4.31057e+07	2.37797e+07	P60660	Myosin light polypeptide 6 (17 kDa myosin light chain) (LC17) (Myosin light chain 3) (MLC-3) (Myosin light chain alkali 3) (Myosin light chain A3) (Smooth muscle and nonmuscle myosin light chain alkali 6)	muscle contraction [GO:0006936]; muscle filament sliding [GO:0030049]; skeletal muscle tissue development [GO:0007519]	brush border [GO:0005903]; cytosol [GO:0005829]; extracellular exosome [GO:0070062]; membrane [GO:0016020]; myosin complex [GO:0016459]; myosin II complex [GO:0016460]; unconventional myosin complex [GO:0016461]; vesicle [GO:0031982]	brush border [GO:0005903]; cytosol [GO:0005829]; extracellular exosome [GO:0070062]; membrane [GO:0016020]; myosin complex [GO:0016459]; myosin II complex [GO:0016460]; unconventional myosin complex [GO:0016461]; vesicle [GO:0031982]; calcium ion binding [GO:0005509]; cytoskeletal motor activity [GO:0003774]; microfilament motor activity [GO:0000146]; structural constituent of muscle [GO:0008307]…	calcium ion binding [GO:0005509]; cytoskeletal motor activity [GO:0003774]; microfilament motor activity [GO:0000146]; structural constituent of muscle [GO:0008307]	GO:0000146; GO:0003774; GO:0005509; GO:0005829; GO:0005903; GO:0006936; GO:0007519; GO:0008307; GO:0016020; GO:0016459; GO:0016460; GO:0016461; GO:0030049; GO:0031982; GO:0070062
sp|P67809|YBOX1_HUMAN	YBOX1_HUMAN	25561000	29483000	27656000	15376000	34678000	36565000	67708000	145000000	29511000	32809000	44447000	26459000	12	42937750	3.46042e+07	P67809	Y-box-binding protein 1 (YB-1) (CCAAT-binding transcription factor I subunit A) (CBF-A) (DNA-binding protein B) (DBPB) (Enhancer factor I subunit A) (EFI-A) (Nuclease-sensitive element-binding protein 1) (Y-box transcription factor)	cellular response to interleukin-7 [GO:0098761]; CRD-mediated mRNA stabilization [GO:0070934]; embryonic morphogenesis [GO:0048598]; epidermis development [GO:0008544]; in utero embryonic development [GO:0001701]; miRNA transport [GO:1990428]; mRNA processing [GO:0006397]; mRNA stabilization [GO:0048255]; negative regulation of cellular senescence [GO:2000773]; negative regulation of nuclear-tran…	CRD-mediated mRNA stability complex [GO:0070937]; cytoplasm [GO:0005737]; cytoplasmic stress granule [GO:0010494]; cytosol [GO:0005829]; endoplasmic reticulum [GO:0005783]; extracellular exosome [GO:0070062]; extracellular region [GO:0005576]; histone pre-mRNA 3'end processing complex [GO:0071204]; intracellular membrane-bounded organelle [GO:0043231]; messenger ribonucleoprotein complex [GO:1990…	CRD-mediated mRNA stability complex [GO:0070937]; cytoplasm [GO:0005737]; cytoplasmic stress granule [GO:0010494]; cytosol [GO:0005829]; endoplasmic reticulum [GO:0005783]; extracellular exosome [GO:0070062]; extracellular region [GO:0005576]; histone pre-mRNA 3'end processing complex [GO:0071204]; intracellular membrane-bounded organelle [GO:0043231]; messenger ribonucleoprotein complex [GO:1990…	C5-methylcytidine-containing RNA binding [GO:0062153]; chromatin binding [GO:0003682]; DNA binding [GO:0003677]; double-stranded DNA binding [GO:0003690]; GTPase binding [GO:0051020]; miRNA binding [GO:0035198]; mRNA binding [GO:0003729]; nucleic acid binding [GO:0003676]; RNA binding [GO:0003723]; sequence-specific double-stranded DNA binding [GO:1990837]; single-stranded DNA binding [GO:0003697]	GO:0000122; GO:0001701; GO:0003676; GO:0003677; GO:0003682; GO:0003690; GO:0003697; GO:0003723; GO:0003729; GO:0005576; GO:0005634; GO:0005654; GO:0005689; GO:0005737; GO:0005783; GO:0005829; GO:0005886; GO:0006355; GO:0006397; GO:0008380; GO:0008544; GO:0010468; GO:0010494; GO:0017148; GO:0035198; GO:0043231; GO:0045202; GO:0045944; GO:0048255; GO:0048598; GO:0050658; GO:0051020; GO:0051031; GO:…
sp|P50914|RL14_HUMAN	RL14_HUMAN	33005000	28058000	3169100	23892000	48548000	47256000	75493000	113290000	15741000	31714000	52162000	35831000	12	4.23466e+07	2.91092e+07	P50914	60S ribosomal protein L14 (CAG-ISL 7) (Large ribosomal subunit protein eL14)	cytoplasmic translation [GO:0002181]; ribosomal large subunit biogenesis [GO:0042273]; rRNA processing [GO:0006364]; translation [GO:0006412]	cytoplasm [GO:0005737]; cytosol [GO:0005829]; cytosolic large ribosomal subunit [GO:0022625]; cytosolic ribosome [GO:0022626]; extracellular exosome [GO:0070062]; membrane [GO:0016020]; postsynaptic density [GO:0014069]	cytoplasm [GO:0005737]; cytosol [GO:0005829]; cytosolic large ribosomal subunit [GO:0022625]; cytosolic ribosome [GO:0022626]; extracellular exosome [GO:0070062]; membrane [GO:0016020]; postsynaptic density [GO:0014069]; cadherin binding [GO:0045296]; RNA binding [GO:0003723]; structural constituent of ribosome [GO:0003735]; cytoplasmic translation [GO:0002181]; ribosomal large subunit biogenesis…	cadherin binding [GO:0045296]; RNA binding [GO:0003723]; structural constituent of ribosome [GO:0003735]	GO:0002181; GO:0003723; GO:0003735; GO:0005737; GO:0005829; GO:0006364; GO:0006412; GO:0014069; GO:0016020; GO:0022625; GO:0022626; GO:0042273; GO:0045296; GO:0070062
sp|Q9UBI6|GBG12_HUMAN	GBG12_HUMAN	11964000	22423000	1578700	33624000	26790000	70282000	76594000	147780000	3745900	69507000	27205000	12077000	12	4.19642e+07	4.23633e+07	Q9UBI6	Guanine nucleotide-binding protein G(I)/G(S)/G(O) subunit gamma-12	G protein-coupled receptor signaling pathway [GO:0007186]; signal transduction [GO:0007165]	extracellular exosome [GO:0070062]; heterotrimeric G-protein complex [GO:0005834]; plasma membrane [GO:0005886]	extracellular exosome [GO:0070062]; heterotrimeric G-protein complex [GO:0005834]; plasma membrane [GO:0005886]; G-protein beta-subunit binding [GO:0031681]; PDZ domain binding [GO:0030165]; G protein-coupled receptor signaling pathway [GO:0007186]; signal transduction [GO:0007165]	G-protein beta-subunit binding [GO:0031681]; PDZ domain binding [GO:0030165]	GO:0005834; GO:0005886; GO:0007165; GO:0007186; GO:0030165; GO:0031681; GO:0070062
sp|P0DMV9|HS71B_HUMAN	HS71B_HUMAN	33547000	30454000	4213800	40468000	26492000	47465000	54687000	52141000	7318300	72897000	66073000	65612000	12	41780675	2.22853e+07	P0DMV9	Heat shock 70 kDa protein 1B (Heat shock 70 kDa protein 2) (HSP70-2) (HSP70.2)	ATP metabolic process [GO:0046034]; cellular heat acclimation [GO:0070370]; cellular response to heat [GO:0034605]; cellular response to oxidative stress [GO:0034599]; cellular response to steroid hormone stimulus [GO:0071383]; chaperone cofactor-dependent protein refolding [GO:0051085]; mRNA catabolic process [GO:0006402]; negative regulation of apoptotic process [GO:0043066]; negative regulatio…	aggresome [GO:0016235]; blood microparticle [GO:0072562]; centriole [GO:0005814]; centrosome [GO:0005813]; cytoplasm [GO:0005737]; cytosol [GO:0005829]; endoplasmic reticulum [GO:0005783]; extracellular exosome [GO:0070062]; extracellular region [GO:0005576]; ficolin-1-rich granule lumen [GO:1904813]; focal adhesion [GO:0005925]; inclusion body [GO:0016234]; mitochondrion [GO:0005739]; nuclear sp…	aggresome [GO:0016235]; blood microparticle [GO:0072562]; centriole [GO:0005814]; centrosome [GO:0005813]; cytoplasm [GO:0005737]; cytosol [GO:0005829]; endoplasmic reticulum [GO:0005783]; extracellular exosome [GO:0070062]; extracellular region [GO:0005576]; ficolin-1-rich granule lumen [GO:1904813]; focal adhesion [GO:0005925]; inclusion body [GO:0016234]; mitochondrion [GO:0005739]; nuclear sp…	ATP binding [GO:0005524]; ATP hydrolysis activity [GO:0016887]; ATP-dependent protein disaggregase activity [GO:0140545]; ATP-dependent protein folding chaperone [GO:0140662]; C3HC4-type RING finger domain binding [GO:0055131]; enzyme binding [GO:0019899]; G protein-coupled receptor binding [GO:0001664]; heat shock protein binding [GO:0031072]; histone deacetylase binding [GO:0042826]; protein fo…	GO:0001618; GO:0001664; GO:0003723; GO:0005102; GO:0005524; GO:0005576; GO:0005634; GO:0005654; GO:0005737; GO:0005739; GO:0005783; GO:0005813; GO:0005814; GO:0005829; GO:0005925; GO:0006402; GO:0008285; GO:0010628; GO:0016234; GO:0016235; GO:0016607; GO:0016887; GO:0019899; GO:0030308; GO:0031072; GO:0031396; GO:0031397; GO:0031625; GO:0031982; GO:0032436; GO:0032757; GO:0032991; GO:0034599; GO:…
sp|P61513|RL37A_HUMAN	RL37A_HUMAN	20366000	19032000	3797400	18602000	43853000	34499000	65851000	193470000	14165000	22927000	38868000	23339000	12	4.15641e+07	5.05142e+07	P61513	60S ribosomal protein L37a (Large ribosomal subunit protein eL43)	cytoplasmic translation [GO:0002181]; translation [GO:0006412]	cytoplasm [GO:0005737]; cytosol [GO:0005829]; cytosolic large ribosomal subunit [GO:0022625]; cytosolic ribosome [GO:0022626]; extracellular exosome [GO:0070062]; focal adhesion [GO:0005925]; nucleus [GO:0005634]; synapse [GO:0045202]	cytoplasm [GO:0005737]; cytosol [GO:0005829]; cytosolic large ribosomal subunit [GO:0022625]; cytosolic ribosome [GO:0022626]; extracellular exosome [GO:0070062]; focal adhesion [GO:0005925]; nucleus [GO:0005634]; synapse [GO:0045202]; metal ion binding [GO:0046872]; RNA binding [GO:0003723]; structural constituent of ribosome [GO:0003735]; cytoplasmic translation [GO:0002181]; translation [GO:00…	metal ion binding [GO:0046872]; RNA binding [GO:0003723]; structural constituent of ribosome [GO:0003735]	GO:0002181; GO:0003723; GO:0003735; GO:0005634; GO:0005737; GO:0005829; GO:0005925; GO:0006412; GO:0022625; GO:0022626; GO:0045202; GO:0046872; GO:0070062
sp|Q05639|EF1A2_HUMAN	EF1A2_HUMAN	52511000	39741000	209460	66435000	23578000	45747000	50906000	84157000	156900	65982000	43627000	23973000	12	4.14186e+07	2.57939e+07	Q05639	Elongation factor 1-alpha 2 (EF-1-alpha-2) (Eukaryotic elongation factor 1 A-2) (eEF1A-2) (Statin-S1)	positive regulation of apoptotic process [GO:0043065]; positive regulation of lipid kinase activity [GO:0090218]; regulation of chaperone-mediated autophagy [GO:1904714]; translation [GO:0006412]; translational elongation [GO:0006414]	cytoplasm [GO:0005737]; cytoplasmic side of lysosomal membrane [GO:0098574]; eukaryotic translation elongation factor 1 complex [GO:0005853]; synapse [GO:0045202]	cytoplasm [GO:0005737]; cytoplasmic side of lysosomal membrane [GO:0098574]; eukaryotic translation elongation factor 1 complex [GO:0005853]; synapse [GO:0045202]; GTP binding [GO:0005525]; GTPase activity [GO:0003924]; protein kinase binding [GO:0019901]; translation elongation factor activity [GO:0003746]; translation factor activity, RNA binding [GO:0008135]; positive regulation of apoptotic p…	GTP binding [GO:0005525]; GTPase activity [GO:0003924]; protein kinase binding [GO:0019901]; translation elongation factor activity [GO:0003746]; translation factor activity, RNA binding [GO:0008135]	GO:0003746; GO:0003924; GO:0005525; GO:0005737; GO:0005853; GO:0006412; GO:0006414; GO:0008135; GO:0019901; GO:0043065; GO:0045202; GO:0090218; GO:0098574; GO:1904714
sp|P60709|ACTB_HUMAN	ACTB_HUMAN	38129000	27903000	1038600	36660000	10998000	38181000	53050000	67889000	1559800	58434000	74719000	60192000	12	3.90628e+07	2.50301e+07	P60709	Actin, cytoplasmic 1 (Beta-actin) [Cleaved into: Actin, cytoplasmic 1, N-terminally processed]	adherens junction assembly [GO:0034333]; apical protein localization [GO:0045176]; cell motility [GO:0048870]; cellular response to cytochalasin B [GO:0072749]; chromatin remodeling [GO:0006338]; establishment or maintenance of cell polarity [GO:0007163]; histone acetylation [GO:0016573]; histone H2A acetylation [GO:0043968]; histone H4 acetylation [GO:0043967]; maintenance of blood-brain barrier…	actin cytoskeleton [GO:0015629]; adherens junction [GO:0005912]; apical junction complex [GO:0043296]; bBAF complex [GO:0140092]; blood microparticle [GO:0072562]; brahma complex [GO:0035060]; brush border [GO:0005903]; calyx of Held [GO:0044305]; cell-cell junction [GO:0005911]; chromatin [GO:0000785]; cortical cytoskeleton [GO:0030863]; cytoplasm [GO:0005737]; cytoplasmic ribonucleoprotein gran…	actin cytoskeleton [GO:0015629]; adherens junction [GO:0005912]; apical junction complex [GO:0043296]; bBAF complex [GO:0140092]; blood microparticle [GO:0072562]; brahma complex [GO:0035060]; brush border [GO:0005903]; calyx of Held [GO:0044305]; cell-cell junction [GO:0005911]; chromatin [GO:0000785]; cortical cytoskeleton [GO:0030863]; cytoplasm [GO:0005737]; cytoplasmic ribonucleoprotein gran…	ATP binding [GO:0005524]; hydrolase activity [GO:0016787]; identical protein binding [GO:0042802]; kinesin binding [GO:0019894]; nitric-oxide synthase binding [GO:0050998]; protein kinase binding [GO:0019901]; structural constituent of cytoskeleton [GO:0005200]; structural constituent of postsynaptic actin cytoskeleton [GO:0098973]; Tat protein binding [GO:0030957]; tau protein binding [GO:004815…	GO:0000079; GO:0000776; GO:0000785; GO:0000786; GO:0001738; GO:0001895; GO:0005200; GO:0005524; GO:0005615; GO:0005634; GO:0005654; GO:0005737; GO:0005829; GO:0005856; GO:0005886; GO:0005903; GO:0005911; GO:0005912; GO:0005925; GO:0006338; GO:0006357; GO:0007163; GO:0008284; GO:0015629; GO:0016020; GO:0016363; GO:0016514; GO:0016573; GO:0016586; GO:0016787; GO:0019894; GO:0019901; GO:0021762; GO:…
sp|P11940|PABP1_HUMAN	PABP1_HUMAN	29375000	33834000	3390500	31928000	51145000	61538000	41514000	59531000	4739700	52575000	71541000	25356000	12	3.88723e+07	2.1582e+07	P11940	Polyadenylate-binding protein 1 (PABP-1) (Poly(A)-binding protein 1)	CRD-mediated mRNA stabilization [GO:0070934]; mRNA polyadenylation [GO:0006378]; mRNA splicing, via spliceosome [GO:0000398]; mRNA stabilization [GO:0048255]; negative regulation of nuclear-transcribed mRNA catabolic process, deadenylation-dependent decay [GO:1900152]; negative regulation of nuclear-transcribed mRNA catabolic process, nonsense-mediated decay [GO:2000623]; nuclear-transcribed mRNA…	catalytic step 2 spliceosome [GO:0071013]; cell leading edge [GO:0031252]; cytoplasm [GO:0005737]; cytoplasmic ribonucleoprotein granule [GO:0036464]; cytoplasmic stress granule [GO:0010494]; cytosol [GO:0005829]; extracellular exosome [GO:0070062]; focal adhesion [GO:0005925]; lamellipodium [GO:0030027]; mCRD-mediated mRNA stability complex [GO:0106002]; membrane [GO:0016020]; nucleus [GO:000563…	catalytic step 2 spliceosome [GO:0071013]; cell leading edge [GO:0031252]; cytoplasm [GO:0005737]; cytoplasmic ribonucleoprotein granule [GO:0036464]; cytoplasmic stress granule [GO:0010494]; cytosol [GO:0005829]; extracellular exosome [GO:0070062]; focal adhesion [GO:0005925]; lamellipodium [GO:0030027]; mCRD-mediated mRNA stability complex [GO:0106002]; membrane [GO:0016020]; nucleus [GO:000563…	mRNA 3'-UTR binding [GO:0003730]; mRNA binding [GO:0003729]; poly(A) binding [GO:0008143]; poly(U) RNA binding [GO:0008266]; RNA binding [GO:0003723]; translation activator activity [GO:0008494]	GO:0000184; GO:0000398; GO:0003723; GO:0003729; GO:0003730; GO:0005634; GO:0005737; GO:0005829; GO:0005925; GO:0006378; GO:0008143; GO:0008266; GO:0008494; GO:0010494; GO:0016020; GO:0030027; GO:0031047; GO:0031252; GO:0036464; GO:0045070; GO:0048255; GO:0060213; GO:0070062; GO:0070934; GO:0071013; GO:0106002; GO:1900152; GO:1900153; GO:1990904; GO:2000623; GO:2000767
sp|P63104|1433Z_HUMAN	1433Z_HUMAN	33177000	18231000	4371900	30128000	32159000	32951000	64795000	85306000	11808000	54199000	54405000	41172000	12	38558575	2.30537e+07	P63104	14-3-3 protein zeta/delta (Protein kinase C inhibitor protein 1) (KCIP-1)	angiogenesis [GO:0001525]; ERK1 and ERK2 cascade [GO:0070371]; establishment of Golgi localization [GO:0051683]; Golgi reassembly [GO:0090168]; lung development [GO:0030324]; negative regulation of apoptotic process [GO:0043066]; negative regulation of innate immune response [GO:0045824]; negative regulation of protein localization to nucleus [GO:1900181]; negative regulation of transcription by …	blood microparticle [GO:0072562]; cytoplasm [GO:0005737]; cytosol [GO:0005829]; extracellular exosome [GO:0070062]; extracellular space [GO:0005615]; focal adhesion [GO:0005925]; glutamatergic synapse [GO:0098978]; hippocampal mossy fiber to CA3 synapse [GO:0098686]; melanosome [GO:0042470]; nucleoplasm [GO:0005654]; nucleus [GO:0005634]; vesicle [GO:0031982]	blood microparticle [GO:0072562]; cytoplasm [GO:0005737]; cytosol [GO:0005829]; extracellular exosome [GO:0070062]; extracellular space [GO:0005615]; focal adhesion [GO:0005925]; glutamatergic synapse [GO:0098978]; hippocampal mossy fiber to CA3 synapse [GO:0098686]; melanosome [GO:0042470]; nucleoplasm [GO:0005654]; nucleus [GO:0005634]; vesicle [GO:0031982]; cadherin binding [GO:0045296]; DNA-b…	cadherin binding [GO:0045296]; DNA-binding transcription factor binding [GO:0140297]; identical protein binding [GO:0042802]; phosphoserine residue binding [GO:0050815]; protein domain specific binding [GO:0019904]; protein kinase binding [GO:0019901]; protein sequestering activity [GO:0140311]; RNA binding [GO:0003723]; transmembrane transporter binding [GO:0044325]; ubiquitin protein ligase bin…	GO:0000122; GO:0001525; GO:0003016; GO:0003723; GO:0005615; GO:0005634; GO:0005654; GO:0005737; GO:0005829; GO:0005925; GO:0006468; GO:0006605; GO:0007165; GO:0008039; GO:0019901; GO:0019904; GO:0030324; GO:0031625; GO:0031982; GO:0035148; GO:0042470; GO:0042802; GO:0043066; GO:0044325; GO:0045296; GO:0045824; GO:0050815; GO:0051683; GO:0070062; GO:0070371; GO:0070372; GO:0072562; GO:0090128; GO:…
sp|P62841|RS15_HUMAN	RS15_HUMAN	36615000	26442000	1565900	28443000	74468000	42249000	39604000	78390000	5133400	50080000	39942000	9945800	12	36073175	2.43247e+07	P62841	40S ribosomal protein S15 (RIG protein) (Small ribosomal subunit protein uS19)	cytoplasmic translation [GO:0002181]; liver regeneration [GO:0097421]; osteoblast differentiation [GO:0001649]; positive regulation of signal transduction by p53 class mediator [GO:1901798]; ribosomal small subunit assembly [GO:0000028]; ribosomal small subunit biogenesis [GO:0042274]; ribosomal small subunit export from nucleus [GO:0000056]; rRNA processing [GO:0006364]; translation [GO:0006412]	cytoplasm [GO:0005737]; cytosol [GO:0005829]; cytosolic ribosome [GO:0022626]; cytosolic small ribosomal subunit [GO:0022627]; focal adhesion [GO:0005925]; membrane [GO:0016020]; nucleoplasm [GO:0005654]; nucleus [GO:0005634]; synapse [GO:0045202]	cytoplasm [GO:0005737]; cytosol [GO:0005829]; cytosolic ribosome [GO:0022626]; cytosolic small ribosomal subunit [GO:0022627]; focal adhesion [GO:0005925]; membrane [GO:0016020]; nucleoplasm [GO:0005654]; nucleus [GO:0005634]; synapse [GO:0045202]; DNA binding [GO:0003677]; MDM2/MDM4 family protein binding [GO:0097371]; RNA binding [GO:0003723]; structural constituent of ribosome [GO:0003735]; ub…	DNA binding [GO:0003677]; MDM2/MDM4 family protein binding [GO:0097371]; RNA binding [GO:0003723]; structural constituent of ribosome [GO:0003735]; ubiquitin ligase inhibitor activity [GO:1990948]	GO:0000028; GO:0000056; GO:0001649; GO:0002181; GO:0003677; GO:0003723; GO:0003735; GO:0005634; GO:0005654; GO:0005737; GO:0005829; GO:0005925; GO:0006364; GO:0006412; GO:0016020; GO:0022626; GO:0022627; GO:0042274; GO:0045202; GO:0097371; GO:0097421; GO:1901798; GO:1990948
sp|P22392|NDKB_HUMAN	NDKB_HUMAN	30528000	20485000	1489700	44106000	35178000	62029000	46888000	29107000	2631400	87649000	36902000	35800000	12	3.60661e+07	2.36517e+07	P22392	Nucleoside diphosphate kinase B (NDK B) (NDP kinase B) (EC 2.7.4.6) (C-myc purine-binding transcription factor PUF) (Histidine protein kinase NDKB) (EC 2.7.13.3) (nm23-H2)	cell adhesion [GO:0007155]; CTP biosynthetic process [GO:0006241]; GTP biosynthetic process [GO:0006183]; integrin-mediated signaling pathway [GO:0007229]; negative regulation of apoptotic process [GO:0043066]; nucleoside triphosphate biosynthetic process [GO:0009142]; positive regulation of DNA-templated transcription [GO:0045893]; positive regulation of epithelial cell proliferation [GO:0050679…	cell periphery [GO:0071944]; cytoplasm [GO:0005737]; cytosol [GO:0005829]; extracellular exosome [GO:0070062]; extracellular region [GO:0005576]; ficolin-1-rich granule lumen [GO:1904813]; lamellipodium [GO:0030027]; nucleus [GO:0005634]; perinuclear region of cytoplasm [GO:0048471]; ruffle [GO:0001726]; secretory granule lumen [GO:0034774]	cell periphery [GO:0071944]; cytoplasm [GO:0005737]; cytosol [GO:0005829]; extracellular exosome [GO:0070062]; extracellular region [GO:0005576]; ficolin-1-rich granule lumen [GO:1904813]; lamellipodium [GO:0030027]; nucleus [GO:0005634]; perinuclear region of cytoplasm [GO:0048471]; ruffle [GO:0001726]; secretory granule lumen [GO:0034774]; ATP binding [GO:0005524]; DNA binding [GO:0003677]; G-q…	ATP binding [GO:0005524]; DNA binding [GO:0003677]; G-quadruplex DNA binding [GO:0051880]; GDP binding [GO:0019003]; metal ion binding [GO:0046872]; nucleoside diphosphate kinase activity [GO:0004550]; protein histidine kinase activity [GO:0004673]; transcription coactivator activity [GO:0003713]	GO:0001726; GO:0003677; GO:0003713; GO:0004550; GO:0004673; GO:0005524; GO:0005576; GO:0005634; GO:0005737; GO:0005829; GO:0006183; GO:0006228; GO:0006241; GO:0007155; GO:0007229; GO:0009142; GO:0019003; GO:0030027; GO:0034774; GO:0042981; GO:0043066; GO:0045618; GO:0045682; GO:0045893; GO:0045944; GO:0046872; GO:0048471; GO:0050679; GO:0051880; GO:0070062; GO:0071944; GO:1904813
sp|P07910|HNRPC_HUMAN	HNRPC_HUMAN	29432000	24025000	4488900	18580000	22250000	22733000	73783000	59689000	5924700	34331000	64701000	65610000	12	35462300	2.41982e+07	P07910	Heterogeneous nuclear ribonucleoproteins C1/C2 (hnRNP C1/C2)	3'-UTR-mediated mRNA stabilization [GO:0070935]; chromatin remodeling [GO:0006338]; mRNA splicing, via spliceosome [GO:0000398]; negative regulation of telomere maintenance via telomerase [GO:0032211]; osteoblast differentiation [GO:0001649]; RNA splicing [GO:0008380]	actin cytoskeleton [GO:0015629]; catalytic step 2 spliceosome [GO:0071013]; chromatin [GO:0000785]; cytosol [GO:0005829]; extracellular exosome [GO:0070062]; extracellular region [GO:0005576]; membrane [GO:0016020]; nucleoplasm [GO:0005654]; nucleus [GO:0005634]; protein-containing complex [GO:0032991]; spliceosomal complex [GO:0005681]; telomerase holoenzyme complex [GO:0005697]	actin cytoskeleton [GO:0015629]; catalytic step 2 spliceosome [GO:0071013]; chromatin [GO:0000785]; cytosol [GO:0005829]; extracellular exosome [GO:0070062]; extracellular region [GO:0005576]; membrane [GO:0016020]; nucleoplasm [GO:0005654]; nucleus [GO:0005634]; protein-containing complex [GO:0032991]; spliceosomal complex [GO:0005681]; telomerase holoenzyme complex [GO:0005697]; identical prote…	identical protein binding [GO:0042802]; mRNA 3'-UTR binding [GO:0003730]; N6-methyladenosine-containing RNA binding [GO:1990247]; nucleosomal DNA binding [GO:0031492]; poly(U) RNA binding [GO:0008266]; RNA binding [GO:0003723]; telomerase RNA binding [GO:0070034]	GO:0000398; GO:0000785; GO:0001649; GO:0003723; GO:0003730; GO:0005576; GO:0005634; GO:0005654; GO:0005681; GO:0005697; GO:0005829; GO:0006338; GO:0008266; GO:0008380; GO:0015629; GO:0016020; GO:0031492; GO:0032211; GO:0032991; GO:0042802; GO:0070034; GO:0070062; GO:0070935; GO:0071013; GO:1990247
sp|P16949|STMN1_HUMAN	STMN1_HUMAN	20757000	20403000	23193000	24283000	16468000	43088000	30373000	60732000	43127000	55260000	50723000	34101000	12	35209000	1.50351e+07	P16949	Stathmin (Leukemia-associated phosphoprotein p18) (Metablastin) (Oncoprotein 18) (Op18) (Phosphoprotein p19) (pp19) (Prosolin) (Protein Pr22) (pp17)	axonogenesis [GO:0007409]; establishment of skin barrier [GO:0061436]; hepatocyte growth factor receptor signaling pathway [GO:0048012]; intracellular signal transduction [GO:0035556]; microtubule depolymerization [GO:0007019]; mitotic cytokinesis [GO:0000281]; mitotic spindle organization [GO:0007052]; negative regulation of guanyl-nucleotide exchange factor activity [GO:1905098]; negative regul…	cytoplasm [GO:0005737]; cytosol [GO:0005829]; extracellular exosome [GO:0070062]; membrane [GO:0016020]; microtubule [GO:0005874]; neuron projection [GO:0043005]	cytoplasm [GO:0005737]; cytosol [GO:0005829]; extracellular exosome [GO:0070062]; membrane [GO:0016020]; microtubule [GO:0005874]; neuron projection [GO:0043005]; tubulin binding [GO:0015631]; axonogenesis [GO:0007409]; establishment of skin barrier [GO:0061436]; hepatocyte growth factor receptor signaling pathway [GO:0048012]; intracellular signal transduction [GO:0035556]; microtubule depolymer…	tubulin binding [GO:0015631]	GO:0000281; GO:0005737; GO:0005829; GO:0005874; GO:0007019; GO:0007052; GO:0007165; GO:0007409; GO:0009615; GO:0015631; GO:0016020; GO:0030334; GO:0031110; GO:0031115; GO:0031175; GO:0035024; GO:0035556; GO:0043005; GO:0048012; GO:0051497; GO:0061436; GO:0070062; GO:0070495; GO:1905098
sp|P62753|RS6_HUMAN	RS6_HUMAN	27171000	27572000	4298200	24735000	32720000	53389000	62626000	54319000	10905000	35247000	53837000	29738000	12	34713100	1.81067e+07	P62753	40S ribosomal protein S6 (Phosphoprotein NP33) (Small ribosomal subunit protein eS6)	activation-induced cell death of T cells [GO:0006924]; cytoplasmic translation [GO:0002181]; erythrocyte development [GO:0048821]; G1/S transition of mitotic cell cycle [GO:0000082]; gastrulation [GO:0007369]; glucose homeostasis [GO:0042593]; mammalian oogenesis stage [GO:0022605]; negative regulation of apoptotic process [GO:0043066]; placenta development [GO:0001890]; positive regulation of ap…	cell body [GO:0044297]; cytoplasm [GO:0005737]; cytoplasmic ribonucleoprotein granule [GO:0036464]; cytosol [GO:0005829]; cytosolic ribosome [GO:0022626]; cytosolic small ribosomal subunit [GO:0022627]; dendrite [GO:0030425]; endoplasmic reticulum [GO:0005783]; membrane [GO:0016020]; nucleolus [GO:0005730]; nucleoplasm [GO:0005654]; nucleus [GO:0005634]; perinuclear region of cytoplasm [GO:004847…	cell body [GO:0044297]; cytoplasm [GO:0005737]; cytoplasmic ribonucleoprotein granule [GO:0036464]; cytosol [GO:0005829]; cytosolic ribosome [GO:0022626]; cytosolic small ribosomal subunit [GO:0022627]; dendrite [GO:0030425]; endoplasmic reticulum [GO:0005783]; membrane [GO:0016020]; nucleolus [GO:0005730]; nucleoplasm [GO:0005654]; nucleus [GO:0005634]; perinuclear region of cytoplasm [GO:004847…	protein kinase binding [GO:0019901]; RNA binding [GO:0003723]; structural constituent of ribosome [GO:0003735]	GO:0000082; GO:0001890; GO:0002181; GO:0002309; GO:0003723; GO:0003735; GO:0005634; GO:0005654; GO:0005730; GO:0005737; GO:0005783; GO:0005829; GO:0005844; GO:0006364; GO:0006412; GO:0006924; GO:0007369; GO:0008284; GO:0015935; GO:0016020; GO:0019901; GO:0022605; GO:0022626; GO:0022627; GO:0030425; GO:0031929; GO:0032040; GO:0033077; GO:0036464; GO:0042274; GO:0042593; GO:0043065; GO:0043066; GO:…
sp|P0DP25|CALM3_HUMAN	CALM3_HUMAN	50087000	21431000	52655000	28703000	21499000	32775000	4705700	6287200	74146000	65947000	37279000	17908000	12	3.44519e+07	2.23125e+07	P0DP25	Calmodulin-3	detection of calcium ion [GO:0005513]; establishment of protein localization to mitochondrial membrane [GO:0090151]; G protein-coupled receptor signaling pathway [GO:0007186]; G2/M transition of mitotic cell cycle [GO:0000086]; negative regulation of calcium ion export across plasma membrane [GO:1905913]; negative regulation of high voltage-gated calcium channel activity [GO:1901842]; negative re…	calcium channel complex [GO:0034704]; catalytic complex [GO:1902494]; centrosome [GO:0005813]; cytoplasm [GO:0005737]; growth cone [GO:0030426]; mitochondrial membrane [GO:0031966]; myelin sheath [GO:0043209]; nucleus [GO:0005634]; plasma membrane [GO:0005886]; protein-containing complex [GO:0032991]; sarcomere [GO:0030017]; sperm midpiece [GO:0097225]; spindle microtubule [GO:0005876]; spindle p…	calcium channel complex [GO:0034704]; catalytic complex [GO:1902494]; centrosome [GO:0005813]; cytoplasm [GO:0005737]; growth cone [GO:0030426]; mitochondrial membrane [GO:0031966]; myelin sheath [GO:0043209]; nucleus [GO:0005634]; plasma membrane [GO:0005886]; protein-containing complex [GO:0032991]; sarcomere [GO:0030017]; sperm midpiece [GO:0097225]; spindle microtubule [GO:0005876]; spindle p…	adenylate cyclase activator activity [GO:0010856]; adenylate cyclase binding [GO:0008179]; calcium ion binding [GO:0005509]; calcium-dependent protein binding [GO:0048306]; nitric-oxide synthase binding [GO:0050998]; nitric-oxide synthase regulator activity [GO:0030235]; phosphatidylinositol 3-kinase binding [GO:0043548]; protein domain specific binding [GO:0019904]; protein kinase binding [GO:00…	GO:0000086; GO:0000922; GO:0001975; GO:0002027; GO:0005509; GO:0005513; GO:0005634; GO:0005737; GO:0005813; GO:0005876; GO:0005886; GO:0007186; GO:0008076; GO:0008179; GO:0010800; GO:0010801; GO:0010856; GO:0010880; GO:0010881; GO:0019901; GO:0019904; GO:0021762; GO:0030017; GO:0030235; GO:0030426; GO:0030672; GO:0031432; GO:0031800; GO:0031954; GO:0031966; GO:0031982; GO:0032465; GO:0032516; GO:…
sp|P40429|RL13A_HUMAN	RL13A_HUMAN	17415000	13410000	5643300	18703000	39955000	41509000	58342000	97128000	17634000	41646000	35002000	22902000	12	3.41074e+07	2.49672e+07	P40429	60S ribosomal protein L13a (23 kDa highly basic protein) (Large ribosomal subunit protein uL13)	cellular response to type II interferon [GO:0071346]; cytoplasmic translation [GO:0002181]; homeostatic process [GO:0042592]; lung morphogenesis [GO:0060425]; macrophage chemotaxis [GO:0048246]; negative regulation of formation of translation preinitiation complex [GO:1901194]; negative regulation of translation [GO:0017148]; response to lipopolysaccharide [GO:0032496]; translation [GO:0006412]	cytoplasm [GO:0005737]; cytosol [GO:0005829]; cytosolic large ribosomal subunit [GO:0022625]; cytosolic ribosome [GO:0022626]; focal adhesion [GO:0005925]; GAIT complex [GO:0097452]; large ribosomal subunit [GO:0015934]; membrane [GO:0016020]; nucleolus [GO:0005730]; nucleus [GO:0005634]; ribonucleoprotein complex [GO:1990904]; ribosome [GO:0005840]; synapse [GO:0045202]	cytoplasm [GO:0005737]; cytosol [GO:0005829]; cytosolic large ribosomal subunit [GO:0022625]; cytosolic ribosome [GO:0022626]; focal adhesion [GO:0005925]; GAIT complex [GO:0097452]; large ribosomal subunit [GO:0015934]; membrane [GO:0016020]; nucleolus [GO:0005730]; nucleus [GO:0005634]; ribonucleoprotein complex [GO:1990904]; ribosome [GO:0005840]; synapse [GO:0045202]; mRNA binding [GO:0003729…	mRNA binding [GO:0003729]; RNA binding [GO:0003723]; structural constituent of ribosome [GO:0003735]	GO:0002181; GO:0003723; GO:0003729; GO:0003735; GO:0005634; GO:0005730; GO:0005737; GO:0005829; GO:0005840; GO:0005925; GO:0006412; GO:0015934; GO:0016020; GO:0017148; GO:0022625; GO:0022626; GO:0032496; GO:0042592; GO:0045202; GO:0048246; GO:0060425; GO:0071346; GO:0097452; GO:1901194; GO:1990904
sp|P41567|EIF1_HUMAN	EIF1_HUMAN	26919000	34364000	30495000	24390000	28286000	53079000	42609000	31886000	25803000	59725000	35399000	14401000	12	3.39463e+07	1.25957e+07	P41567	Eukaryotic translation initiation factor 1 (eIF1) (A121) (Protein translation factor SUI1 homolog) (Sui1iso1)	regulation of translational initiation [GO:0006446]; translational initiation [GO:0006413]	cytoplasm [GO:0005737]; eukaryotic 43S preinitiation complex [GO:0016282]; eukaryotic 48S preinitiation complex [GO:0033290]; multi-eIF complex [GO:0043614]; nucleus [GO:0005634]	cytoplasm [GO:0005737]; eukaryotic 43S preinitiation complex [GO:0016282]; eukaryotic 48S preinitiation complex [GO:0033290]; multi-eIF complex [GO:0043614]; nucleus [GO:0005634]; ribosomal small subunit binding [GO:0043024]; RNA binding [GO:0003723]; translation factor activity, RNA binding [GO:0008135]; translation initiation factor activity [GO:0003743]; regulation of translational initiation …	ribosomal small subunit binding [GO:0043024]; RNA binding [GO:0003723]; translation factor activity, RNA binding [GO:0008135]; translation initiation factor activity [GO:0003743]	GO:0003723; GO:0003743; GO:0005634; GO:0005737; GO:0006413; GO:0006446; GO:0008135; GO:0016282; GO:0033290; GO:0043024; GO:0043614
sp|P31948|STIP1_HUMAN	STIP1_HUMAN	28891000	29485000	1265900	32514000	18590000	37877000	69914000	57158000	1705300	63843000	43427000	21794000	12	3.3872e+07	2.20949e+07	P31948	Stress-induced-phosphoprotein 1 (STI1) (Hsc70/Hsp90-organizing protein) (Hop) (Renal carcinoma antigen NY-REN-11) (Transformation-sensitive protein IEF SSP 3521)	cellular response to interleukin-7 [GO:0098761]	cytosol [GO:0005829]; dynein axonemal particle [GO:0120293]; Golgi apparatus [GO:0005794]; nucleus [GO:0005634]; protein folding chaperone complex [GO:0101031]; protein-containing complex [GO:0032991]	cytosol [GO:0005829]; dynein axonemal particle [GO:0120293]; Golgi apparatus [GO:0005794]; nucleus [GO:0005634]; protein folding chaperone complex [GO:0101031]; protein-containing complex [GO:0032991]; Hsp90 protein binding [GO:0051879]; RNA binding [GO:0003723]; cellular response to interleukin-7 [GO:0098761]	Hsp90 protein binding [GO:0051879]; RNA binding [GO:0003723]	GO:0003723; GO:0005634; GO:0005794; GO:0005829; GO:0032991; GO:0051879; GO:0098761; GO:0101031; GO:0120293
sp|P62314|SMD1_HUMAN	SMD1_HUMAN	53437000	32589000	42251000	22852000	6745200	27340000	34724000	9119300	46436000	38443000	62182000	20749000	12	3.30723e+07	1.6822e+07	P62314	Small nuclear ribonucleoprotein Sm D1 (Sm-D1) (Sm-D autoantigen) (snRNP core protein D1)	7-methylguanosine cap hypermethylation [GO:0036261]; mRNA splicing, via spliceosome [GO:0000398]; RNA splicing [GO:0008380]; spliceosomal complex assembly [GO:0000245]; spliceosomal snRNP assembly [GO:0000387]; U2-type prespliceosome assembly [GO:1903241]	catalytic step 2 spliceosome [GO:0071013]; commitment complex [GO:0000243]; cytosol [GO:0005829]; methylosome [GO:0034709]; nucleoplasm [GO:0005654]; nucleus [GO:0005634]; pICln-Sm protein complex [GO:0034715]; precatalytic spliceosome [GO:0071011]; small nuclear ribonucleoprotein complex [GO:0030532]; SMN-Sm protein complex [GO:0034719]; spliceosomal complex [GO:0005681]; spliceosomal tri-snRNP …	catalytic step 2 spliceosome [GO:0071013]; commitment complex [GO:0000243]; cytosol [GO:0005829]; methylosome [GO:0034709]; nucleoplasm [GO:0005654]; nucleus [GO:0005634]; pICln-Sm protein complex [GO:0034715]; precatalytic spliceosome [GO:0071011]; small nuclear ribonucleoprotein complex [GO:0030532]; SMN-Sm protein complex [GO:0034719]; spliceosomal complex [GO:0005681]; spliceosomal tri-snRNP …	RNA binding [GO:0003723]; U1 snRNP binding [GO:1990446]	GO:0000243; GO:0000245; GO:0000387; GO:0000398; GO:0003723; GO:0005634; GO:0005654; GO:0005681; GO:0005682; GO:0005685; GO:0005686; GO:0005687; GO:0005689; GO:0005829; GO:0008380; GO:0030532; GO:0034709; GO:0034715; GO:0034719; GO:0036261; GO:0046540; GO:0071005; GO:0071007; GO:0071011; GO:0071013; GO:0097526; GO:1903241; GO:1990446
sp|P42677|RS27_HUMAN	RS27_HUMAN	18960000	18448000	2927100	25602000	70147000	59853000	38462000	28272000	6875200	62803000	43850000	8461500	12	3.20551e+07	2.29645e+07	P42677	40S ribosomal protein S27 (Metallopan-stimulin 1) (MPS-1) (Small ribosomal subunit protein eS27)	cytoplasmic translation [GO:0002181]; ribosomal small subunit assembly [GO:0000028]; ribosomal small subunit biogenesis [GO:0042274]; rRNA processing [GO:0006364]; translation [GO:0006412]	cytosol [GO:0005829]; cytosolic ribosome [GO:0022626]; cytosolic small ribosomal subunit [GO:0022627]; nucleolus [GO:0005730]; nucleoplasm [GO:0005654]; nucleus [GO:0005634]; postsynaptic density [GO:0014069]; ribosome [GO:0005840]; small-subunit processome [GO:0032040]	cytosol [GO:0005829]; cytosolic ribosome [GO:0022626]; cytosolic small ribosomal subunit [GO:0022627]; nucleolus [GO:0005730]; nucleoplasm [GO:0005654]; nucleus [GO:0005634]; postsynaptic density [GO:0014069]; ribosome [GO:0005840]; small-subunit processome [GO:0032040]; DNA binding [GO:0003677]; RNA binding [GO:0003723]; structural constituent of ribosome [GO:0003735]; zinc ion binding [GO:00082…	DNA binding [GO:0003677]; RNA binding [GO:0003723]; structural constituent of ribosome [GO:0003735]; zinc ion binding [GO:0008270]	GO:0000028; GO:0002181; GO:0003677; GO:0003723; GO:0003735; GO:0005634; GO:0005654; GO:0005730; GO:0005829; GO:0005840; GO:0006364; GO:0006412; GO:0008270; GO:0014069; GO:0022626; GO:0022627; GO:0032040; GO:0042274
sp|P05556|ITB1_HUMAN	ITB1_HUMAN	15800000	21398000	3658500	21598000	24121000	30909000	78129000	81378000	4479500	41675000	34860000	23572000	12	3.17982e+07	2.4946e+07	P05556	Integrin beta-1 (Fibronectin receptor subunit beta) (Glycoprotein IIa) (GPIIA) (VLA-4 subunit beta) (CD antigen CD29)	axon extension [GO:0048675]; B cell differentiation [GO:0030183]; basement membrane organization [GO:0071711]; calcium-independent cell-matrix adhesion [GO:0007161]; cardiac cell fate specification [GO:0060912]; cardiac muscle cell differentiation [GO:0055007]; cardiac muscle cell myoblast differentiation [GO:0060379]; CD40 signaling pathway [GO:0023035]; cell adhesion [GO:0007155]; cell adhesion…	cell surface [GO:0009986]; cerebellar climbing fiber to Purkinje cell synapse [GO:0150053]; cleavage furrow [GO:0032154]; cytoplasm [GO:0005737]; dendritic spine [GO:0043197]; endosome membrane [GO:0010008]; external side of plasma membrane [GO:0009897]; extracellular exosome [GO:0070062]; filopodium [GO:0030175]; focal adhesion [GO:0005925]; glial cell projection [GO:0097386]; integrin alpha1-be…	cell surface [GO:0009986]; cerebellar climbing fiber to Purkinje cell synapse [GO:0150053]; cleavage furrow [GO:0032154]; cytoplasm [GO:0005737]; dendritic spine [GO:0043197]; endosome membrane [GO:0010008]; external side of plasma membrane [GO:0009897]; extracellular exosome [GO:0070062]; filopodium [GO:0030175]; focal adhesion [GO:0005925]; glial cell projection [GO:0097386]; integrin alpha1-be…	actin binding [GO:0003779]; cadherin binding [GO:0045296]; calcium ion binding [GO:0005509]; cell adhesion molecule binding [GO:0050839]; collagen binding involved in cell-matrix adhesion [GO:0098639]; coreceptor activity [GO:0015026]; fibronectin binding [GO:0001968]; integrin binding [GO:0005178]; laminin binding [GO:0043236]; magnesium ion binding [GO:0000287]; protease binding [GO:0002020]; p…	GO:0000082; GO:0000132; GO:0000287; GO:0001618; GO:0001701; GO:0001726; GO:0001968; GO:0002020; GO:0002042; GO:0002052; GO:0003779; GO:0005178; GO:0005509; GO:0005737; GO:0005886; GO:0005925; GO:0006909; GO:0006968; GO:0007155; GO:0007156; GO:0007159; GO:0007160; GO:0007161; GO:0007229; GO:0007405; GO:0007517; GO:0007520; GO:0008305; GO:0008354; GO:0008542; GO:0009897; GO:0009986; GO:0010008; GO:…
sp|P07195|LDHB_HUMAN	LDHB_HUMAN	40653000	25675000	5057100	22447000	22517000	29003000	40665000	56417000	25446000	44248000	38031000	27911000	12	3.15058e+07	1.32986e+07	P07195	L-lactate dehydrogenase B chain (LDH-B) (EC 1.1.1.27) (LDH heart subunit) (LDH-H) (Renal carcinoma antigen NY-REN-46)	lactate metabolic process [GO:0006089]; NAD metabolic process [GO:0019674]; pyruvate metabolic process [GO:0006090]	cytoplasm [GO:0005737]; cytosol [GO:0005829]; extracellular exosome [GO:0070062]; membrane [GO:0016020]; membrane raft [GO:0045121]; mitochondrial inner membrane [GO:0005743]; mitochondrion [GO:0005739]; oxidoreductase complex [GO:1990204]	cytoplasm [GO:0005737]; cytosol [GO:0005829]; extracellular exosome [GO:0070062]; membrane [GO:0016020]; membrane raft [GO:0045121]; mitochondrial inner membrane [GO:0005743]; mitochondrion [GO:0005739]; oxidoreductase complex [GO:1990204]; identical protein binding [GO:0042802]; kinase binding [GO:0019900]; L-lactate dehydrogenase activity [GO:0004459]; NAD binding [GO:0051287]; lactate metaboli…	identical protein binding [GO:0042802]; kinase binding [GO:0019900]; L-lactate dehydrogenase activity [GO:0004459]; NAD binding [GO:0051287]	GO:0004459; GO:0005737; GO:0005739; GO:0005743; GO:0005829; GO:0006089; GO:0006090; GO:0016020; GO:0019674; GO:0019900; GO:0042802; GO:0045121; GO:0051287; GO:0070062; GO:1990204
sp|P62826|RAN_HUMAN	RAN_HUMAN	31498000	7772200	967310	38293000	22240000	21309000	57807000	102480000	1593800	39871000	38797000	15155000	12	3.14819e+07	2.81975e+07	P62826	GTP-binding nuclear protein Ran (Androgen receptor-associated protein 24) (GTPase Ran) (Ras-like protein TC4) (Ras-related nuclear protein)	actin cytoskeleton organization [GO:0030036]; cell division [GO:0051301]; cellular response to mineralocorticoid stimulus [GO:0071389]; DNA metabolic process [GO:0006259]; GTP metabolic process [GO:0046039]; hippocampus development [GO:0021766]; mitotic cell cycle [GO:0000278]; mitotic sister chromatid segregation [GO:0000070]; mitotic spindle organization [GO:0007052]; positive regulation of pro…	centriole [GO:0005814]; cytoplasm [GO:0005737]; cytosol [GO:0005829]; extracellular exosome [GO:0070062]; male germ cell nucleus [GO:0001673]; manchette [GO:0002177]; melanosome [GO:0042470]; membrane [GO:0016020]; midbody [GO:0030496]; nuclear envelope [GO:0005635]; nuclear pore [GO:0005643]; nucleolus [GO:0005730]; nucleoplasm [GO:0005654]; nucleus [GO:0005634]; protein-containing complex [GO:0…	centriole [GO:0005814]; cytoplasm [GO:0005737]; cytosol [GO:0005829]; extracellular exosome [GO:0070062]; male germ cell nucleus [GO:0001673]; manchette [GO:0002177]; melanosome [GO:0042470]; membrane [GO:0016020]; midbody [GO:0030496]; nuclear envelope [GO:0005635]; nuclear pore [GO:0005643]; nucleolus [GO:0005730]; nucleoplasm [GO:0005654]; nucleus [GO:0005634]; protein-containing complex [GO:0…	cadherin binding [GO:0045296]; chromatin binding [GO:0003682]; dynein intermediate chain binding [GO:0045505]; G protein activity [GO:0003925]; GDP binding [GO:0019003]; GTP binding [GO:0005525]; GTPase activity [GO:0003924]; importin-alpha family protein binding [GO:0061676]; magnesium ion binding [GO:0000287]; protein domain specific binding [GO:0019904]; protein heterodimerization activity [GO…	GO:0000054; GO:0000055; GO:0000056; GO:0000070; GO:0000278; GO:0000287; GO:0001673; GO:0002177; GO:0003682; GO:0003723; GO:0003924; GO:0003925; GO:0005525; GO:0005634; GO:0005635; GO:0005643; GO:0005654; GO:0005730; GO:0005737; GO:0005814; GO:0005829; GO:0006259; GO:0006606; GO:0006611; GO:0007052; GO:0007286; GO:0016020; GO:0016032; GO:0019003; GO:0019904; GO:0021766; GO:0030036; GO:0030496; GO:…
sp|Q02543|RL18A_HUMAN	RL18A_HUMAN	17000000	29035000	2575300	11362000	28960000	33417000	63793000	68327000	10901000	23780000	49598000	26873000	12	3.04684e+07	2.06437e+07	Q02543	60S ribosomal protein L18a (Large ribosomal subunit protein eL20)	cytoplasmic translation [GO:0002181]; translation [GO:0006412]	cytoplasm [GO:0005737]; cytosol [GO:0005829]; cytosolic large ribosomal subunit [GO:0022625]; cytosolic ribosome [GO:0022626]; membrane [GO:0016020]; polysomal ribosome [GO:0042788]	cytoplasm [GO:0005737]; cytosol [GO:0005829]; cytosolic large ribosomal subunit [GO:0022625]; cytosolic ribosome [GO:0022626]; membrane [GO:0016020]; polysomal ribosome [GO:0042788]; RNA binding [GO:0003723]; structural constituent of ribosome [GO:0003735]; cytoplasmic translation [GO:0002181]; translation [GO:0006412]	RNA binding [GO:0003723]; structural constituent of ribosome [GO:0003735]	GO:0002181; GO:0003723; GO:0003735; GO:0005737; GO:0005829; GO:0006412; GO:0016020; GO:0022625; GO:0022626; GO:0042788
sp|P30041|PRDX6_HUMAN	PRDX6_HUMAN	39694000	26144000	1550400	24779000	27533000	52710000	38714000	14575000	1874000	71876000	34104000	30488000	12	3.03368e+07	1.98668e+07	P30041	Peroxiredoxin-6 (EC 1.11.1.27) (1-Cys peroxiredoxin) (1-Cys PRX) (24 kDa protein) (Acidic calcium-independent phospholipase A2) (aiPLA2) (EC 3.1.1.4) (Antioxidant protein 2) (Glutathione-dependent peroxiredoxin) (Liver 2D page spot 40) (Lysophosphatidylcholine acyltransferase 5) (LPC acyltransferase 5) (LPCAT-5) (Lyso-PC acyltransferase 5) (EC 2.3.1.23) (Non-selenium glutathione peroxidase) (NSGP…	cell redox homeostasis [GO:0045454]; cellular oxidant detoxification [GO:0098869]; glycerophospholipid catabolic process [GO:0046475]; positive regulation of mRNA splicing, via spliceosome [GO:0048026]; response to oxidative stress [GO:0006979]	azurophil granule lumen [GO:0035578]; cytoplasm [GO:0005737]; cytosol [GO:0005829]; extracellular exosome [GO:0070062]; extracellular region [GO:0005576]; extracellular space [GO:0005615]; membrane [GO:0016020]; mitochondrion [GO:0005739]; nucleus [GO:0005634]; perinuclear region of cytoplasm [GO:0048471]	azurophil granule lumen [GO:0035578]; cytoplasm [GO:0005737]; cytosol [GO:0005829]; extracellular exosome [GO:0070062]; extracellular region [GO:0005576]; extracellular space [GO:0005615]; membrane [GO:0016020]; mitochondrion [GO:0005739]; nucleus [GO:0005634]; perinuclear region of cytoplasm [GO:0048471]; 1-acylglycerophosphocholine O-acyltransferase activity [GO:0047184]; cadherin binding [GO:0…	1-acylglycerophosphocholine O-acyltransferase activity [GO:0047184]; cadherin binding [GO:0045296]; calcium-independent phospholipase A2 activity [GO:0047499]; glutathione peroxidase activity [GO:0004602]; identical protein binding [GO:0042802]; peroxiredoxin activity [GO:0051920]; phospholipase A2 activity [GO:0004623]; ubiquitin protein ligase binding [GO:0031625]	GO:0004602; GO:0004623; GO:0005576; GO:0005615; GO:0005634; GO:0005737; GO:0005739; GO:0005829; GO:0006979; GO:0016020; GO:0031625; GO:0035578; GO:0042802; GO:0045296; GO:0045454; GO:0046475; GO:0047184; GO:0047499; GO:0048026; GO:0048471; GO:0051920; GO:0070062; GO:0098869
sp|P40926|MDHM_HUMAN	MDHM_HUMAN	25913000	25023000	8993300	22674000	19751000	39072000	35973000	20549000	12071000	60235000	36450000	54756000	12	3.01217e+07	1.57787e+07	P40926	Malate dehydrogenase, mitochondrial (EC 1.1.1.37)	aerobic respiration [GO:0009060]; gluconeogenesis [GO:0006094]; malate metabolic process [GO:0006108]; NADH metabolic process [GO:0006734]; oxaloacetate metabolic process [GO:0006107]; tricarboxylic acid cycle [GO:0006099]	cytoplasm [GO:0005737]; extracellular exosome [GO:0070062]; membrane [GO:0016020]; mitochondrial matrix [GO:0005759]; mitochondrion [GO:0005739]; nucleus [GO:0005634]	cytoplasm [GO:0005737]; extracellular exosome [GO:0070062]; membrane [GO:0016020]; mitochondrial matrix [GO:0005759]; mitochondrion [GO:0005739]; nucleus [GO:0005634]; L-malate dehydrogenase activity [GO:0030060]; malate dehydrogenase (NADP+) activity [GO:0046554]; protein self-association [GO:0043621]; RNA binding [GO:0003723]; aerobic respiration [GO:0009060]; gluconeogenesis [GO:0006094]; mala…	L-malate dehydrogenase activity [GO:0030060]; malate dehydrogenase (NADP+) activity [GO:0046554]; protein self-association [GO:0043621]; RNA binding [GO:0003723]	GO:0003723; GO:0005634; GO:0005737; GO:0005739; GO:0005759; GO:0006094; GO:0006099; GO:0006107; GO:0006108; GO:0006734; GO:0009060; GO:0016020; GO:0030060; GO:0043621; GO:0046554; GO:0070062
sp|P47914|RL29_HUMAN	RL29_HUMAN	3278000	8084000	10418000	9180100	25840000	24338000	38523000	175700000	23989000	16093000	15360000	9055200	12	2.99882e+07	4.69471e+07	P47914	60S ribosomal protein L29 (Cell surface heparin-binding protein HIP) (Large ribosomal subunit protein eL29)	cytoplasmic translation [GO:0002181]; embryo implantation [GO:0007566]; translation [GO:0006412]	cytoplasm [GO:0005737]; cytosol [GO:0005829]; cytosolic large ribosomal subunit [GO:0022625]; cytosolic ribosome [GO:0022626]; membrane [GO:0016020]	cytoplasm [GO:0005737]; cytosol [GO:0005829]; cytosolic large ribosomal subunit [GO:0022625]; cytosolic ribosome [GO:0022626]; membrane [GO:0016020]; cadherin binding [GO:0045296]; heparin binding [GO:0008201]; RNA binding [GO:0003723]; structural constituent of ribosome [GO:0003735]; cytoplasmic translation [GO:0002181]; embryo implantation [GO:0007566]; translation [GO:0006412]	cadherin binding [GO:0045296]; heparin binding [GO:0008201]; RNA binding [GO:0003723]; structural constituent of ribosome [GO:0003735]	GO:0002181; GO:0003723; GO:0003735; GO:0005737; GO:0005829; GO:0006412; GO:0007566; GO:0008201; GO:0016020; GO:0022625; GO:0022626; GO:0045296
sp|P61313|RL15_HUMAN	RL15_HUMAN	10756000	8285400	11109000	14949000	30666000	18738000	79329000	100070000	23114000	25655000	19077000	14431000	12	2.96816e+07	2.91118e+07	P61313	60S ribosomal protein L15 (Large ribosomal subunit protein eL15)	cytoplasmic translation [GO:0002181]; response to ethanol [GO:0045471]; translation [GO:0006412]	A band [GO:0031672]; cytoplasm [GO:0005737]; cytosol [GO:0005829]; cytosolic large ribosomal subunit [GO:0022625]; cytosolic ribosome [GO:0022626]; nucleus [GO:0005634]; ribosome [GO:0005840]; synapse [GO:0045202]	A band [GO:0031672]; cytoplasm [GO:0005737]; cytosol [GO:0005829]; cytosolic large ribosomal subunit [GO:0022625]; cytosolic ribosome [GO:0022626]; nucleus [GO:0005634]; ribosome [GO:0005840]; synapse [GO:0045202]; cadherin binding [GO:0045296]; RNA binding [GO:0003723]; structural constituent of ribosome [GO:0003735]; cytoplasmic translation [GO:0002181]; response to ethanol [GO:0045471]; transl…	cadherin binding [GO:0045296]; RNA binding [GO:0003723]; structural constituent of ribosome [GO:0003735]	GO:0002181; GO:0003723; GO:0003735; GO:0005634; GO:0005737; GO:0005829; GO:0005840; GO:0006412; GO:0022625; GO:0022626; GO:0031672; GO:0045202; GO:0045296; GO:0045471
sp|P61978|HNRPK_HUMAN	HNRPK_HUMAN	35210000	24823000	5047700	25143000	11883000	27310000	29592000	76215000	7123000	37053000	50014000	24182000	12	2.94663e+07	1.94836e+07	P61978	Heterogeneous nuclear ribonucleoprotein K (hnRNP K) (Transformation up-regulated nuclear protein) (TUNP)	mRNA splicing, via spliceosome [GO:0000398]; negative regulation of apoptotic process [GO:0043066]; negative regulation of DNA-templated transcription [GO:0045892]; negative regulation of mRNA splicing, via spliceosome [GO:0048025]; positive regulation of low-density lipoprotein receptor activity [GO:1905599]; positive regulation of receptor-mediated endocytosis [GO:0048260]; positive regulation …	catalytic step 2 spliceosome [GO:0071013]; cell projection [GO:0042995]; chromatin [GO:0000785]; cytoplasm [GO:0005737]; cytoplasmic stress granule [GO:0010494]; extracellular exosome [GO:0070062]; focal adhesion [GO:0005925]; membrane [GO:0016020]; nucleoplasm [GO:0005654]; nucleus [GO:0005634]; podosome [GO:0002102]; ribonucleoprotein complex [GO:1990904]	catalytic step 2 spliceosome [GO:0071013]; cell projection [GO:0042995]; chromatin [GO:0000785]; cytoplasm [GO:0005737]; cytoplasmic stress granule [GO:0010494]; extracellular exosome [GO:0070062]; focal adhesion [GO:0005925]; membrane [GO:0016020]; nucleoplasm [GO:0005654]; nucleus [GO:0005634]; podosome [GO:0002102]; ribonucleoprotein complex [GO:1990904]; cadherin binding [GO:0045296]; DNA bin…	cadherin binding [GO:0045296]; DNA binding [GO:0003677]; identical protein binding [GO:0042802]; mRNA binding [GO:0003729]; protein domain specific binding [GO:0019904]; RNA binding [GO:0003723]	GO:0000398; GO:0000785; GO:0002102; GO:0003677; GO:0003723; GO:0003729; GO:0005634; GO:0005654; GO:0005737; GO:0005925; GO:0006357; GO:0006396; GO:0007165; GO:0010494; GO:0010988; GO:0016020; GO:0019904; GO:0042802; GO:0042995; GO:0043066; GO:0045296; GO:0045892; GO:0045944; GO:0048024; GO:0048025; GO:0048260; GO:0070062; GO:0071013; GO:1902165; GO:1905599; GO:1990904
sp|P46781|RS9_HUMAN	RS9_HUMAN	23637000	18559000	6352400	11742000	46356000	30496000	35511000	68500000	22699000	21455000	39593000	27842000	12	29395200	1.66868e+07	P46781	40S ribosomal protein S9 (Small ribosomal subunit protein uS4)	cytoplasmic translation [GO:0002181]; positive regulation of cell population proliferation [GO:0008284]; ribosomal small subunit biogenesis [GO:0042274]; translation [GO:0006412]	cytoplasm [GO:0005737]; cytosol [GO:0005829]; cytosolic ribosome [GO:0022626]; cytosolic small ribosomal subunit [GO:0022627]; extracellular exosome [GO:0070062]; focal adhesion [GO:0005925]; membrane [GO:0016020]; nucleolus [GO:0005730]; nucleoplasm [GO:0005654]; nucleus [GO:0005634]; ribonucleoprotein complex [GO:1990904]; ribosome [GO:0005840]; small-subunit processome [GO:0032040]; synapse [G…	cytoplasm [GO:0005737]; cytosol [GO:0005829]; cytosolic ribosome [GO:0022626]; cytosolic small ribosomal subunit [GO:0022627]; extracellular exosome [GO:0070062]; focal adhesion [GO:0005925]; membrane [GO:0016020]; nucleolus [GO:0005730]; nucleoplasm [GO:0005654]; nucleus [GO:0005634]; ribonucleoprotein complex [GO:1990904]; ribosome [GO:0005840]; small-subunit processome [GO:0032040]; synapse [G…	RNA binding [GO:0003723]; rRNA binding [GO:0019843]; structural constituent of ribosome [GO:0003735]; translation regulator activity [GO:0045182]	GO:0002181; GO:0003723; GO:0003735; GO:0005634; GO:0005654; GO:0005730; GO:0005737; GO:0005829; GO:0005840; GO:0005925; GO:0006412; GO:0008284; GO:0016020; GO:0019843; GO:0022626; GO:0022627; GO:0032040; GO:0042274; GO:0045182; GO:0045202; GO:0070062; GO:1990904
sp|P46783|RS10_HUMAN	RS10_HUMAN	56555000	27725000	2200900	20800000	31548000	12491000	43452000	69708000	1215800	13418000	48421000	23212000	12	2.92289e+07	2.15664e+07	P46783	40S ribosomal protein S10 (Small ribosomal subunit protein eS10)	cytoplasmic translation [GO:0002181]; translation [GO:0006412]	cytoplasm [GO:0005737]; cytosol [GO:0005829]; cytosolic ribosome [GO:0022626]; cytosolic small ribosomal subunit [GO:0022627]; focal adhesion [GO:0005925]; membrane [GO:0016020]; nucleolus [GO:0005730]; nucleoplasm [GO:0005654]; ribosome [GO:0005840]	cytoplasm [GO:0005737]; cytosol [GO:0005829]; cytosolic ribosome [GO:0022626]; cytosolic small ribosomal subunit [GO:0022627]; focal adhesion [GO:0005925]; membrane [GO:0016020]; nucleolus [GO:0005730]; nucleoplasm [GO:0005654]; ribosome [GO:0005840]; RNA binding [GO:0003723]; structural constituent of ribosome [GO:0003735]; cytoplasmic translation [GO:0002181]; translation [GO:0006412]	RNA binding [GO:0003723]; structural constituent of ribosome [GO:0003735]	GO:0002181; GO:0003723; GO:0003735; GO:0005654; GO:0005730; GO:0005737; GO:0005829; GO:0005840; GO:0005925; GO:0006412; GO:0016020; GO:0022626; GO:0022627
sp|Q14103|HNRPD_HUMAN	HNRPD_HUMAN	19477000	16340000	3218800	28678000	28161000	29173000	44317000	78146000	6077600	56757000	25566000	10401000	12	2.88594e+07	2.17836e+07	Q14103	Heterogeneous nuclear ribonucleoprotein D0 (hnRNP D0) (AU-rich element RNA-binding protein 1)	3'-UTR-mediated mRNA destabilization [GO:0061158]; cellular response to amino acid stimulus [GO:0071230]; cellular response to estradiol stimulus [GO:0071392]; cellular response to nitric oxide [GO:0071732]; cellular response to putrescine [GO:1904586]; cerebellum development [GO:0021549]; circadian regulation of translation [GO:0097167]; CRD-mediated mRNA stabilization [GO:0070934]; hepatocyte d…	cytosol [GO:0005829]; glutamatergic synapse [GO:0098978]; mCRD-mediated mRNA stability complex [GO:0106002]; nucleoplasm [GO:0005654]; nucleus [GO:0005634]; postsynaptic density [GO:0014069]; ribonucleoprotein complex [GO:1990904]	cytosol [GO:0005829]; glutamatergic synapse [GO:0098978]; mCRD-mediated mRNA stability complex [GO:0106002]; nucleoplasm [GO:0005654]; nucleus [GO:0005634]; postsynaptic density [GO:0014069]; ribonucleoprotein complex [GO:1990904]; chromatin binding [GO:0003682]; histone deacetylase binding [GO:0042826]; minor groove of adenine-thymine-rich DNA binding [GO:0003680]; mRNA 3'-UTR AU-rich region bin…	chromatin binding [GO:0003682]; histone deacetylase binding [GO:0042826]; minor groove of adenine-thymine-rich DNA binding [GO:0003680]; mRNA 3'-UTR AU-rich region binding [GO:0035925]; RNA binding [GO:0003723]; telomeric DNA binding [GO:0042162]	GO:0001889; GO:0003680; GO:0003682; GO:0003723; GO:0005634; GO:0005654; GO:0005829; GO:0006355; GO:0006396; GO:0006401; GO:0010468; GO:0014069; GO:0021549; GO:0032204; GO:0035925; GO:0042162; GO:0042752; GO:0042789; GO:0042826; GO:0045727; GO:0045893; GO:0045944; GO:0051592; GO:0051602; GO:0061158; GO:0070934; GO:0071230; GO:0071392; GO:0071732; GO:0097167; GO:0098978; GO:0106002; GO:1900152; GO:…
sp|P30044|PRDX5_HUMAN	PRDX5_HUMAN	30114000	29195000	7193100	35327000	17230000	35348000	47327000	25024000	6323000	52213000	35663000	25049000	12	2.88338e+07	1.40134e+07	P30044	Peroxiredoxin-5, mitochondrial (EC 1.11.1.24) (Alu corepressor 1) (Antioxidant enzyme B166) (AOEB166) (Liver tissue 2D-page spot 71B) (PLP) (Peroxiredoxin V) (Prx-V) (Peroxisomal antioxidant enzyme) (TPx type VI) (Thioredoxin peroxidase PMP20) (Thioredoxin-dependent peroxiredoxin 5)	cell redox homeostasis [GO:0045454]; cellular response to oxidative stress [GO:0034599]; cellular response to reactive oxygen species [GO:0034614]; hydrogen peroxide catabolic process [GO:0042744]; inflammatory response [GO:0006954]; NADPH oxidation [GO:0070995]; negative regulation of apoptotic process [GO:0043066]; negative regulation of oxidoreductase activity [GO:0051354]; negative regulation…	cytoplasm [GO:0005737]; cytoplasmic vesicle [GO:0031410]; cytosol [GO:0005829]; extracellular exosome [GO:0070062]; extracellular space [GO:0005615]; intracellular membrane-bounded organelle [GO:0043231]; mitochondrial matrix [GO:0005759]; mitochondrion [GO:0005739]; nucleus [GO:0005634]; perinuclear region of cytoplasm [GO:0048471]; peroxisomal matrix [GO:0005782]; peroxisome [GO:0005777]	cytoplasm [GO:0005737]; cytoplasmic vesicle [GO:0031410]; cytosol [GO:0005829]; extracellular exosome [GO:0070062]; extracellular space [GO:0005615]; intracellular membrane-bounded organelle [GO:0043231]; mitochondrial matrix [GO:0005759]; mitochondrion [GO:0005739]; nucleus [GO:0005634]; perinuclear region of cytoplasm [GO:0048471]; peroxisomal matrix [GO:0005782]; peroxisome [GO:0005777]; antio…	antioxidant activity [GO:0016209]; cysteine-type endopeptidase inhibitor activity involved in apoptotic process [GO:0043027]; identical protein binding [GO:0042802]; peroxidase activity [GO:0004601]; peroxynitrite reductase activity [GO:0072541]; RNA polymerase III transcription regulatory region sequence-specific DNA binding [GO:0001016]; signaling receptor binding [GO:0005102]; thioredoxin pero…	GO:0001016; GO:0004601; GO:0005102; GO:0005615; GO:0005634; GO:0005737; GO:0005739; GO:0005759; GO:0005777; GO:0005782; GO:0005829; GO:0006954; GO:0006979; GO:0008379; GO:0016209; GO:0016480; GO:0031410; GO:0032967; GO:0034599; GO:0034614; GO:0042744; GO:0042802; GO:0043027; GO:0043066; GO:0043231; GO:0045454; GO:0048471; GO:0051354; GO:0060785; GO:0070062; GO:0070995; GO:0072541; GO:2001057
sp|P12268|IMDH2_HUMAN	IMDH2_HUMAN	15598000	13636000	2459700	32310000	14254000	29219000	51299000	84708000	2399600	49641000	32163000	10979000	12	2.82222e+07	2.41402e+07	P12268	Inosine-5'-monophosphate dehydrogenase 2 (IMP dehydrogenase 2) (IMPD 2) (IMPDH 2) (EC 1.1.1.205) (Inosine-5'-monophosphate dehydrogenase type II) (IMP dehydrogenase II) (IMPDH-II)	'de novo' XMP biosynthetic process [GO:0097294]; cellular response to interleukin-4 [GO:0071353]; circadian rhythm [GO:0007623]; GMP biosynthetic process [GO:0006177]; GTP biosynthetic process [GO:0006183]; lymphocyte proliferation [GO:0046651]; retina development in camera-type eye [GO:0060041]	cytoplasm [GO:0005737]; cytosol [GO:0005829]; extracellular exosome [GO:0070062]; extracellular region [GO:0005576]; ficolin-1-rich granule lumen [GO:1904813]; membrane [GO:0016020]; nucleus [GO:0005634]; peroxisomal membrane [GO:0005778]; secretory granule lumen [GO:0034774]	cytoplasm [GO:0005737]; cytosol [GO:0005829]; extracellular exosome [GO:0070062]; extracellular region [GO:0005576]; ficolin-1-rich granule lumen [GO:1904813]; membrane [GO:0016020]; nucleus [GO:0005634]; peroxisomal membrane [GO:0005778]; secretory granule lumen [GO:0034774]; DNA binding [GO:0003677]; identical protein binding [GO:0042802]; IMP dehydrogenase activity [GO:0003938]; metal ion bind…	DNA binding [GO:0003677]; identical protein binding [GO:0042802]; IMP dehydrogenase activity [GO:0003938]; metal ion binding [GO:0046872]; nucleotide binding [GO:0000166]; RNA binding [GO:0003723]	GO:0000166; GO:0003677; GO:0003723; GO:0003938; GO:0005576; GO:0005634; GO:0005737; GO:0005778; GO:0005829; GO:0006177; GO:0006183; GO:0007623; GO:0016020; GO:0034774; GO:0042802; GO:0046651; GO:0046872; GO:0060041; GO:0070062; GO:0071353; GO:0097294; GO:1904813
sp|P16403|H12_HUMAN	H12_HUMAN	11723000	14363000	9046900	10314000	16887000	21525000	49725000	119200000	11658000	21798000	20111000	28385000	12	2.78947e+07	3.08155e+07	P16403	Histone H1.2 (Histone H1c) (Histone H1d) (Histone H1s-1)	chromosome condensation [GO:0030261]; histone H3-K27 trimethylation [GO:0098532]; histone H3-K4 trimethylation [GO:0080182]; negative regulation of DNA recombination [GO:0045910]; negative regulation of transcription by RNA polymerase II [GO:0000122]; nucleosome assembly [GO:0006334]	euchromatin [GO:0000791]; nucleosome [GO:0000786]; nucleus [GO:0005634]	euchromatin [GO:0000791]; nucleosome [GO:0000786]; nucleus [GO:0005634]; chromatin DNA binding [GO:0031490]; double-stranded DNA binding [GO:0003690]; nucleosomal DNA binding [GO:0031492]; RNA binding [GO:0003723]; structural constituent of chromatin [GO:0030527]; chromosome condensation [GO:0030261]; histone H3-K27 trimethylation [GO:0098532]; histone H3-K4 trimethylation [GO:0080182]; negative …	chromatin DNA binding [GO:0031490]; double-stranded DNA binding [GO:0003690]; nucleosomal DNA binding [GO:0031492]; RNA binding [GO:0003723]; structural constituent of chromatin [GO:0030527]	GO:0000122; GO:0000786; GO:0000791; GO:0003690; GO:0003723; GO:0005634; GO:0006334; GO:0030261; GO:0030527; GO:0031490; GO:0031492; GO:0045910; GO:0080182; GO:0098532
sp|P25705|ATPA_HUMAN	ATPA_HUMAN	20947000	31843000	897780	21589000	19252000	36343000	35189000	16995000	1119600	67026000	54336000	28558000	12	2.78413e+07	1.9302e+07	P25705	ATP synthase subunit alpha, mitochondrial (ATP synthase F1 subunit alpha)	aging [GO:0007568]; apoptotic process [GO:0006915]; ATP biosynthetic process [GO:0006754]; cellular response to dexamethasone stimulus [GO:0071549]; cellular response to nitric oxide [GO:0071732]; lipid metabolic process [GO:0006629]; negative regulation of endothelial cell proliferation [GO:0001937]; positive regulation of blood vessel endothelial cell migration [GO:0043536]; proton motive force…	cell surface [GO:0009986]; extracellular exosome [GO:0070062]; membrane [GO:0016020]; membrane raft [GO:0045121]; mitochondrial inner membrane [GO:0005743]; mitochondrial matrix [GO:0005759]; mitochondrial proton-transporting ATP synthase complex [GO:0005753]; mitochondrial proton-transporting ATP synthase, catalytic core [GO:0005754]; mitochondrion [GO:0005739]; nucleus [GO:0005634]; plasma memb…	cell surface [GO:0009986]; extracellular exosome [GO:0070062]; membrane [GO:0016020]; membrane raft [GO:0045121]; mitochondrial inner membrane [GO:0005743]; mitochondrial matrix [GO:0005759]; mitochondrial proton-transporting ATP synthase complex [GO:0005753]; mitochondrial proton-transporting ATP synthase, catalytic core [GO:0005754]; mitochondrion [GO:0005739]; nucleus [GO:0005634]; plasma memb…	ADP binding [GO:0043531]; angiostatin binding [GO:0043532]; ATP binding [GO:0005524]; ATP hydrolysis activity [GO:0016887]; MHC class I protein binding [GO:0042288]; protease binding [GO:0002020]; proton-transporting ATP synthase activity, rotational mechanism [GO:0046933]; RNA binding [GO:0003723]	GO:0001937; GO:0002020; GO:0003723; GO:0005524; GO:0005634; GO:0005739; GO:0005743; GO:0005753; GO:0005754; GO:0005759; GO:0005886; GO:0006629; GO:0006754; GO:0006915; GO:0007568; GO:0009986; GO:0014850; GO:0015986; GO:0016020; GO:0016887; GO:0042288; GO:0042776; GO:0043531; GO:0043532; GO:0043536; GO:0045121; GO:0045259; GO:0045261; GO:0045471; GO:0046933; GO:0070062; GO:0071549; GO:0071732
sp|P61604|CH10_HUMAN	CH10_HUMAN	41536000	11912000	19308000	9542000	10366000	47543000	14320000	36008000	33447000	55502000	36080000	18279000	12	27820250	1.58053e+07	P61604	10 kDa heat shock protein, mitochondrial (Hsp10) (10 kDa chaperonin) (Chaperonin 10) (CPN10) (Early-pregnancy factor) (EPF)	activation of cysteine-type endopeptidase activity involved in apoptotic process [GO:0006919]; chaperone cofactor-dependent protein refolding [GO:0051085]; osteoblast differentiation [GO:0001649]; protein folding [GO:0006457]; response to unfolded protein [GO:0006986]	extracellular exosome [GO:0070062]; membrane [GO:0016020]; mitochondrial matrix [GO:0005759]; mitochondrion [GO:0005739]	extracellular exosome [GO:0070062]; membrane [GO:0016020]; mitochondrial matrix [GO:0005759]; mitochondrion [GO:0005739]; ATP binding [GO:0005524]; metal ion binding [GO:0046872]; protein folding chaperone [GO:0044183]; protein-folding chaperone binding [GO:0051087]; RNA binding [GO:0003723]; unfolded protein binding [GO:0051082]; activation of cysteine-type endopeptidase activity involved in apo…	ATP binding [GO:0005524]; metal ion binding [GO:0046872]; protein folding chaperone [GO:0044183]; protein-folding chaperone binding [GO:0051087]; RNA binding [GO:0003723]; unfolded protein binding [GO:0051082]	GO:0001649; GO:0003723; GO:0005524; GO:0005739; GO:0005759; GO:0006457; GO:0006919; GO:0006986; GO:0016020; GO:0044183; GO:0046872; GO:0051082; GO:0051085; GO:0051087; GO:0070062
sp|P62979|RS27A_HUMAN	RS27A_HUMAN	17128000	16558000	4452200	22677000	27208000	43980000	46626000	35281000	4159400	41733000	40457000	29027000	12	27440550	1.47628e+07	P62979	Ubiquitin-40S ribosomal protein S27a (Ubiquitin carboxyl extension protein 80) [Cleaved into: Ubiquitin; 40S ribosomal protein S27a (Small ribosomal subunit protein eS31)]	cytoplasmic translation [GO:0002181]; modification-dependent protein catabolic process [GO:0019941]; protein ubiquitination [GO:0016567]; ribosomal small subunit biogenesis [GO:0042274]; translation [GO:0006412]	cytoplasm [GO:0005737]; cytosol [GO:0005829]; cytosolic ribosome [GO:0022626]; cytosolic small ribosomal subunit [GO:0022627]; endocytic vesicle membrane [GO:0030666]; endoplasmic reticulum membrane [GO:0005789]; endosome membrane [GO:0010008]; extracellular exosome [GO:0070062]; extracellular space [GO:0005615]; membrane [GO:0016020]; mitochondrial outer membrane [GO:0005741]; nucleolus [GO:0005…	cytoplasm [GO:0005737]; cytosol [GO:0005829]; cytosolic ribosome [GO:0022626]; cytosolic small ribosomal subunit [GO:0022627]; endocytic vesicle membrane [GO:0030666]; endoplasmic reticulum membrane [GO:0005789]; endosome membrane [GO:0010008]; extracellular exosome [GO:0070062]; extracellular space [GO:0005615]; membrane [GO:0016020]; mitochondrial outer membrane [GO:0005741]; nucleolus [GO:0005…	metal ion binding [GO:0046872]; protein tag [GO:0031386]; RNA binding [GO:0003723]; structural constituent of ribosome [GO:0003735]; ubiquitin protein ligase binding [GO:0031625]	GO:0002181; GO:0003723; GO:0003735; GO:0005615; GO:0005634; GO:0005654; GO:0005730; GO:0005737; GO:0005741; GO:0005789; GO:0005829; GO:0005886; GO:0006412; GO:0010008; GO:0015935; GO:0016020; GO:0016567; GO:0019941; GO:0022626; GO:0022627; GO:0030666; GO:0031386; GO:0031625; GO:0031982; GO:0032040; GO:0042274; GO:0046872; GO:0070062
sp|P63313|TYB10_HUMAN	TYB10_HUMAN	20271000	25682000	30216000	26005000	27157000	27708000	2737400	2961100	48528000	35239000	37204000	38259000	12	26830625	1.34411e+07	P63313	Thymosin beta-10	actin filament organization [GO:0007015]; regulation of cell migration [GO:0030334]; sequestering of actin monomers [GO:0042989]	cytoplasm [GO:0005737]; cytoskeleton [GO:0005856]	cytoplasm [GO:0005737]; cytoskeleton [GO:0005856]; actin monomer binding [GO:0003785]; actin filament organization [GO:0007015]; regulation of cell migration [GO:0030334]; sequestering of actin monomers [GO:0042989]	actin monomer binding [GO:0003785]	GO:0003785; GO:0005737; GO:0005856; GO:0007015; GO:0030334; GO:0042989
sp|P62316|SMD2_HUMAN	SMD2_HUMAN	27891000	24016000	10045000	8103300	8994500	22704000	37215000	78843000	11033000	38053000	30142000	21245000	12	2.65237e+07	1.95549e+07	P62316	Small nuclear ribonucleoprotein Sm D2 (Sm-D2) (snRNP core protein D2)	7-methylguanosine cap hypermethylation [GO:0036261]; mRNA splicing, via spliceosome [GO:0000398]; RNA splicing [GO:0008380]; spliceosomal complex assembly [GO:0000245]; spliceosomal snRNP assembly [GO:0000387]; U2-type prespliceosome assembly [GO:1903241]	catalytic step 2 spliceosome [GO:0071013]; cytosol [GO:0005829]; extracellular exosome [GO:0070062]; methylosome [GO:0034709]; nucleoplasm [GO:0005654]; nucleus [GO:0005634]; pICln-Sm protein complex [GO:0034715]; precatalytic spliceosome [GO:0071011]; small nuclear ribonucleoprotein complex [GO:0030532]; SMN-Sm protein complex [GO:0034719]; spliceosomal complex [GO:0005681]; U1 snRNP [GO:0005685…	catalytic step 2 spliceosome [GO:0071013]; cytosol [GO:0005829]; extracellular exosome [GO:0070062]; methylosome [GO:0034709]; nucleoplasm [GO:0005654]; nucleus [GO:0005634]; pICln-Sm protein complex [GO:0034715]; precatalytic spliceosome [GO:0071011]; small nuclear ribonucleoprotein complex [GO:0030532]; SMN-Sm protein complex [GO:0034719]; spliceosomal complex [GO:0005681]; U1 snRNP [GO:0005685…	RNA binding [GO:0003723]	GO:0000245; GO:0000387; GO:0000398; GO:0003723; GO:0005634; GO:0005654; GO:0005681; GO:0005682; GO:0005685; GO:0005686; GO:0005687; GO:0005689; GO:0005829; GO:0008380; GO:0030532; GO:0034709; GO:0034715; GO:0034719; GO:0036261; GO:0046540; GO:0070062; GO:0071005; GO:0071007; GO:0071011; GO:0071013; GO:1903241
sp|P10599|THIO_HUMAN	THIO_HUMAN	9491700	16626000	907820	37000000	46558000	48730000	43239000	26249000	242220	54627000	15194000	18388000	12	2.64377e+07	1.90762e+07	P10599	Thioredoxin (Trx) (ATL-derived factor) (ADF) (Surface-associated sulphydryl protein) (SASP) (allergen Hom s Trx)	activation of protein kinase B activity [GO:0032148]; cell redox homeostasis [GO:0045454]; negative regulation of hydrogen peroxide-induced cell death [GO:1903206]; negative regulation of protein export from nucleus [GO:0046826]; negative regulation of transcription by RNA polymerase II [GO:0000122]; positive regulation of DNA binding [GO:0043388]; positive regulation of peptidyl-cysteine S-nitro…	cytoplasm [GO:0005737]; cytosol [GO:0005829]; extracellular exosome [GO:0070062]; extracellular region [GO:0005576]; nucleoplasm [GO:0005654]; nucleus [GO:0005634]	cytoplasm [GO:0005737]; cytosol [GO:0005829]; extracellular exosome [GO:0070062]; extracellular region [GO:0005576]; nucleoplasm [GO:0005654]; nucleus [GO:0005634]; protein homodimerization activity [GO:0042803]; protein-disulfide reductase (NAD(P)) activity [GO:0047134]; protein-disulfide reductase activity [GO:0015035]; RNA binding [GO:0003723]; thioredoxin-disulfide reductase activity [GO:0004…	protein homodimerization activity [GO:0042803]; protein-disulfide reductase (NAD(P)) activity [GO:0047134]; protein-disulfide reductase activity [GO:0015035]; RNA binding [GO:0003723]; thioredoxin-disulfide reductase activity [GO:0004791]	GO:0000122; GO:0003723; GO:0004791; GO:0005576; GO:0005634; GO:0005654; GO:0005737; GO:0005829; GO:0009314; GO:0015035; GO:0032148; GO:0033138; GO:0042803; GO:0043388; GO:0045454; GO:0046826; GO:0047134; GO:0051897; GO:0070062; GO:0071731; GO:1903206; GO:2000170
sp|P08195|4F2_HUMAN	4F2_HUMAN	10583000	22825000	8671700	21978000	19372000	22050000	68196000	47454000	14356000	36974000	24307000	17298000	12	2.61721e+07	1.70528e+07	P08195	4F2 cell-surface antigen heavy chain (4F2hc) (4F2 heavy chain antigen) (Lymphocyte activation antigen 4F2 large subunit) (Solute carrier family 3 member 2) (CD antigen CD98)	amino acid transport [GO:0006865]; calcium ion transport [GO:0006816]; carbohydrate metabolic process [GO:0005975]; isoleucine transport [GO:0015818]; L-alanine import across plasma membrane [GO:1904273]; L-histidine transport [GO:1902024]; L-leucine import across plasma membrane [GO:1903801]; leucine import across plasma membrane [GO:0098713]; leucine transport [GO:0015820]; methionine transport…	amino acid transport complex [GO:1990184]; anchoring junction [GO:0070161]; apical plasma membrane [GO:0016324]; apical pole of neuron [GO:0044225]; basal plasma membrane [GO:0009925]; basolateral plasma membrane [GO:0016323]; cell surface [GO:0009986]; extracellular exosome [GO:0070062]; lysosomal membrane [GO:0005765]; melanosome [GO:0042470]; membrane [GO:0016020]; nucleoplasm [GO:0005654]; pl…	amino acid transport complex [GO:1990184]; anchoring junction [GO:0070161]; apical plasma membrane [GO:0016324]; apical pole of neuron [GO:0044225]; basal plasma membrane [GO:0009925]; basolateral plasma membrane [GO:0016323]; cell surface [GO:0009986]; extracellular exosome [GO:0070062]; lysosomal membrane [GO:0005765]; melanosome [GO:0042470]; membrane [GO:0016020]; nucleoplasm [GO:0005654]; pl…	aromatic amino acid transmembrane transporter activity [GO:0015173]; cadherin binding [GO:0045296]; calcium:sodium antiporter activity [GO:0005432]; double-stranded RNA binding [GO:0003725]; L-alanine transmembrane transporter activity [GO:0015180]; L-leucine transmembrane transporter activity [GO:0015190]; neutral L-amino acid transmembrane transporter activity [GO:0015175]; RNA binding [GO:0003…	GO:0003723; GO:0003725; GO:0005432; GO:0005654; GO:0005765; GO:0005886; GO:0005975; GO:0006816; GO:0006865; GO:0009925; GO:0009986; GO:0015173; GO:0015175; GO:0015180; GO:0015190; GO:0015818; GO:0015820; GO:0015821; GO:0015823; GO:0015824; GO:0015827; GO:0015828; GO:0015829; GO:0016020; GO:0016323; GO:0016324; GO:0042470; GO:0043330; GO:0044225; GO:0045202; GO:0045296; GO:0046718; GO:0070062; GO:…
sp|P30040|ERP29_HUMAN	ERP29_HUMAN	44046000	31117000	1244600	22504000	19385000	25391000	29916000	24490000	1594700	47995000	32743000	29824000	12	2.58542e+07	1.40708e+07	P30040	Endoplasmic reticulum resident protein 29 (ERp29) (Endoplasmic reticulum resident protein 28) (ERp28) (Endoplasmic reticulum resident protein 31) (ERp31)	intracellular protein transport [GO:0006886]; negative regulation of gene expression [GO:0010629]; negative regulation of protein secretion [GO:0050709]; positive regulation of gene expression [GO:0010628]; positive regulation of MAP kinase activity [GO:0043406]; positive regulation of protein phosphorylation [GO:0001934]; protein folding [GO:0006457]; protein secretion [GO:0009306]; protein unfo…	cell surface [GO:0009986]; endoplasmic reticulum [GO:0005783]; endoplasmic reticulum lumen [GO:0005788]; melanosome [GO:0042470]; membrane [GO:0016020]; smooth endoplasmic reticulum [GO:0005790]; transport vesicle [GO:0030133]	cell surface [GO:0009986]; endoplasmic reticulum [GO:0005783]; endoplasmic reticulum lumen [GO:0005788]; melanosome [GO:0042470]; membrane [GO:0016020]; smooth endoplasmic reticulum [GO:0005790]; transport vesicle [GO:0030133]; protein homodimerization activity [GO:0042803]; protein-folding chaperone binding [GO:0051087]; intracellular protein transport [GO:0006886]; negative regulation of gene e…	protein homodimerization activity [GO:0042803]; protein-folding chaperone binding [GO:0051087]	GO:0001934; GO:0005783; GO:0005788; GO:0005790; GO:0006457; GO:0006886; GO:0009306; GO:0009986; GO:0010628; GO:0010629; GO:0016020; GO:0030133; GO:0042470; GO:0042803; GO:0043335; GO:0043406; GO:0050709; GO:0051087; GO:1902235
sp|P61960|UFM1_HUMAN	UFM1_HUMAN	43276000	29876000	2000000	29249000	16653000	28671000	30952000	41946000	1676000	26640000	21360000	36151000	12	2.57042e+07	1.34466e+07	P61960	Ubiquitin-fold modifier 1	brain development [GO:0007420]; negative regulation of apoptotic process [GO:0043066]; negative regulation of protein import into nucleus [GO:0042308]; protein K69-linked ufmylation [GO:1990592]; protein ufmylation [GO:0071569]; regulation of intracellular estrogen receptor signaling pathway [GO:0033146]; response to endoplasmic reticulum stress [GO:0034976]; reticulophagy [GO:0061709]	cytoplasm [GO:0005737]; endoplasmic reticulum [GO:0005783]; nucleus [GO:0005634]	cytoplasm [GO:0005737]; endoplasmic reticulum [GO:0005783]; nucleus [GO:0005634]; brain development [GO:0007420]; negative regulation of apoptotic process [GO:0043066]; negative regulation of protein import into nucleus [GO:0042308]; protein K69-linked ufmylation [GO:1990592]; protein ufmylation [GO:0071569]; regulation of intracellular estrogen receptor signaling pathway [GO:0033146]; response t…		GO:0005634; GO:0005737; GO:0005783; GO:0007420; GO:0033146; GO:0034976; GO:0042308; GO:0043066; GO:0061709; GO:0071569; GO:1990592
sp|P61769|B2MG_HUMAN	B2MG_HUMAN	7883100	60009000	41682000	49703000	12105000	19330000	17228000	16964000	13903000	7586200	51015000	9872900	12	2.56068e+07	1.92073e+07	P61769	Beta-2-microglobulin [Cleaved into: Beta-2-microglobulin form pI 5.3]	amyloid fibril formation [GO:1990000]; antibacterial humoral response [GO:0019731]; antigen processing and presentation of endogenous peptide antigen via MHC class I [GO:0019885]; antigen processing and presentation of exogenous peptide antigen via MHC class II [GO:0019886]; antigen processing and presentation of exogenous protein antigen via MHC class Ib, TAP-dependent [GO:0002481]; antimicrobia…	cytosol [GO:0005829]; early endosome lumen [GO:0031905]; early endosome membrane [GO:0031901]; endoplasmic reticulum lumen [GO:0005788]; ER to Golgi transport vesicle membrane [GO:0012507]; external side of plasma membrane [GO:0009897]; extracellular exosome [GO:0070062]; extracellular region [GO:0005576]; extracellular space [GO:0005615]; focal adhesion [GO:0005925]; Golgi apparatus [GO:0005794]…	cytosol [GO:0005829]; early endosome lumen [GO:0031905]; early endosome membrane [GO:0031901]; endoplasmic reticulum lumen [GO:0005788]; ER to Golgi transport vesicle membrane [GO:0012507]; external side of plasma membrane [GO:0009897]; extracellular exosome [GO:0070062]; extracellular region [GO:0005576]; extracellular space [GO:0005615]; focal adhesion [GO:0005925]; Golgi apparatus [GO:0005794]…	identical protein binding [GO:0042802]; MHC class II protein complex binding [GO:0023026]; protein homodimerization activity [GO:0042803]	GO:0000139; GO:0001895; GO:0001913; GO:0001916; GO:0002237; GO:0002481; GO:0002503; GO:0002726; GO:0003254; GO:0005576; GO:0005615; GO:0005788; GO:0005794; GO:0005829; GO:0005886; GO:0005925; GO:0006826; GO:0006879; GO:0007608; GO:0007611; GO:0009897; GO:0010977; GO:0012507; GO:0016020; GO:0019731; GO:0019885; GO:0019886; GO:0023026; GO:0030670; GO:0031901; GO:0031905; GO:0032092; GO:0033077; GO:…
tr|A0A087WWU8|A0A087WWU8_HUMAN	A0A087WWU8_HUMAN	23246000	15082000	20295000	23097000	11762000	31202000	33849000	26205000	22652000	50883000	29166000	17118000	12	25379750	1.03303e+07	A0A087WWU8	Tropomyosin alpha-3 chain		cytoskeleton [GO:0005856]	cytoskeleton [GO:0005856]; actin binding [GO:0003779]	actin binding [GO:0003779]	GO:0003779; GO:0005856
sp|P18669|PGAM1_HUMAN	PGAM1_HUMAN	28862000	19655000	503590	29664000	17946000	37218000	41882000	35587000	1670600	43002000	23132000	16625000	12	2.46456e+07	1.41482e+07	P18669	Phosphoglycerate mutase 1 (EC 5.4.2.11) (EC 5.4.2.4) (BPG-dependent PGAM 1) (Phosphoglycerate mutase isozyme B) (PGAM-B)	canonical glycolysis [GO:0061621]; gluconeogenesis [GO:0006094]; glycolytic process [GO:0006096]; regulation of glycolytic process [GO:0006110]; regulation of pentose-phosphate shunt [GO:0043456]; respiratory burst [GO:0045730]	cytoplasm [GO:0005737]; cytosol [GO:0005829]; extracellular exosome [GO:0070062]; extracellular region [GO:0005576]; ficolin-1-rich granule lumen [GO:1904813]; membrane [GO:0016020]; secretory granule lumen [GO:0034774]	cytoplasm [GO:0005737]; cytosol [GO:0005829]; extracellular exosome [GO:0070062]; extracellular region [GO:0005576]; ficolin-1-rich granule lumen [GO:1904813]; membrane [GO:0016020]; secretory granule lumen [GO:0034774]; 2,3-bisphosphoglycerate-dependent phosphoglycerate mutase activity [GO:0046538]; bisphosphoglycerate mutase activity [GO:0004082]; hydrolase activity [GO:0016787]; phosphoglycera…	2,3-bisphosphoglycerate-dependent phosphoglycerate mutase activity [GO:0046538]; bisphosphoglycerate mutase activity [GO:0004082]; hydrolase activity [GO:0016787]; phosphoglycerate mutase activity [GO:0004619]; protein kinase binding [GO:0019901]	GO:0004082; GO:0004619; GO:0005576; GO:0005737; GO:0005829; GO:0006094; GO:0006096; GO:0006110; GO:0016020; GO:0016787; GO:0019901; GO:0034774; GO:0043456; GO:0045730; GO:0046538; GO:0061621; GO:0070062; GO:1904813
sp|P06454|PTMA_HUMAN	PTMA_HUMAN	10381000	7484800	24189000	20343000	4945000	0	21296000	55649000	110380000	15691000	10209000	6565600	11	2.39278e+07	3.08137e+07	P06454	Prothymosin alpha [Cleaved into: Prothymosin alpha, N-terminally processed; Thymosin alpha-1]	DNA-templated transcription [GO:0006351]; negative regulation of apoptotic process [GO:0043066]; positive regulation of transcription by RNA polymerase II [GO:0045944]	cytosol [GO:0005829]; nucleoplasm [GO:0005654]; nucleus [GO:0005634]	cytosol [GO:0005829]; nucleoplasm [GO:0005654]; nucleus [GO:0005634]; DNA-binding transcription factor binding [GO:0140297]; histone binding [GO:0042393]; ion binding [GO:0043167]; DNA-templated transcription [GO:0006351]; negative regulation of apoptotic process [GO:0043066]; positive regulation of transcription by RNA polymerase II [GO:0045944]	DNA-binding transcription factor binding [GO:0140297]; histone binding [GO:0042393]; ion binding [GO:0043167]	GO:0005634; GO:0005654; GO:0005829; GO:0006351; GO:0042393; GO:0043066; GO:0043167; GO:0045944; GO:0140297
sp|Q00610|CLH1_HUMAN	CLH1_HUMAN	12156000	11304000	2737300	11551000	15538000	16119000	71571000	73834000	13102000	19765000	23646000	12604000	12	2.36606e+07	2.34598e+07	Q00610	Clathrin heavy chain 1 (Clathrin heavy chain on chromosome 17) (CLH-17)	amyloid-beta clearance by transcytosis [GO:0150093]; autophagy [GO:0006914]; cell division [GO:0051301]; clathrin coat assembly [GO:0048268]; clathrin-dependent endocytosis [GO:0072583]; intracellular protein transport [GO:0006886]; mitotic cell cycle [GO:0000278]; negative regulation of hyaluronan biosynthetic process [GO:1900126]; negative regulation of protein localization to plasma membrane […	clathrin coat [GO:0030118]; clathrin coat of coated pit [GO:0030132]; clathrin coat of trans-Golgi network vesicle [GO:0030130]; clathrin complex [GO:0071439]; clathrin-coated endocytic vesicle [GO:0045334]; clathrin-coated endocytic vesicle membrane [GO:0030669]; clathrin-coated vesicle [GO:0030136]; cytosol [GO:0005829]; endolysosome membrane [GO:0036020]; endosome [GO:0005768]; extracellular e…	clathrin coat [GO:0030118]; clathrin coat of coated pit [GO:0030132]; clathrin coat of trans-Golgi network vesicle [GO:0030130]; clathrin complex [GO:0071439]; clathrin-coated endocytic vesicle [GO:0045334]; clathrin-coated endocytic vesicle membrane [GO:0030669]; clathrin-coated vesicle [GO:0030136]; cytosol [GO:0005829]; endolysosome membrane [GO:0036020]; endosome [GO:0005768]; extracellular e…	clathrin light chain binding [GO:0032051]; disordered domain specific binding [GO:0097718]; double-stranded RNA binding [GO:0003725]; low-density lipoprotein particle receptor binding [GO:0050750]; protein kinase binding [GO:0019901]; RNA binding [GO:0003723]; structural molecule activity [GO:0005198]; ubiquitin-specific protease binding [GO:1990381]	GO:0000278; GO:0001649; GO:0003723; GO:0003725; GO:0005198; GO:0005764; GO:0005768; GO:0005819; GO:0005829; GO:0005886; GO:0005925; GO:0006886; GO:0006898; GO:0006914; GO:0016020; GO:0019901; GO:0030118; GO:0030130; GO:0030132; GO:0030136; GO:0030669; GO:0031623; GO:0032051; GO:0032588; GO:0032991; GO:0033572; GO:0036020; GO:0042147; GO:0042470; GO:0045334; GO:0048268; GO:0050750; GO:0051301; GO:…
sp|P60983|GMFB_HUMAN	GMFB_HUMAN	2139000	2298900	224770	1585200	0	264560000	1169300	6910700	462080	1008400	2281900	247030	11	23573940	7.59134e+07	P60983	Glia maturation factor beta (GMF-beta)	actin filament debranching [GO:0071846]; negative regulation of Arp2/3 complex-mediated actin nucleation [GO:0034316]; nervous system development [GO:0007399]; protein phosphorylation [GO:0006468]		actin binding [GO:0003779]; Arp2/3 complex binding [GO:0071933]; enzyme activator activity [GO:0008047]; growth factor activity [GO:0008083]; protein kinase inhibitor activity [GO:0004860]; actin filament debranching [GO:0071846]; negative regulation of Arp2/3 complex-mediated actin nucleation [GO:0034316]; nervous system development [GO:0007399]; protein phosphorylation [GO:0006468]	actin binding [GO:0003779]; Arp2/3 complex binding [GO:0071933]; enzyme activator activity [GO:0008047]; growth factor activity [GO:0008083]; protein kinase inhibitor activity [GO:0004860]	GO:0003779; GO:0004860; GO:0006468; GO:0007399; GO:0008047; GO:0008083; GO:0034316; GO:0071846; GO:0071933
sp|P09429|HMGB1_HUMAN	HMGB1_HUMAN	8146700	5493800	2080600	26786000	22396000	52200000	47112000	19949000	1104900	70979000	12196000	5288200	12	2.2811e+07	2.26317e+07	P09429	High mobility group protein B1 (High mobility group protein 1) (HMG-1)	activation of innate immune response [GO:0002218]; apoptotic cell clearance [GO:0043277]; autophagy [GO:0006914]; cellular response to lipopolysaccharide [GO:0071222]; dendritic cell chemotaxis [GO:0002407]; DNA geometric change [GO:0032392]; DNA recombination [GO:0006310]; DNA topological change [GO:0006265]; double-strand break repair via nonhomologous end joining [GO:0006303]; heterochromatin …	alphav-beta3 integrin-HMGB1 complex [GO:0035868]; cell surface [GO:0009986]; condensed chromosome [GO:0000793]; endoplasmic reticulum [GO:0005783]; endoplasmic reticulum-Golgi intermediate compartment [GO:0005793]; endosome [GO:0005768]; extracellular region [GO:0005576]; extracellular space [GO:0005615]; ficolin-1-rich granule lumen [GO:1904813]; nucleoplasm [GO:0005654]; nucleus [GO:0005634]; s…	alphav-beta3 integrin-HMGB1 complex [GO:0035868]; cell surface [GO:0009986]; condensed chromosome [GO:0000793]; endoplasmic reticulum [GO:0005783]; endoplasmic reticulum-Golgi intermediate compartment [GO:0005793]; endosome [GO:0005768]; extracellular region [GO:0005576]; extracellular space [GO:0005615]; ficolin-1-rich granule lumen [GO:1904813]; nucleoplasm [GO:0005654]; nucleus [GO:0005634]; s…	bubble DNA binding [GO:0000405]; C-X-C chemokine binding [GO:0019958]; chemoattractant activity [GO:0042056]; cytokine activity [GO:0005125]; damaged DNA binding [GO:0003684]; DNA binding, bending [GO:0008301]; DNA polymerase binding [GO:0070182]; DNA-binding transcription factor binding [GO:0140297]; double-stranded DNA binding [GO:0003690]; four-way junction DNA binding [GO:0000400]; integrin b…	GO:0000122; GO:0000400; GO:0000405; GO:0000793; GO:0000976; GO:0001530; GO:0001773; GO:0001786; GO:0002218; GO:0002407; GO:0002437; GO:0002643; GO:0002840; GO:0003684; GO:0003690; GO:0003697; GO:0003713; GO:0003714; GO:0003723; GO:0005125; GO:0005178; GO:0005576; GO:0005615; GO:0005634; GO:0005654; GO:0005768; GO:0005783; GO:0005793; GO:0006265; GO:0006303; GO:0006310; GO:0006357; GO:0006914; GO:…
sp|O00560|SDCB1_HUMAN	SDCB1_HUMAN	14010000	9375600	1132000	11711000	20346000	28266000	63805000	67445000	1965500	11968000	27107000	16493000	12	2.2802e+07	2.16798e+07	O00560	Syntenin-1 (Melanoma differentiation-associated protein 9) (MDA-9) (Pro-TGF-alpha cytoplasmic domain-interacting protein 18) (TACIP18) (Scaffold protein Pbp1) (Syndecan-binding protein 1)	actin cytoskeleton organization [GO:0030036]; chemical synaptic transmission [GO:0007268]; intracellular signal transduction [GO:0035556]; negative regulation of proteasomal ubiquitin-dependent protein catabolic process [GO:0032435]; negative regulation of receptor internalization [GO:0002091]; negative regulation of transcription by RNA polymerase II [GO:0000122]; positive regulation of cell gro…	adherens junction [GO:0005912]; azurophil granule lumen [GO:0035578]; blood microparticle [GO:0072562]; cytoplasm [GO:0005737]; cytoskeleton [GO:0005856]; cytosol [GO:0005829]; endoplasmic reticulum membrane [GO:0005789]; extracellular exosome [GO:0070062]; extracellular region [GO:0005576]; extracellular space [GO:0005615]; extracellular vesicle [GO:1903561]; focal adhesion [GO:0005925]; interle…	adherens junction [GO:0005912]; azurophil granule lumen [GO:0035578]; blood microparticle [GO:0072562]; cytoplasm [GO:0005737]; cytoskeleton [GO:0005856]; cytosol [GO:0005829]; endoplasmic reticulum membrane [GO:0005789]; extracellular exosome [GO:0070062]; extracellular region [GO:0005576]; extracellular space [GO:0005615]; extracellular vesicle [GO:1903561]; focal adhesion [GO:0005925]; interle…	cell adhesion molecule binding [GO:0050839]; cytoskeletal anchor activity [GO:0008093]; ephrin receptor binding [GO:0046875]; frizzled binding [GO:0005109]; growth factor binding [GO:0019838]; identical protein binding [GO:0042802]; interleukin-5 receptor binding [GO:0005137]; ionotropic glutamate receptor binding [GO:0035255]; neurexin family protein binding [GO:0042043]; phosphatidylinositol-4,…	GO:0000122; GO:0002091; GO:0005109; GO:0005137; GO:0005546; GO:0005576; GO:0005615; GO:0005634; GO:0005654; GO:0005737; GO:0005739; GO:0005789; GO:0005829; GO:0005856; GO:0005886; GO:0005895; GO:0005912; GO:0005925; GO:0006508; GO:0006612; GO:0006930; GO:0007265; GO:0007268; GO:0007346; GO:0008093; GO:0008284; GO:0010718; GO:0010862; GO:0014069; GO:0016020; GO:0019838; GO:0030036; GO:0030307; GO:…
sp|O14979|HNRDL_HUMAN	HNRDL_HUMAN	23465000	23061000	8308800	26823000	17947000	31209000	25478000	21952000	11768000	33988000	27441000	14767000	12	2.2184e+07	7.72972e+06	O14979	Heterogeneous nuclear ribonucleoprotein D-like (hnRNP D-like) (hnRNP DL) (AU-rich element RNA-binding factor) (JKT41-binding protein) (Protein laAUF1)	regulation of gene expression [GO:0010468]; RNA processing [GO:0006396]	cytosol [GO:0005829]; nucleoplasm [GO:0005654]; nucleus [GO:0005634]; spliceosomal complex [GO:0005681]	cytosol [GO:0005829]; nucleoplasm [GO:0005654]; nucleus [GO:0005634]; spliceosomal complex [GO:0005681]; DNA binding [GO:0003677]; double-stranded DNA binding [GO:0003690]; poly(A) binding [GO:0008143]; poly(G) binding [GO:0034046]; RNA binding [GO:0003723]; single-stranded DNA binding [GO:0003697]; regulation of gene expression [GO:0010468]; RNA processing [GO:0006396]	DNA binding [GO:0003677]; double-stranded DNA binding [GO:0003690]; poly(A) binding [GO:0008143]; poly(G) binding [GO:0034046]; RNA binding [GO:0003723]; single-stranded DNA binding [GO:0003697]	GO:0003677; GO:0003690; GO:0003697; GO:0003723; GO:0005634; GO:0005654; GO:0005681; GO:0005829; GO:0006396; GO:0008143; GO:0010468; GO:0034046
sp|Q9BUF5|TBB6_HUMAN	TBB6_HUMAN	15503000	11511000	0	15584000	19609000	27778000	38255000	45461000	65029	41611000	29307000	11107000	11	2.13159e+07	1.52653e+07	Q9BUF5	Tubulin beta-6 chain (Tubulin beta class V)	microtubule cytoskeleton organization [GO:0000226]; mitotic cell cycle [GO:0000278]	cytoplasm [GO:0005737]; extracellular exosome [GO:0070062]; intercellular bridge [GO:0045171]; microtubule [GO:0005874]; microtubule cytoskeleton [GO:0015630]; mitotic spindle [GO:0072686]; nucleus [GO:0005634]	cytoplasm [GO:0005737]; extracellular exosome [GO:0070062]; intercellular bridge [GO:0045171]; microtubule [GO:0005874]; microtubule cytoskeleton [GO:0015630]; mitotic spindle [GO:0072686]; nucleus [GO:0005634]; GTP binding [GO:0005525]; GTPase activity [GO:0003924]; metal ion binding [GO:0046872]; structural constituent of cytoskeleton [GO:0005200]; microtubule cytoskeleton organization [GO:0000…	GTP binding [GO:0005525]; GTPase activity [GO:0003924]; metal ion binding [GO:0046872]; structural constituent of cytoskeleton [GO:0005200]	GO:0000226; GO:0000278; GO:0003924; GO:0005200; GO:0005525; GO:0005634; GO:0005737; GO:0005874; GO:0015630; GO:0045171; GO:0046872; GO:0070062; GO:0072686
sp|P30101|PDIA3_HUMAN	PDIA3_HUMAN	14763000	15249000	1226100	20813000	16202000	30206000	32341000	16852000	2262700	46609000	33240000	22425000	12	2.10157e+07	1.30571e+07	P30101	Protein disulfide-isomerase A3 (EC 5.3.4.1) (58 kDa glucose-regulated protein) (58 kDa microsomal protein) (p58) (Disulfide isomerase ER-60) (Endoplasmic reticulum resident protein 57) (ER protein 57) (ERp57) (Endoplasmic reticulum resident protein 60) (ER protein 60) (ERp60)	cellular response to interleukin-7 [GO:0098761]; extrinsic apoptotic signaling pathway [GO:0097191]; peptide antigen assembly with MHC class I protein complex [GO:0002502]; platelet aggregation [GO:0070527]; positive regulation of extrinsic apoptotic signaling pathway [GO:2001238]; protein folding [GO:0006457]; protein folding in endoplasmic reticulum [GO:0034975]; response to endoplasmic reticul…	cell surface [GO:0009986]; endoplasmic reticulum [GO:0005783]; endoplasmic reticulum lumen [GO:0005788]; extracellular exosome [GO:0070062]; extracellular space [GO:0005615]; focal adhesion [GO:0005925]; melanosome [GO:0042470]; MHC class I peptide loading complex [GO:0042824]; nucleus [GO:0005634]; phagocytic vesicle [GO:0045335]; recycling endosome membrane [GO:0055038]; Tapasin-ERp57 complex […	cell surface [GO:0009986]; endoplasmic reticulum [GO:0005783]; endoplasmic reticulum lumen [GO:0005788]; extracellular exosome [GO:0070062]; extracellular space [GO:0005615]; focal adhesion [GO:0005925]; melanosome [GO:0042470]; MHC class I peptide loading complex [GO:0042824]; nucleus [GO:0005634]; phagocytic vesicle [GO:0045335]; recycling endosome membrane [GO:0055038]; Tapasin-ERp57 complex […	cysteine-type endopeptidase activity [GO:0004197]; disulfide oxidoreductase activity [GO:0015036]; identical protein binding [GO:0042802]; phospholipase C activity [GO:0004629]; protein disulfide isomerase activity [GO:0003756]; protein-disulfide reductase activity [GO:0015035]; RNA binding [GO:0003723]	GO:0002502; GO:0003723; GO:0003756; GO:0004197; GO:0004629; GO:0005615; GO:0005634; GO:0005783; GO:0005788; GO:0005925; GO:0006457; GO:0009986; GO:0015035; GO:0015036; GO:0034975; GO:0034976; GO:0042470; GO:0042802; GO:0042824; GO:0045335; GO:0055038; GO:0061779; GO:0070062; GO:0070527; GO:0097191; GO:0098761; GO:2001238
sp|P84098|RL19_HUMAN	RL19_HUMAN	12413000	8298600	2709900	11080000	26412000	23177000	34471000	56537000	12866000	20864000	22840000	15488000	12	20596375	1.4284e+07	P84098	60S ribosomal protein L19 (Large ribosomal subunit protein eL19)	cytoplasmic translation [GO:0002181]; translation [GO:0006412]	cytoplasm [GO:0005737]; cytosol [GO:0005829]; cytosolic large ribosomal subunit [GO:0022625]; cytosolic ribosome [GO:0022626]; focal adhesion [GO:0005925]; membrane [GO:0016020]; nucleolus [GO:0005730]; polysomal ribosome [GO:0042788]; synapse [GO:0045202]	cytoplasm [GO:0005737]; cytosol [GO:0005829]; cytosolic large ribosomal subunit [GO:0022625]; cytosolic ribosome [GO:0022626]; focal adhesion [GO:0005925]; membrane [GO:0016020]; nucleolus [GO:0005730]; polysomal ribosome [GO:0042788]; synapse [GO:0045202]; RNA binding [GO:0003723]; structural constituent of ribosome [GO:0003735]; cytoplasmic translation [GO:0002181]; translation [GO:0006412]	RNA binding [GO:0003723]; structural constituent of ribosome [GO:0003735]	GO:0002181; GO:0003723; GO:0003735; GO:0005730; GO:0005737; GO:0005829; GO:0005925; GO:0006412; GO:0016020; GO:0022625; GO:0022626; GO:0042788; GO:0045202
sp|Q9BVA1|TBB2B_HUMAN	TBB2B_HUMAN	27055000	24803000	54521	18414000	11204000	13437000	22596000	16404000	50178	36444000	46178000	28749000	12	2.04491e+07	1.36219e+07	Q9BVA1	Tubulin beta-2B chain	cerebral cortex development [GO:0021987]; embryonic brain development [GO:1990403]; microtubule cytoskeleton organization [GO:0000226]; microtubule-based process [GO:0007017]; mitotic cell cycle [GO:0000278]; modulation of chemical synaptic transmission [GO:0050804]; neuron migration [GO:0001764]; positive regulation of axon guidance [GO:1902669]	cytoplasm [GO:0005737]; intercellular bridge [GO:0045171]; microtubule [GO:0005874]; microtubule cytoskeleton [GO:0015630]; mitotic spindle [GO:0072686]; nucleus [GO:0005634]; Schaffer collateral - CA1 synapse [GO:0098685]	cytoplasm [GO:0005737]; intercellular bridge [GO:0045171]; microtubule [GO:0005874]; microtubule cytoskeleton [GO:0015630]; mitotic spindle [GO:0072686]; nucleus [GO:0005634]; Schaffer collateral - CA1 synapse [GO:0098685]; GTP binding [GO:0005525]; GTPase activity [GO:0003924]; metal ion binding [GO:0046872]; protein heterodimerization activity [GO:0046982]; structural constituent of cytoskeleto…	GTP binding [GO:0005525]; GTPase activity [GO:0003924]; metal ion binding [GO:0046872]; protein heterodimerization activity [GO:0046982]; structural constituent of cytoskeleton [GO:0005200]	GO:0000226; GO:0000278; GO:0001764; GO:0003924; GO:0005200; GO:0005525; GO:0005634; GO:0005737; GO:0005874; GO:0007017; GO:0015630; GO:0021987; GO:0045171; GO:0046872; GO:0046982; GO:0050804; GO:0072686; GO:0098685; GO:1902669; GO:1990403
sp|P84090|ERH_HUMAN	ERH_HUMAN	8802800	9568800	1392300	29440000	7111400	25436000	27893000	38825000	2432400	36853000	44403000	11134000	12	2.02743e+07	1.52188e+07	P84090	Enhancer of rudimentary homolog	cell cycle [GO:0007049]; nucleobase-containing compound metabolic process [GO:0006139]; pyrimidine nucleoside metabolic process [GO:0006213]	methylosome [GO:0034709]; midbody [GO:0030496]; nucleus [GO:0005634]	methylosome [GO:0034709]; midbody [GO:0030496]; nucleus [GO:0005634]; methyl-CpG binding [GO:0008327]; RNA binding [GO:0003723]; cell cycle [GO:0007049]; nucleobase-containing compound metabolic process [GO:0006139]; pyrimidine nucleoside metabolic process [GO:0006213]	methyl-CpG binding [GO:0008327]; RNA binding [GO:0003723]	GO:0003723; GO:0005634; GO:0006139; GO:0006213; GO:0007049; GO:0008327; GO:0030496; GO:0034709
sp|Q01469|FABP5_HUMAN	FABP5_HUMAN	13206000	11629000	1926000	22129000	10993000	36054000	17393000	65120000	2843900	27383000	23281000	9400900	12	2.01132e+07	1.73223e+07	Q01469	Fatty acid-binding protein 5 (Epidermal-type fatty acid-binding protein) (E-FABP) (Fatty acid-binding protein, epidermal) (Psoriasis-associated fatty acid-binding protein homolog) (PA-FABP)	epidermis development [GO:0008544]; fatty acid transport [GO:0015908]; glucose homeostasis [GO:0042593]; glucose metabolic process [GO:0006006]; lipid metabolic process [GO:0006629]; lipid transport across blood-brain barrier [GO:1990379]; long-chain fatty acid transport [GO:0015909]; negative regulation of glucose transmembrane transport [GO:0010829]; phosphatidylcholine biosynthetic process [GO…	azurophil granule lumen [GO:0035578]; cytoplasm [GO:0005737]; cytosol [GO:0005829]; extracellular exosome [GO:0070062]; extracellular region [GO:0005576]; nucleoplasm [GO:0005654]; nucleus [GO:0005634]; plasma membrane [GO:0005886]; postsynaptic density [GO:0014069]; secretory granule membrane [GO:0030667]; synapse [GO:0045202]	azurophil granule lumen [GO:0035578]; cytoplasm [GO:0005737]; cytosol [GO:0005829]; extracellular exosome [GO:0070062]; extracellular region [GO:0005576]; nucleoplasm [GO:0005654]; nucleus [GO:0005634]; plasma membrane [GO:0005886]; postsynaptic density [GO:0014069]; secretory granule membrane [GO:0030667]; synapse [GO:0045202]; fatty acid binding [GO:0005504]; identical protein binding [GO:00428…	fatty acid binding [GO:0005504]; identical protein binding [GO:0042802]; lipid binding [GO:0008289]; long-chain fatty acid transporter activity [GO:0005324]; retinoic acid binding [GO:0001972]	GO:0001972; GO:0005324; GO:0005504; GO:0005576; GO:0005634; GO:0005654; GO:0005737; GO:0005829; GO:0005886; GO:0006006; GO:0006629; GO:0006656; GO:0008289; GO:0008544; GO:0010829; GO:0014069; GO:0015908; GO:0015909; GO:0030667; GO:0031392; GO:0035360; GO:0035578; GO:0042593; GO:0042802; GO:0045202; GO:0051930; GO:0070062; GO:0099178; GO:0120162; GO:1990379
sp|P29034|S10A2_HUMAN	S10A2_HUMAN	14620000	8270600	408670	15040000	24744000	25518000	6224700	20635000	0	44212000	59867000	20878000	11	2.00348e+07	1.75665e+07	P29034	Protein S100-A2 (CAN19) (Protein S-100L) (S100 calcium-binding protein A2)	endothelial cell migration [GO:0043542]		calcium ion binding [GO:0005509]; identical protein binding [GO:0042802]; transition metal ion binding [GO:0046914]; endothelial cell migration [GO:0043542]	calcium ion binding [GO:0005509]; identical protein binding [GO:0042802]; transition metal ion binding [GO:0046914]	GO:0005509; GO:0042802; GO:0043542; GO:0046914
sp|P60953|CDC42_HUMAN	CDC42_HUMAN	12153000	13297000	863330	22260000	11813000	18092000	41892000	61148000	1602300	12845000	20572000	18674000	12	1.9601e+07	1.68165e+07	P60953	Cell division control protein 42 homolog (EC 3.6.5.2) (G25K GTP-binding protein)	actin cytoskeleton organization [GO:0030036]; actin filament organization [GO:0007015]; adherens junction organization [GO:0034332]; cardiac conduction system development [GO:0003161]; cardiac neural crest cell migration involved in outflow tract morphogenesis [GO:0003253]; Cdc42 protein signal transduction [GO:0032488]; cell junction assembly [GO:0034329]; cellular response to type II interferon…	apical part of cell [GO:0045177]; cell-cell junction [GO:0005911]; cytoplasm [GO:0005737]; cytoplasmic ribonucleoprotein granule [GO:0036464]; cytosol [GO:0005829]; dendritic spine [GO:0043197]; endoplasmic reticulum membrane [GO:0005789]; extracellular exosome [GO:0070062]; filopodium [GO:0030175]; focal adhesion [GO:0005925]; glutamatergic synapse [GO:0098978]; Golgi membrane [GO:0000139]; Golg…	apical part of cell [GO:0045177]; cell-cell junction [GO:0005911]; cytoplasm [GO:0005737]; cytoplasmic ribonucleoprotein granule [GO:0036464]; cytosol [GO:0005829]; dendritic spine [GO:0043197]; endoplasmic reticulum membrane [GO:0005789]; extracellular exosome [GO:0070062]; filopodium [GO:0030175]; focal adhesion [GO:0005925]; glutamatergic synapse [GO:0098978]; Golgi membrane [GO:0000139]; Golg…	apolipoprotein A-I receptor binding [GO:0034191]; G protein activity [GO:0003925]; GBD domain binding [GO:0032427]; GTP binding [GO:0005525]; GTP-dependent protein binding [GO:0030742]; GTPase activity [GO:0003924]; identical protein binding [GO:0042802]; protein kinase binding [GO:0019901]; thioesterase binding [GO:0031996]; ubiquitin protein ligase activity [GO:0061630]	GO:0000139; GO:0000322; GO:0003161; GO:0003253; GO:0003924; GO:0003925; GO:0005525; GO:0005737; GO:0005789; GO:0005815; GO:0005829; GO:0005886; GO:0005911; GO:0005925; GO:0006468; GO:0006897; GO:0006911; GO:0007015; GO:0007030; GO:0007088; GO:0007097; GO:0007163; GO:0007229; GO:0008104; GO:0010591; GO:0010592; GO:0016020; GO:0017119; GO:0019901; GO:0021762; GO:0030036; GO:0030175; GO:0030225; GO:…
sp|P49773|HINT1_HUMAN	HINT1_HUMAN	8762500	8685000	1991100	29392000	10060000	23379000	24975000	52788000	7496500	44985000	11450000	10795000	12	1.95633e+07	1.59915e+07	P49773	Histidine triad nucleotide-binding protein 1 (EC 3.-.-.-) (Adenosine 5'-monophosphoramidase) (Protein kinase C inhibitor 1) (Protein kinase C-interacting protein 1) (PKCI-1)	intrinsic apoptotic signaling pathway by p53 class mediator [GO:0072332]; positive regulation of calcium-mediated signaling [GO:0050850]; protein desumoylation [GO:0016926]; purine ribonucleotide catabolic process [GO:0009154]; regulation of DNA-templated transcription [GO:0006355]; signal transduction [GO:0007165]	cytoplasm [GO:0005737]; cytoskeleton [GO:0005856]; cytosol [GO:0005829]; extracellular exosome [GO:0070062]; histone deacetylase complex [GO:0000118]; nucleoplasm [GO:0005654]; nucleus [GO:0005634]; plasma membrane [GO:0005886]	cytoplasm [GO:0005737]; cytoskeleton [GO:0005856]; cytosol [GO:0005829]; extracellular exosome [GO:0070062]; histone deacetylase complex [GO:0000118]; nucleoplasm [GO:0005654]; nucleus [GO:0005634]; plasma membrane [GO:0005886]; adenosine 5'-monophosphoramidase activity [GO:0043530]; deSUMOylase activity [GO:0016929]; hydrolase activity [GO:0016787]; nucleotide binding [GO:0000166]; protein kinas…	adenosine 5'-monophosphoramidase activity [GO:0043530]; deSUMOylase activity [GO:0016929]; hydrolase activity [GO:0016787]; nucleotide binding [GO:0000166]; protein kinase C binding [GO:0005080]	GO:0000118; GO:0000166; GO:0005080; GO:0005634; GO:0005654; GO:0005737; GO:0005829; GO:0005856; GO:0005886; GO:0006355; GO:0007165; GO:0009154; GO:0016787; GO:0016926; GO:0016929; GO:0043530; GO:0050850; GO:0070062; GO:0072332
sp|Q14764|MVP_HUMAN	MVP_HUMAN	9655100	5152000	734400	7575300	13346000	11373000	64464000	83287000	2383700	8218400	16457000	10007000	12	1.93877e+07	2.61309e+07	Q14764	Major vault protein (MVP) (Lung resistance-related protein)	ERBB signaling pathway [GO:0038127]; mRNA transport [GO:0051028]; negative regulation of epidermal growth factor receptor signaling pathway [GO:0042059]; negative regulation of protein autophosphorylation [GO:0031953]; negative regulation of protein tyrosine kinase activity [GO:0061099]; protein transport [GO:0015031]	cytoplasm [GO:0005737]; cytoskeleton [GO:0005856]; cytosol [GO:0005829]; extracellular exosome [GO:0070062]; extracellular region [GO:0005576]; ficolin-1-rich granule lumen [GO:1904813]; membrane [GO:0016020]; nuclear pore [GO:0005643]; nucleus [GO:0005634]; perinuclear region of cytoplasm [GO:0048471]; ribonucleoprotein complex [GO:1990904]; secretory granule lumen [GO:0034774]	cytoplasm [GO:0005737]; cytoskeleton [GO:0005856]; cytosol [GO:0005829]; extracellular exosome [GO:0070062]; extracellular region [GO:0005576]; ficolin-1-rich granule lumen [GO:1904813]; membrane [GO:0016020]; nuclear pore [GO:0005643]; nucleus [GO:0005634]; perinuclear region of cytoplasm [GO:0048471]; ribonucleoprotein complex [GO:1990904]; secretory granule lumen [GO:0034774]; identical protei…	identical protein binding [GO:0042802]; protein kinase binding [GO:0019901]; protein phosphatase binding [GO:0019903]	GO:0005576; GO:0005634; GO:0005643; GO:0005737; GO:0005829; GO:0005856; GO:0015031; GO:0016020; GO:0019901; GO:0019903; GO:0031953; GO:0034774; GO:0038127; GO:0042059; GO:0042802; GO:0048471; GO:0051028; GO:0061099; GO:0070062; GO:1904813; GO:1990904
sp|P52565|GDIR1_HUMAN	GDIR1_HUMAN	36077000	21138000	6326500	24879000	2382100	6294700	14314000	33259000	5302200	18884000	43714000	19790000	12	19363375	1.33202e+07	P52565	Rho GDP-dissociation inhibitor 1 (Rho GDI 1) (Rho-GDI alpha)	negative regulation of apoptotic process [GO:0043066]; regulation of protein localization [GO:0032880]; regulation of Rho protein signal transduction [GO:0035023]; regulation of synaptic vesicle cycle [GO:0098693]; Rho protein signal transduction [GO:0007266]; semaphorin-plexin signaling pathway [GO:0071526]	cytoskeleton [GO:0005856]; cytosol [GO:0005829]; extracellular exosome [GO:0070062]; immunological synapse [GO:0001772]; membrane [GO:0016020]; nucleus [GO:0005634]; Schaffer collateral - CA1 synapse [GO:0098685]	cytoskeleton [GO:0005856]; cytosol [GO:0005829]; extracellular exosome [GO:0070062]; immunological synapse [GO:0001772]; membrane [GO:0016020]; nucleus [GO:0005634]; Schaffer collateral - CA1 synapse [GO:0098685]; GTPase activator activity [GO:0005096]; Rho GDP-dissociation inhibitor activity [GO:0005094]; negative regulation of apoptotic process [GO:0043066]; regulation of protein localization […	GTPase activator activity [GO:0005096]; Rho GDP-dissociation inhibitor activity [GO:0005094]	GO:0001772; GO:0005094; GO:0005096; GO:0005634; GO:0005829; GO:0005856; GO:0007266; GO:0016020; GO:0032880; GO:0035023; GO:0043066; GO:0070062; GO:0071526; GO:0098685; GO:0098693
sp|P06576|ATPB_HUMAN	ATPB_HUMAN	24991000	18272000	3725300	14079000	11692000	21267000	32822000	13983000	2801500	29549000	33774000	22447000	12	19116900	1.03238e+07	P06576	ATP synthase subunit beta, mitochondrial (EC 7.1.2.2) (ATP synthase F1 subunit beta)	angiogenesis [GO:0001525]; ATP biosynthetic process [GO:0006754]; cellular response to interleukin-7 [GO:0098761]; generation of precursor metabolites and energy [GO:0006091]; lipid metabolic process [GO:0006629]; negative regulation of cell adhesion involved in substrate-bound cell migration [GO:0006933]; osteoblast differentiation [GO:0001649]; positive regulation of blood vessel endothelial ce…	cell surface [GO:0009986]; extracellular exosome [GO:0070062]; membrane [GO:0016020]; mitochondrial inner membrane [GO:0005743]; mitochondrial matrix [GO:0005759]; mitochondrial membrane [GO:0031966]; mitochondrial nucleoid [GO:0042645]; mitochondrial proton-transporting ATP synthase complex [GO:0005753]; mitochondrial proton-transporting ATP synthase, catalytic core [GO:0005754]; mitochondrion […	cell surface [GO:0009986]; extracellular exosome [GO:0070062]; membrane [GO:0016020]; mitochondrial inner membrane [GO:0005743]; mitochondrial matrix [GO:0005759]; mitochondrial membrane [GO:0031966]; mitochondrial nucleoid [GO:0042645]; mitochondrial proton-transporting ATP synthase complex [GO:0005753]; mitochondrial proton-transporting ATP synthase, catalytic core [GO:0005754]; mitochondrion […	angiostatin binding [GO:0043532]; ATP binding [GO:0005524]; MHC class I protein binding [GO:0042288]; proton-transporting ATP synthase activity, rotational mechanism [GO:0046933]; proton-transporting ATPase activity, rotational mechanism [GO:0046961]	GO:0001525; GO:0001649; GO:0005524; GO:0005634; GO:0005739; GO:0005743; GO:0005753; GO:0005754; GO:0005759; GO:0005886; GO:0006091; GO:0006629; GO:0006754; GO:0006933; GO:0009986; GO:0015986; GO:0016020; GO:0031966; GO:0042288; GO:0042645; GO:0042776; GO:0043532; GO:0043536; GO:0045259; GO:0045261; GO:0046933; GO:0046961; GO:0051453; GO:0070062; GO:0098761; GO:1902600
sp|Q15758|AAAT_HUMAN	AAAT_HUMAN	9333200	14688000	1743000	12841000	14943000	25513000	41933000	48936000	2767000	21512000	13071000	15635000	12	1.85763e+07	1.42793e+07	Q15758	Neutral amino acid transporter B(0) (ATB(0)) (Baboon M7 virus receptor) (RD114/simian type D retrovirus receptor) (Sodium-dependent neutral amino acid transporter type 2) (Solute carrier family 1 member 5)	amino acid transport [GO:0006865]; erythrocyte differentiation [GO:0030218]; glutamine secretion [GO:0010585]; glutamine transport [GO:0006868]; L-aspartate import across plasma membrane [GO:0140009]; L-glutamine import across plasma membrane [GO:1903803]; neutral amino acid transport [GO:0015804]; protein homotrimerization [GO:0070207]; transport across blood-brain barrier [GO:0150104]	basal plasma membrane [GO:0009925]; extracellular exosome [GO:0070062]; melanosome [GO:0042470]; membrane [GO:0016020]; plasma membrane [GO:0005886]	basal plasma membrane [GO:0009925]; extracellular exosome [GO:0070062]; melanosome [GO:0042470]; membrane [GO:0016020]; plasma membrane [GO:0005886]; amino acid transmembrane transporter activity [GO:0015171]; antiporter activity [GO:0015297]; L-aspartate transmembrane transporter activity [GO:0015183]; L-glutamine transmembrane transporter activity [GO:0015186]; L-serine transmembrane transporte…	amino acid transmembrane transporter activity [GO:0015171]; antiporter activity [GO:0015297]; L-aspartate transmembrane transporter activity [GO:0015183]; L-glutamine transmembrane transporter activity [GO:0015186]; L-serine transmembrane transporter activity [GO:0015194]; ligand-gated channel activity [GO:0022834]; metal ion binding [GO:0046872]; neutral L-amino acid transmembrane transporter ac…	GO:0001618; GO:0005886; GO:0006865; GO:0006868; GO:0009925; GO:0010585; GO:0015171; GO:0015175; GO:0015183; GO:0015186; GO:0015194; GO:0015293; GO:0015297; GO:0015804; GO:0016020; GO:0022834; GO:0030218; GO:0038023; GO:0042470; GO:0046872; GO:0070062; GO:0070207; GO:0140009; GO:0150104; GO:1903803
sp|P84103|SRSF3_HUMAN	SRSF3_HUMAN	11148000	11029000	12116000	11923000	5679600	24901000	30841000	30993000	16253000	28392000	19462000	20017000	12	1.85629e+07	8.60059e+06	P84103	Serine/arginine-rich splicing factor 3 (Pre-mRNA-splicing factor SRP20) (Splicing factor, arginine/serine-rich 3)	cellular response to leukemia inhibitory factor [GO:1990830]; mRNA export from nucleus [GO:0006406]; mRNA splicing, via spliceosome [GO:0000398]; primary miRNA processing [GO:0031053]; regulation of mRNA splicing, via spliceosome [GO:0048024]	cytoplasm [GO:0005737]; nuclear speck [GO:0016607]; nucleoplasm [GO:0005654]	cytoplasm [GO:0005737]; nuclear speck [GO:0016607]; nucleoplasm [GO:0005654]; phospholipase binding [GO:0043274]; primary miRNA binding [GO:0070878]; RNA binding [GO:0003723]; cellular response to leukemia inhibitory factor [GO:1990830]; mRNA export from nucleus [GO:0006406]; mRNA splicing, via spliceosome [GO:0000398]; primary miRNA processing [GO:0031053]; regulation of mRNA splicing, via splic…	phospholipase binding [GO:0043274]; primary miRNA binding [GO:0070878]; RNA binding [GO:0003723]	GO:0000398; GO:0003723; GO:0005654; GO:0005737; GO:0006406; GO:0016607; GO:0031053; GO:0043274; GO:0048024; GO:0070878; GO:1990830
sp|P31946|1433B_HUMAN	1433B_HUMAN	13424000	7752900	7281500	17243000	10508000	18560000	27827000	37848000	11715000	30095000	27635000	10786000	12	1.83896e+07	1.00779e+07	P31946	14-3-3 protein beta/alpha (Protein 1054) (Protein kinase C inhibitor protein 1) (KCIP-1) [Cleaved into: 14-3-3 protein beta/alpha, N-terminally processed]	cytoplasmic sequestering of protein [GO:0051220]; negative regulation of G protein-coupled receptor signaling pathway [GO:0045744]; negative regulation of protein dephosphorylation [GO:0035308]; positive regulation of catalytic activity [GO:0043085]; protein targeting [GO:0006605]; signal transduction [GO:0007165]	cytoplasm [GO:0005737]; cytosol [GO:0005829]; extracellular exosome [GO:0070062]; focal adhesion [GO:0005925]; melanosome [GO:0042470]; membrane [GO:0016020]; perinuclear region of cytoplasm [GO:0048471]; vacuolar membrane [GO:0005774]	cytoplasm [GO:0005737]; cytosol [GO:0005829]; extracellular exosome [GO:0070062]; focal adhesion [GO:0005925]; melanosome [GO:0042470]; membrane [GO:0016020]; perinuclear region of cytoplasm [GO:0048471]; vacuolar membrane [GO:0005774]; cadherin binding [GO:0045296]; enzyme binding [GO:0019899]; histone deacetylase binding [GO:0042826]; identical protein binding [GO:0042802]; phosphoprotein bindi…	cadherin binding [GO:0045296]; enzyme binding [GO:0019899]; histone deacetylase binding [GO:0042826]; identical protein binding [GO:0042802]; phosphoprotein binding [GO:0051219]; phosphoserine residue binding [GO:0050815]; protein domain specific binding [GO:0019904]; protein kinase inhibitor activity [GO:0004860]	GO:0004860; GO:0005737; GO:0005774; GO:0005829; GO:0005925; GO:0006605; GO:0007165; GO:0016020; GO:0019899; GO:0019904; GO:0035308; GO:0042470; GO:0042802; GO:0042826; GO:0043085; GO:0045296; GO:0045744; GO:0048471; GO:0050815; GO:0051219; GO:0051220; GO:0070062
sp|P62308|RUXG_HUMAN	RUXG_HUMAN	34076000	31928000	27652000	14093000	5133600	6071400	14334000	15074000	32748000	14572000	4575000	19923000	12	1.83483e+07	1.08812e+07	P62308	Small nuclear ribonucleoprotein G (snRNP-G) (Sm protein G) (Sm-G) (SmG)	7-methylguanosine cap hypermethylation [GO:0036261]; mRNA splicing, via spliceosome [GO:0000398]; RNA splicing [GO:0008380]; spliceosomal complex assembly [GO:0000245]; spliceosomal snRNP assembly [GO:0000387]; U2-type prespliceosome assembly [GO:1903241]	catalytic step 2 spliceosome [GO:0071013]; cytosol [GO:0005829]; methylosome [GO:0034709]; nucleoplasm [GO:0005654]; nucleus [GO:0005634]; P granule [GO:0043186]; precatalytic spliceosome [GO:0071011]; small nuclear ribonucleoprotein complex [GO:0030532]; SMN-Sm protein complex [GO:0034719]; spliceosomal complex [GO:0005681]; spliceosomal tri-snRNP complex [GO:0097526]; U1 snRNP [GO:0005685]; U12…	catalytic step 2 spliceosome [GO:0071013]; cytosol [GO:0005829]; methylosome [GO:0034709]; nucleoplasm [GO:0005654]; nucleus [GO:0005634]; P granule [GO:0043186]; precatalytic spliceosome [GO:0071011]; small nuclear ribonucleoprotein complex [GO:0030532]; SMN-Sm protein complex [GO:0034719]; spliceosomal complex [GO:0005681]; spliceosomal tri-snRNP complex [GO:0097526]; U1 snRNP [GO:0005685]; U12…	RNA binding [GO:0003723]	GO:0000245; GO:0000387; GO:0000398; GO:0003723; GO:0005634; GO:0005654; GO:0005681; GO:0005682; GO:0005683; GO:0005685; GO:0005686; GO:0005687; GO:0005689; GO:0005829; GO:0008380; GO:0030532; GO:0034709; GO:0034719; GO:0036261; GO:0043186; GO:0046540; GO:0071004; GO:0071005; GO:0071007; GO:0071011; GO:0071013; GO:0097526; GO:1903241
sp|Q15056|IF4H_HUMAN	IF4H_HUMAN	22006000	14343000	18195000	18889000	8266300	18401000	27971000	10682000	35979000	22758000	15340000	7078500	12	1.83257e+07	8.25224e+06	Q15056	Eukaryotic translation initiation factor 4H (eIF-4H) (Williams-Beuren syndrome chromosomal region 1 protein)	developmental growth [GO:0048589]; regulation of translational initiation [GO:0006446]; sexual reproduction [GO:0019953]	cytosol [GO:0005829]; eukaryotic translation initiation factor 4F complex [GO:0016281]; membrane [GO:0016020]; perinuclear region of cytoplasm [GO:0048471]; polysome [GO:0005844]	cytosol [GO:0005829]; eukaryotic translation initiation factor 4F complex [GO:0016281]; membrane [GO:0016020]; perinuclear region of cytoplasm [GO:0048471]; polysome [GO:0005844]; cadherin binding [GO:0045296]; RNA binding [GO:0003723]; translation factor activity, RNA binding [GO:0008135]; translation initiation factor activity [GO:0003743]; developmental growth [GO:0048589]; regulation of trans…	cadherin binding [GO:0045296]; RNA binding [GO:0003723]; translation factor activity, RNA binding [GO:0008135]; translation initiation factor activity [GO:0003743]	GO:0003723; GO:0003743; GO:0005829; GO:0005844; GO:0006446; GO:0008135; GO:0016020; GO:0016281; GO:0019953; GO:0045296; GO:0048471; GO:0048589
sp|P63000|RAC1_HUMAN	RAC1_HUMAN	3462400	5429900	806290	15838000	16011000	22462000	43465000	58509000	480030	31797000	12287000	7782400	12	1.81942e+07	1.8133e+07	P63000	Ras-related C3 botulinum toxin substrate 1 (EC 3.6.5.2) (Cell migration-inducing gene 5 protein) (Ras-like protein TC25) (p21-Rac1)	actin cytoskeleton organization [GO:0030036]; actin filament organization [GO:0007015]; actin filament polymerization [GO:0030041]; anatomical structure morphogenesis [GO:0009653]; cell adhesion [GO:0007155]; cell migration [GO:0016477]; cell motility [GO:0048870]; cell-matrix adhesion [GO:0007160]; cortical cytoskeleton organization [GO:0030865]; engulfment of apoptotic cell [GO:0043652]; establ…	cell cortex [GO:0005938]; cytoplasm [GO:0005737]; cytoplasmic ribonucleoprotein granule [GO:0036464]; cytoplasmic vesicle [GO:0031410]; cytoskeleton [GO:0005856]; cytosol [GO:0005829]; dendritic spine [GO:0043197]; endoplasmic reticulum membrane [GO:0005789]; extracellular exosome [GO:0070062]; ficolin-1-rich granule membrane [GO:0101003]; focal adhesion [GO:0005925]; glutamatergic synapse [GO:00…	cell cortex [GO:0005938]; cytoplasm [GO:0005737]; cytoplasmic ribonucleoprotein granule [GO:0036464]; cytoplasmic vesicle [GO:0031410]; cytoskeleton [GO:0005856]; cytosol [GO:0005829]; dendritic spine [GO:0043197]; endoplasmic reticulum membrane [GO:0005789]; extracellular exosome [GO:0070062]; ficolin-1-rich granule membrane [GO:0101003]; focal adhesion [GO:0005925]; glutamatergic synapse [GO:00…	enzyme binding [GO:0019899]; G protein activity [GO:0003925]; GTP binding [GO:0005525]; GTPase activity [GO:0003924]; molecular adaptor activity [GO:0060090]; protein kinase binding [GO:0019901]; protein-containing complex binding [GO:0044877]; Rho GDP-dissociation inhibitor binding [GO:0051022]; thioesterase binding [GO:0031996]	GO:0001764; GO:0001934; GO:0003376; GO:0003924; GO:0003925; GO:0005525; GO:0005634; GO:0005737; GO:0005789; GO:0005802; GO:0005829; GO:0005856; GO:0005886; GO:0005925; GO:0005938; GO:0006954; GO:0007015; GO:0007155; GO:0007160; GO:0007163; GO:0007264; GO:0008045; GO:0008360; GO:0008361; GO:0009611; GO:0009653; GO:0010310; GO:0010591; GO:0010592; GO:0010595; GO:0010764; GO:0010811; GO:0016020; GO:…
sp|P50502|F10A1_HUMAN	F10A1_HUMAN	14966000	11828000	4296400	20733000	9262400	29420000	21971000	24926000	3923000	40733000	22926000	13334000	12	1.81932e+07	1.07602e+07	P50502	Hsc70-interacting protein (Hip) (Aging-associated protein 2) (Progesterone receptor-associated p48 protein) (Protein FAM10A1) (Putative tumor suppressor ST13) (Renal carcinoma antigen NY-REN-33) (Suppression of tumorigenicity 13 protein)	chaperone cofactor-dependent protein refolding [GO:0051085]; protein folding [GO:0006457]; response to bacterium [GO:0009617]	cytoplasm [GO:0005737]; cytosol [GO:0005829]; extracellular exosome [GO:0070062]	cytoplasm [GO:0005737]; cytosol [GO:0005829]; extracellular exosome [GO:0070062]; Hsp70 protein binding [GO:0030544]; protein dimerization activity [GO:0046983]; protein-macromolecule adaptor activity [GO:0030674]; chaperone cofactor-dependent protein refolding [GO:0051085]; protein folding [GO:0006457]; response to bacterium [GO:0009617]	Hsp70 protein binding [GO:0030544]; protein dimerization activity [GO:0046983]; protein-macromolecule adaptor activity [GO:0030674]	GO:0005737; GO:0005829; GO:0006457; GO:0009617; GO:0030544; GO:0030674; GO:0046983; GO:0051085; GO:0070062
sp|P06702|S10A9_HUMAN	S10A9_HUMAN	5701400	21498000	0	66759000	17037000	15196000	22266000	10984000	0	19327000	26862000	11582000	10	1.8101e+07	1.75461e+07	P06702	Protein S100-A9 (Calgranulin-B) (Calprotectin L1H subunit) (Leukocyte L1 complex heavy chain) (Migration inhibitory factor-related protein 14) (MRP-14) (p14) (S100 calcium-binding protein A9)	activation of cysteine-type endopeptidase activity involved in apoptotic process [GO:0006919]; antimicrobial humoral immune response mediated by antimicrobial peptide [GO:0061844]; apoptotic process [GO:0006915]; astrocyte development [GO:0014002]; autocrine signaling [GO:0035425]; autophagy [GO:0006914]; cell-cell signaling [GO:0007267]; chronic inflammatory response [GO:0002544]; defense respon…	collagen-containing extracellular matrix [GO:0062023]; cytoplasm [GO:0005737]; cytoskeleton [GO:0005856]; cytosol [GO:0005829]; extracellular exosome [GO:0070062]; extracellular region [GO:0005576]; extracellular space [GO:0005615]; nucleus [GO:0005634]; plasma membrane [GO:0005886]; secretory granule lumen [GO:0034774]	collagen-containing extracellular matrix [GO:0062023]; cytoplasm [GO:0005737]; cytoskeleton [GO:0005856]; cytosol [GO:0005829]; extracellular exosome [GO:0070062]; extracellular region [GO:0005576]; extracellular space [GO:0005615]; nucleus [GO:0005634]; plasma membrane [GO:0005886]; secretory granule lumen [GO:0034774]; antioxidant activity [GO:0016209]; arachidonic acid binding [GO:0050544]; ca…	antioxidant activity [GO:0016209]; arachidonic acid binding [GO:0050544]; calcium ion binding [GO:0005509]; microtubule binding [GO:0008017]; RAGE receptor binding [GO:0050786]; Toll-like receptor 4 binding [GO:0035662]; zinc ion binding [GO:0008270]	GO:0002523; GO:0002544; GO:0005509; GO:0005576; GO:0005615; GO:0005634; GO:0005737; GO:0005829; GO:0005856; GO:0005886; GO:0006914; GO:0006915; GO:0006919; GO:0006954; GO:0007267; GO:0008017; GO:0008270; GO:0010976; GO:0014002; GO:0016209; GO:0018119; GO:0030307; GO:0030593; GO:0032119; GO:0032496; GO:0034774; GO:0035425; GO:0035606; GO:0035662; GO:0035821; GO:0042742; GO:0043542; GO:0045087; GO:…
sp|Q969Q0|RL36L_HUMAN	RL36L_HUMAN	14700000	12922000	1810300	6291300	15889000	4201300	20931000	79534000	7211100	6606300	33072000	13366000	12	18044525	2.11501e+07	Q969Q0	60S ribosomal protein L36a-like (Large ribosomal subunit protein eL42-like)	translation [GO:0006412]	cytosol [GO:0005829]; cytosolic large ribosomal subunit [GO:0022625]; endoplasmic reticulum [GO:0005783]; nucleus [GO:0005634]; plasma membrane [GO:0005886]	cytosol [GO:0005829]; cytosolic large ribosomal subunit [GO:0022625]; endoplasmic reticulum [GO:0005783]; nucleus [GO:0005634]; plasma membrane [GO:0005886]; structural constituent of ribosome [GO:0003735]; translation [GO:0006412]	structural constituent of ribosome [GO:0003735]	GO:0003735; GO:0005634; GO:0005783; GO:0005829; GO:0005886; GO:0006412; GO:0022625
sp|Q15121|PEA15_HUMAN	PEA15_HUMAN	27265000	19798000	30502000	21455000	5347000	21444000	8765000	7335000	19066000	20810000	22506000	9480800	12	1.78145e+07	8.14526e+06	Q15121	Astrocytic phosphoprotein PEA-15 (15 kDa phosphoprotein enriched in astrocytes) (Phosphoprotein enriched in diabetes) (PED)	apoptotic process [GO:0006915]; carbohydrate transport [GO:0008643]; MAPK cascade [GO:0000165]; negative regulation of extrinsic apoptotic signaling pathway via death domain receptors [GO:1902042]; negative regulation of glucose import [GO:0046325]; positive regulation of extrinsic apoptotic signaling pathway via death domain receptors [GO:1902043]; response to morphine [GO:0043278]	cytosol [GO:0005829]; intracellular membrane-bounded organelle [GO:0043231]; microtubule associated complex [GO:0005875]; nucleoplasm [GO:0005654]	cytosol [GO:0005829]; intracellular membrane-bounded organelle [GO:0043231]; microtubule associated complex [GO:0005875]; nucleoplasm [GO:0005654]; apoptotic process [GO:0006915]; carbohydrate transport [GO:0008643]; MAPK cascade [GO:0000165]; negative regulation of extrinsic apoptotic signaling pathway via death domain receptors [GO:1902042]; negative regulation of glucose import [GO:0046325]; p…		GO:0000165; GO:0005654; GO:0005829; GO:0005875; GO:0006915; GO:0008643; GO:0043231; GO:0043278; GO:0046325; GO:1902042; GO:1902043
sp|P10909|CLUS_HUMAN	CLUS_HUMAN	21752000	12816000	1802400	26240000	6378300	21411000	13670000	11939000	1286800	44291000	39472000	11861000	12	1.77433e+07	1.36245e+07	P10909	Clusterin (Aging-associated gene 4 protein) (Apolipoprotein J) (Apo-J) (Complement cytolysis inhibitor) (CLI) (Complement-associated protein SP-40,40) (Ku70-binding protein 1) (NA1/NA2) (Sulfated glycoprotein 2) (SGP-2) (Testosterone-repressed prostate message 2) (TRPM-2) [Cleaved into: Clusterin beta chain (ApoJalpha) (Complement cytolysis inhibitor a chain); Clusterin alpha chain (ApoJbeta) (Co…	cell morphogenesis [GO:0000902]; central nervous system myelin maintenance [GO:0032286]; chaperone-mediated protein complex assembly [GO:0051131]; chaperone-mediated protein folding [GO:0061077]; complement activation [GO:0006956]; complement activation, classical pathway [GO:0006958]; immune complex clearance [GO:0002434]; innate immune response [GO:0045087]; intrinsic apoptotic signaling pathwa…	apical dendrite [GO:0097440]; blood microparticle [GO:0072562]; cell surface [GO:0009986]; chromaffin granule [GO:0042583]; collagen-containing extracellular matrix [GO:0062023]; cytoplasm [GO:0005737]; cytosol [GO:0005829]; extracellular exosome [GO:0070062]; extracellular region [GO:0005576]; extracellular space [GO:0005615]; Golgi apparatus [GO:0005794]; intracellular membrane-bounded organell…	apical dendrite [GO:0097440]; blood microparticle [GO:0072562]; cell surface [GO:0009986]; chromaffin granule [GO:0042583]; collagen-containing extracellular matrix [GO:0062023]; cytoplasm [GO:0005737]; cytosol [GO:0005829]; extracellular exosome [GO:0070062]; extracellular region [GO:0005576]; extracellular space [GO:0005615]; Golgi apparatus [GO:0005794]; intracellular membrane-bounded organell…	amyloid-beta binding [GO:0001540]; low-density lipoprotein particle receptor binding [GO:0050750]; misfolded protein binding [GO:0051787]; protein carrier chaperone [GO:0140597]; protein heterodimerization activity [GO:0046982]; protein-containing complex binding [GO:0044877]; protein-folding chaperone binding [GO:0051087]; signaling receptor binding [GO:0005102]; tau protein binding [GO:0048156]…	GO:0000902; GO:0001540; GO:0001774; GO:0001836; GO:0002434; GO:0005102; GO:0005576; GO:0005615; GO:0005634; GO:0005737; GO:0005739; GO:0005743; GO:0005794; GO:0005829; GO:0006629; GO:0006956; GO:0006958; GO:0009615; GO:0009986; GO:0010628; GO:0017038; GO:0031093; GO:0031333; GO:0031334; GO:0031625; GO:0032286; GO:0032436; GO:0032760; GO:0032991; GO:0034366; GO:0042127; GO:0042583; GO:0042981; GO:…
sp|P13987|CD59_HUMAN	CD59_HUMAN	8425600	11276000	2546500	13831000	10227000	42267000	44052000	33571000	833390	25801000	12505000	6287800	12	1.76353e+07	1.50299e+07	P13987	CD59 glycoprotein (1F5 antigen) (20 kDa homologous restriction factor) (HRF-20) (HRF20) (MAC-inhibitory protein) (MAC-IP) (MEM43 antigen) (Membrane attack complex inhibition factor) (MACIF) (Membrane inhibitor of reactive lysis) (MIRL) (Protectin) (CD antigen CD59)	blood coagulation [GO:0007596]; cell surface receptor signaling pathway [GO:0007166]; negative regulation of activation of membrane attack complex [GO:0001971]; regulation of complement activation [GO:0030449]; regulation of complement-dependent cytotoxicity [GO:1903659]	cell surface [GO:0009986]; endoplasmic reticulum membrane [GO:0005789]; endoplasmic reticulum-Golgi intermediate compartment membrane [GO:0033116]; ER to Golgi transport vesicle membrane [GO:0012507]; external side of plasma membrane [GO:0009897]; extracellular exosome [GO:0070062]; extracellular space [GO:0005615]; focal adhesion [GO:0005925]; Golgi membrane [GO:0000139]; membrane [GO:0016020]; …	cell surface [GO:0009986]; endoplasmic reticulum membrane [GO:0005789]; endoplasmic reticulum-Golgi intermediate compartment membrane [GO:0033116]; ER to Golgi transport vesicle membrane [GO:0012507]; external side of plasma membrane [GO:0009897]; extracellular exosome [GO:0070062]; extracellular space [GO:0005615]; focal adhesion [GO:0005925]; Golgi membrane [GO:0000139]; membrane [GO:0016020]; …	complement binding [GO:0001848]	GO:0000139; GO:0001848; GO:0001971; GO:0005615; GO:0005789; GO:0005886; GO:0005925; GO:0007166; GO:0007596; GO:0009897; GO:0009986; GO:0012507; GO:0016020; GO:0030133; GO:0030449; GO:0031982; GO:0033116; GO:0035579; GO:0070062; GO:0070821; GO:1903659
sp|P27348|1433T_HUMAN	1433T_HUMAN	10989000	18016000	2156100	13946000	10933000	13298000	25766000	32515000	2957300	25684000	32754000	21866000	12	1.75734e+07	1.03372e+07	P27348	14-3-3 protein theta (14-3-3 protein T-cell) (14-3-3 protein tau) (Protein HS1)	negative regulation of DNA-templated transcription [GO:0045892]; negative regulation of monoatomic ion transmembrane transport [GO:0034766]; protein targeting [GO:0006605]; signal transduction [GO:0007165]; small GTPase mediated signal transduction [GO:0007264]; substantia nigra development [GO:0021762]	cytoplasm [GO:0005737]; cytosol [GO:0005829]; extracellular exosome [GO:0070062]; focal adhesion [GO:0005925]; membrane [GO:0016020]; protein-containing complex [GO:0032991]; synapse [GO:0045202]	cytoplasm [GO:0005737]; cytosol [GO:0005829]; extracellular exosome [GO:0070062]; focal adhesion [GO:0005925]; membrane [GO:0016020]; protein-containing complex [GO:0032991]; synapse [GO:0045202]; 14-3-3 protein binding [GO:0071889]; identical protein binding [GO:0042802]; protein domain specific binding [GO:0019904]; transmembrane transporter binding [GO:0044325]; negative regulation of DNA-temp…	14-3-3 protein binding [GO:0071889]; identical protein binding [GO:0042802]; protein domain specific binding [GO:0019904]; transmembrane transporter binding [GO:0044325]	GO:0005737; GO:0005829; GO:0005925; GO:0006605; GO:0007165; GO:0007264; GO:0016020; GO:0019904; GO:0021762; GO:0032991; GO:0034766; GO:0042802; GO:0044325; GO:0045202; GO:0045892; GO:0070062; GO:0071889
sp|Q13765|NACA_HUMAN	NACA_HUMAN	16425000	8292300	14463000	18449000	10252000	22007000	11409000	19256000	29756000	26855000	20506000	12866000	12	1.75447e+07	6.5872e+06	Q13765	Nascent polypeptide-associated complex subunit alpha (NAC-alpha) (Alpha-NAC) (allergen Hom s 2)	cardiac ventricle development [GO:0003231]; heart trabecula morphogenesis [GO:0061384]; negative regulation of protein localization to endoplasmic reticulum [GO:1905551]; negative regulation of striated muscle cell apoptotic process [GO:0010664]; negative regulation of transcription by RNA polymerase II [GO:0000122]; positive regulation of cell proliferation involved in heart morphogenesis [GO:20…	cytoplasm [GO:0005737]; extracellular exosome [GO:0070062]; nascent polypeptide-associated complex [GO:0005854]; nucleus [GO:0005634]	cytoplasm [GO:0005737]; extracellular exosome [GO:0070062]; nascent polypeptide-associated complex [GO:0005854]; nucleus [GO:0005634]; DNA binding [GO:0003677]; transcription coactivator activity [GO:0003713]; cardiac ventricle development [GO:0003231]; heart trabecula morphogenesis [GO:0061384]; negative regulation of protein localization to endoplasmic reticulum [GO:1905551]; negative regulatio…	DNA binding [GO:0003677]; transcription coactivator activity [GO:0003713]	GO:0000122; GO:0003231; GO:0003677; GO:0003713; GO:0005634; GO:0005737; GO:0005854; GO:0006412; GO:0010664; GO:0015031; GO:0042060; GO:0043403; GO:0045944; GO:0048633; GO:0048742; GO:0061384; GO:0070062; GO:1905551; GO:2000138
sp|Q15084|PDIA6_HUMAN	PDIA6_HUMAN	17098000	8951500	623680	19928000	7273800	20580000	25234000	33952000	627930	38510000	23000000	14217000	12	1.74997e+07	1.19682e+07	Q15084	Protein disulfide-isomerase A6 (EC 5.3.4.1) (Endoplasmic reticulum protein 5) (ER protein 5) (ERp5) (Protein disulfide isomerase P5) (Thioredoxin domain-containing protein 7)	protein folding [GO:0006457]; response to endoplasmic reticulum stress [GO:0034976]	cytosol [GO:0005829]; endoplasmic reticulum [GO:0005783]; endoplasmic reticulum chaperone complex [GO:0034663]; endoplasmic reticulum lumen [GO:0005788]; endoplasmic reticulum membrane [GO:0005789]; endoplasmic reticulum-Golgi intermediate compartment [GO:0005793]; extracellular exosome [GO:0070062]; extracellular space [GO:0005615]; melanosome [GO:0042470]; plasma membrane [GO:0005886]	cytosol [GO:0005829]; endoplasmic reticulum [GO:0005783]; endoplasmic reticulum chaperone complex [GO:0034663]; endoplasmic reticulum lumen [GO:0005788]; endoplasmic reticulum membrane [GO:0005789]; endoplasmic reticulum-Golgi intermediate compartment [GO:0005793]; extracellular exosome [GO:0070062]; extracellular space [GO:0005615]; melanosome [GO:0042470]; plasma membrane [GO:0005886]; protein …	protein disulfide isomerase activity [GO:0003756]; protein-disulfide reductase activity [GO:0015035]	GO:0003756; GO:0005615; GO:0005783; GO:0005788; GO:0005789; GO:0005793; GO:0005829; GO:0005886; GO:0006457; GO:0015035; GO:0034663; GO:0034976; GO:0042470; GO:0070062
sp|P19105|ML12A_HUMAN	ML12A_HUMAN	20589000	16115000	12200000	11771000	8846600	9004900	12894000	31457000	14542000	25877000	34048000	11587000	12	1.7411e+07	8.65007e+06	P19105	Myosin regulatory light chain 12A (Epididymis secretory protein Li 24) (HEL-S-24) (MLC-2B) (Myosin RLC) (Myosin regulatory light chain 2, nonsarcomeric) (Myosin regulatory light chain MRLC3)	platelet aggregation [GO:0070527]	cytoplasm [GO:0005737]; cytosol [GO:0005829]; extracellular exosome [GO:0070062]; myosin complex [GO:0016459]	cytoplasm [GO:0005737]; cytosol [GO:0005829]; extracellular exosome [GO:0070062]; myosin complex [GO:0016459]; calcium ion binding [GO:0005509]; platelet aggregation [GO:0070527]	calcium ion binding [GO:0005509]	GO:0005509; GO:0005737; GO:0005829; GO:0016459; GO:0070062; GO:0070527
sp|P07237|PDIA1_HUMAN	PDIA1_HUMAN	18877000	15883000	1975600	14412000	10568000	16726000	19480000	23497000	2732400	26784000	26660000	27001000	12	1.70497e+07	8.63189e+06	P07237	Protein disulfide-isomerase (PDI) (EC 5.3.4.1) (Cellular thyroid hormone-binding protein) (Prolyl 4-hydroxylase subunit beta) (p55)	cellular response to hypoxia [GO:0071456]; cellular response to interleukin-7 [GO:0098761]; endoplasmic reticulum to Golgi vesicle-mediated transport [GO:0006888]; insulin processing [GO:0030070]; interleukin-12-mediated signaling pathway [GO:0035722]; interleukin-23-mediated signaling pathway [GO:0038155]; peptidyl-proline hydroxylation to 4-hydroxy-L-proline [GO:0018401]; positive regulation of…	cytoskeleton [GO:0005856]; cytosol [GO:0005829]; endoplasmic reticulum [GO:0005783]; endoplasmic reticulum chaperone complex [GO:0034663]; endoplasmic reticulum lumen [GO:0005788]; endoplasmic reticulum-Golgi intermediate compartment [GO:0005793]; external side of plasma membrane [GO:0009897]; extracellular exosome [GO:0070062]; extracellular region [GO:0005576]; focal adhesion [GO:0005925]; lame…	cytoskeleton [GO:0005856]; cytosol [GO:0005829]; endoplasmic reticulum [GO:0005783]; endoplasmic reticulum chaperone complex [GO:0034663]; endoplasmic reticulum lumen [GO:0005788]; endoplasmic reticulum-Golgi intermediate compartment [GO:0005793]; external side of plasma membrane [GO:0009897]; extracellular exosome [GO:0070062]; extracellular region [GO:0005576]; focal adhesion [GO:0005925]; lame…	actin binding [GO:0003779]; enzyme binding [GO:0019899]; integrin binding [GO:0005178]; procollagen-proline 4-dioxygenase activity [GO:0004656]; protein disulfide isomerase activity [GO:0003756]; protein heterodimerization activity [GO:0046982]; protein-disulfide reductase activity [GO:0015035]; RNA binding [GO:0003723]; thiol oxidase activity [GO:0016972]	GO:0003723; GO:0003756; GO:0003779; GO:0004656; GO:0005178; GO:0005576; GO:0005783; GO:0005788; GO:0005793; GO:0005829; GO:0005856; GO:0005925; GO:0006457; GO:0006888; GO:0009897; GO:0015035; GO:0016222; GO:0016972; GO:0018401; GO:0019899; GO:0030027; GO:0030070; GO:0032991; GO:0034663; GO:0034975; GO:0034976; GO:0035722; GO:0038155; GO:0042470; GO:0045785; GO:0046598; GO:0046982; GO:0070062; GO:…
sp|O43175|SERA_HUMAN	SERA_HUMAN	18025000	20368000	33138	15506000	9711700	15522000	18821000	34636000	81257	24596000	26328000	20933000	12	1.70468e+07	1.00839e+07	O43175	D-3-phosphoglycerate dehydrogenase (3-PGDH) (EC 1.1.1.95) (2-oxoglutarate reductase) (EC 1.1.1.399) (Malate dehydrogenase) (EC 1.1.1.37)	brain development [GO:0007420]; G1 to G0 transition [GO:0070314]; gamma-aminobutyric acid metabolic process [GO:0009448]; glial cell development [GO:0021782]; glutamine metabolic process [GO:0006541]; glycine metabolic process [GO:0006544]; L-serine biosynthetic process [GO:0006564]; neural tube development [GO:0021915]; neuron projection development [GO:0031175]; regulation of gene expression [G…	cytosol [GO:0005829]; extracellular exosome [GO:0070062]	cytosol [GO:0005829]; extracellular exosome [GO:0070062]; electron transfer activity [GO:0009055]; L-malate dehydrogenase activity [GO:0030060]; NAD binding [GO:0051287]; phosphoglycerate dehydrogenase activity [GO:0004617]; brain development [GO:0007420]; G1 to G0 transition [GO:0070314]; gamma-aminobutyric acid metabolic process [GO:0009448]; glial cell development [GO:0021782]; glutamine metab…	electron transfer activity [GO:0009055]; L-malate dehydrogenase activity [GO:0030060]; NAD binding [GO:0051287]; phosphoglycerate dehydrogenase activity [GO:0004617]	GO:0004617; GO:0005829; GO:0006541; GO:0006544; GO:0006564; GO:0006566; GO:0007420; GO:0009055; GO:0009448; GO:0010468; GO:0019530; GO:0021510; GO:0021782; GO:0021915; GO:0030060; GO:0031175; GO:0051287; GO:0070062; GO:0070314
sp|P15311|EZRI_HUMAN	EZRI_HUMAN	24163000	14108000	946690	14324000	10634000	16721000	25587000	31859000	1437800	21929000	24561000	17569000	12	1.69866e+07	9.45631e+06	P15311	Ezrin (Cytovillin) (Villin-2) (p81)	actin cytoskeleton reorganization [GO:0031532]; actin filament bundle assembly [GO:0051017]; astral microtubule organization [GO:0030953]; cellular response to cAMP [GO:0071320]; cortical microtubule organization [GO:0043622]; establishment of centrosome localization [GO:0051660]; establishment of endothelial barrier [GO:0061028]; establishment or maintenance of apical/basal cell polarity [GO:003…	actin cytoskeleton [GO:0015629]; actin filament [GO:0005884]; adherens junction [GO:0005912]; apical part of cell [GO:0045177]; apical plasma membrane [GO:0016324]; basolateral plasma membrane [GO:0016323]; brush border [GO:0005903]; cell periphery [GO:0071944]; cell projection [GO:0042995]; ciliary basal body [GO:0036064]; cortical cytoskeleton [GO:0030863]; cytoplasm [GO:0005737]; cytoplasmic s…	actin cytoskeleton [GO:0015629]; actin filament [GO:0005884]; adherens junction [GO:0005912]; apical part of cell [GO:0045177]; apical plasma membrane [GO:0016324]; basolateral plasma membrane [GO:0016323]; brush border [GO:0005903]; cell periphery [GO:0071944]; cell projection [GO:0042995]; ciliary basal body [GO:0036064]; cortical cytoskeleton [GO:0030863]; cytoplasm [GO:0005737]; cytoplasmic s…	actin binding [GO:0003779]; actin filament binding [GO:0051015]; ATPase binding [GO:0051117]; cadherin binding [GO:0045296]; cell adhesion molecule binding [GO:0050839]; disordered domain specific binding [GO:0097718]; identical protein binding [GO:0042802]; microtubule binding [GO:0008017]; protein domain specific binding [GO:0019904]; protein kinase A binding [GO:0051018]; protein kinase A cata…	GO:0000122; GO:0001650; GO:0001726; GO:0001772; GO:0001931; GO:0001951; GO:0003376; GO:0003723; GO:0003779; GO:0005615; GO:0005737; GO:0005768; GO:0005829; GO:0005884; GO:0005886; GO:0005902; GO:0005903; GO:0005912; GO:0005925; GO:0007159; GO:0008017; GO:0008360; GO:0010628; GO:0010737; GO:0015629; GO:0016020; GO:0016323; GO:0016324; GO:0019898; GO:0019904; GO:0022614; GO:0030033; GO:0030175; GO:…
sp|P62820|RAB1A_HUMAN	RAB1A_HUMAN	13489000	14399000	936920	10993000	14357000	17133000	34262000	35348000	2429800	19237000	21969000	18222000	12	1.6898e+07	1.04367e+07	P62820	Ras-related protein Rab-1A (EC 3.6.5.2) (YPT1-related protein)	autophagosome assembly [GO:0000045]; autophagy [GO:0006914]; cell migration [GO:0016477]; COPII-coated vesicle cargo loading [GO:0090110]; defense response to bacterium [GO:0042742]; endocytosis [GO:0006897]; endoplasmic reticulum to Golgi vesicle-mediated transport [GO:0006888]; Golgi organization [GO:0007030]; growth hormone secretion [GO:0030252]; intracellular protein transport [GO:0006886]; …	cytosol [GO:0005829]; early endosome [GO:0005769]; endomembrane system [GO:0012505]; endoplasmic reticulum [GO:0005783]; extracellular exosome [GO:0070062]; Golgi apparatus [GO:0005794]; Golgi membrane [GO:0000139]; melanosome [GO:0042470]; transport vesicle membrane [GO:0030658]	cytosol [GO:0005829]; early endosome [GO:0005769]; endomembrane system [GO:0012505]; endoplasmic reticulum [GO:0005783]; extracellular exosome [GO:0070062]; Golgi apparatus [GO:0005794]; Golgi membrane [GO:0000139]; melanosome [GO:0042470]; transport vesicle membrane [GO:0030658]; cadherin binding [GO:0045296]; G protein activity [GO:0003925]; GTP binding [GO:0005525]; GTPase activity [GO:0003924…	cadherin binding [GO:0045296]; G protein activity [GO:0003925]; GTP binding [GO:0005525]; GTPase activity [GO:0003924]	GO:0000045; GO:0000139; GO:0003924; GO:0003925; GO:0005525; GO:0005769; GO:0005783; GO:0005794; GO:0005829; GO:0006886; GO:0006888; GO:0006897; GO:0006914; GO:0007030; GO:0012505; GO:0016192; GO:0016477; GO:0019068; GO:0030252; GO:0030658; GO:0032402; GO:0032757; GO:0034446; GO:0042470; GO:0042742; GO:0045296; GO:0047496; GO:0070062; GO:0090110; GO:1903020
sp|Q99880|H2B1L_HUMAN	H2B1L_HUMAN	8364200	18020000	152510	4631900	0	7514400	14545000	91585000	8539100	13962000	16854000	16876000	11	1.67537e+07	2.43842e+07	Q99880	Histone H2B type 1-L (Histone H2B.c) (H2B/c)	nucleosome assembly [GO:0006334]	cytosol [GO:0005829]; extracellular exosome [GO:0070062]; nucleoplasm [GO:0005654]; nucleosome [GO:0000786]; nucleus [GO:0005634]	cytosol [GO:0005829]; extracellular exosome [GO:0070062]; nucleoplasm [GO:0005654]; nucleosome [GO:0000786]; nucleus [GO:0005634]; DNA binding [GO:0003677]; protein heterodimerization activity [GO:0046982]; structural constituent of chromatin [GO:0030527]; nucleosome assembly [GO:0006334]	DNA binding [GO:0003677]; protein heterodimerization activity [GO:0046982]; structural constituent of chromatin [GO:0030527]	GO:0000786; GO:0003677; GO:0005634; GO:0005654; GO:0005829; GO:0006334; GO:0030527; GO:0046982; GO:0070062
sp|Q99471|PFD5_HUMAN	PFD5_HUMAN	23484000	17171000	635240	16112000	11881000	15468000	18632000	29808000	3826900	28845000	20394000	13591000	12	1.6654e+07	8.74624e+06	Q99471	Prefoldin subunit 5 (Myc modulator 1) (c-Myc-binding protein Mm-1)	negative regulation of amyloid fibril formation [GO:1905907]; negative regulation of canonical Wnt signaling pathway [GO:0090090]; negative regulation of DNA-templated transcription [GO:0045892]; protein folding [GO:0006457]; protein stabilization [GO:0050821]; regulation of DNA-templated transcription [GO:0006355]; retina development in camera-type eye [GO:0060041]; RNA polymerase I assembly [GO…	cytoplasm [GO:0005737]; cytosol [GO:0005829]; intermediate filament cytoskeleton [GO:0045111]; nucleus [GO:0005634]; prefoldin complex [GO:0016272]	cytoplasm [GO:0005737]; cytosol [GO:0005829]; intermediate filament cytoskeleton [GO:0045111]; nucleus [GO:0005634]; prefoldin complex [GO:0016272]; amyloid-beta binding [GO:0001540]; transcription corepressor activity [GO:0003714]; unfolded protein binding [GO:0051082]; negative regulation of amyloid fibril formation [GO:1905907]; negative regulation of canonical Wnt signaling pathway [GO:009009…	amyloid-beta binding [GO:0001540]; transcription corepressor activity [GO:0003714]; unfolded protein binding [GO:0051082]	GO:0001540; GO:0003714; GO:0005634; GO:0005737; GO:0005829; GO:0006355; GO:0006457; GO:0016272; GO:0045111; GO:0045892; GO:0050821; GO:0051082; GO:0060041; GO:0090090; GO:1905907; GO:1990113; GO:1990114; GO:1990115
sp|P07741|APT_HUMAN	APT_HUMAN	38771000	4811400	170300	21243000	2894500	26407000	24882000	25158000	140700	41598000	8137100	5294200	12	16625600	1.4903e+07	P07741	Adenine phosphoribosyltransferase (APRT) (EC 2.4.2.7)	adenine salvage [GO:0006168]; AMP salvage [GO:0044209]; cellular response to insulin stimulus [GO:0032869]; GMP salvage [GO:0032263]; grooming behavior [GO:0007625]; IMP salvage [GO:0032264]; lactation [GO:0007595]; purine ribonucleoside salvage [GO:0006166]	cytoplasm [GO:0005737]; cytosol [GO:0005829]; extracellular exosome [GO:0070062]; extracellular region [GO:0005576]; nucleoplasm [GO:0005654]; secretory granule lumen [GO:0034774]	cytoplasm [GO:0005737]; cytosol [GO:0005829]; extracellular exosome [GO:0070062]; extracellular region [GO:0005576]; nucleoplasm [GO:0005654]; secretory granule lumen [GO:0034774]; adenine binding [GO:0002055]; adenine phosphoribosyltransferase activity [GO:0003999]; AMP binding [GO:0016208]; adenine salvage [GO:0006168]; AMP salvage [GO:0044209]; cellular response to insulin stimulus [GO:0032869…	adenine binding [GO:0002055]; adenine phosphoribosyltransferase activity [GO:0003999]; AMP binding [GO:0016208]	GO:0002055; GO:0003999; GO:0005576; GO:0005654; GO:0005737; GO:0005829; GO:0006166; GO:0006168; GO:0007595; GO:0007625; GO:0016208; GO:0032263; GO:0032264; GO:0032869; GO:0034774; GO:0044209; GO:0070062
sp|Q71UI9|H2AV_HUMAN	H2AV_HUMAN	4645800	7427700	185750	20558000	11562000	22479000	39363000	34436000	3861300	36156000	13846000	4854100	12	1.66146e+07	1.38124e+07	Q71UI9	Histone H2A.V (H2A.F/Z) (H2A.Z variant histone 2)		extracellular exosome [GO:0070062]; nucleosome [GO:0000786]; nucleus [GO:0005634]	extracellular exosome [GO:0070062]; nucleosome [GO:0000786]; nucleus [GO:0005634]; DNA binding [GO:0003677]; molecular adaptor activity [GO:0060090]; protein heterodimerization activity [GO:0046982]; structural constituent of chromatin [GO:0030527]	DNA binding [GO:0003677]; molecular adaptor activity [GO:0060090]; protein heterodimerization activity [GO:0046982]; structural constituent of chromatin [GO:0030527]	GO:0000786; GO:0003677; GO:0005634; GO:0030527; GO:0046982; GO:0060090; GO:0070062
sp|P11021|BIP_HUMAN	BIP_HUMAN	13371000	18819000	1703700	13641000	11396000	19757000	23671000	17638000	2961100	30074000	21164000	22500000	12	1.63913e+07	8.29467e+06	P11021	Endoplasmic reticulum chaperone BiP (EC 3.6.4.10) (78 kDa glucose-regulated protein) (GRP-78) (Binding-immunoglobulin protein) (BiP) (Heat shock protein 70 family protein 5) (HSP70 family protein 5) (Heat shock protein family A member 5) (Immunoglobulin heavy chain-binding protein)	cellular response to antibiotic [GO:0071236]; cellular response to calcium ion [GO:0071277]; cellular response to cAMP [GO:0071320]; cellular response to gamma radiation [GO:0071480]; cellular response to glucose starvation [GO:0042149]; cellular response to interleukin-4 [GO:0071353]; cellular response to manganese ion [GO:0071287]; cellular response to nerve growth factor stimulus [GO:1990090];…	cell surface [GO:0009986]; cytoplasm [GO:0005737]; cytosol [GO:0005829]; endoplasmic reticulum [GO:0005783]; endoplasmic reticulum chaperone complex [GO:0034663]; endoplasmic reticulum lumen [GO:0005788]; endoplasmic reticulum membrane [GO:0005789]; endoplasmic reticulum-Golgi intermediate compartment [GO:0005793]; extracellular exosome [GO:0070062]; focal adhesion [GO:0005925]; intracellular mem…	cell surface [GO:0009986]; cytoplasm [GO:0005737]; cytosol [GO:0005829]; endoplasmic reticulum [GO:0005783]; endoplasmic reticulum chaperone complex [GO:0034663]; endoplasmic reticulum lumen [GO:0005788]; endoplasmic reticulum membrane [GO:0005789]; endoplasmic reticulum-Golgi intermediate compartment [GO:0005793]; extracellular exosome [GO:0070062]; focal adhesion [GO:0005925]; intracellular mem…	ATP binding [GO:0005524]; ATP hydrolysis activity [GO:0016887]; ATP-dependent protein folding chaperone [GO:0140662]; cadherin binding [GO:0045296]; calcium ion binding [GO:0005509]; enzyme binding [GO:0019899]; heat shock protein binding [GO:0031072]; misfolded protein binding [GO:0051787]; protein domain specific binding [GO:0019904]; protein folding chaperone [GO:0044183]; protein-folding chap…	GO:0001554; GO:0005509; GO:0005524; GO:0005634; GO:0005737; GO:0005739; GO:0005783; GO:0005788; GO:0005789; GO:0005790; GO:0005793; GO:0005829; GO:0005886; GO:0005925; GO:0006983; GO:0009986; GO:0010976; GO:0016020; GO:0016887; GO:0019899; GO:0019904; GO:0021589; GO:0021680; GO:0021762; GO:0030182; GO:0030335; GO:0030433; GO:0030496; GO:0030512; GO:0030968; GO:0031072; GO:0031204; GO:0031333; GO:…
sp|Q01105|SET_HUMAN	SET_HUMAN	6595700	2990300	26815000	15576000	7363900	9626700	11871000	27960000	40187000	28439000	7791000	9601700	12	16234775	1.16679e+07	Q01105	Protein SET (HLA-DR-associated protein II) (Inhibitor of granzyme A-activated DNase) (IGAAD) (PHAPII) (Phosphatase 2A inhibitor I2PP2A) (I-2PP2A) (Template-activating factor I) (TAF-I)	DNA replication [GO:0006260]; negative regulation of DNA-templated transcription [GO:0045892]; negative regulation of histone acetylation [GO:0035067]; negative regulation of neuron apoptotic process [GO:0043524]; nucleosome assembly [GO:0006334]; nucleosome disassembly [GO:0006337]	chromatin [GO:0000785]; cytoplasm [GO:0005737]; cytosol [GO:0005829]; endoplasmic reticulum [GO:0005783]; lipid droplet [GO:0005811]; nucleoplasm [GO:0005654]; nucleus [GO:0005634]; perinuclear region of cytoplasm [GO:0048471]; protein-containing complex [GO:0032991]	chromatin [GO:0000785]; cytoplasm [GO:0005737]; cytosol [GO:0005829]; endoplasmic reticulum [GO:0005783]; lipid droplet [GO:0005811]; nucleoplasm [GO:0005654]; nucleus [GO:0005634]; perinuclear region of cytoplasm [GO:0048471]; protein-containing complex [GO:0032991]; chromatin binding [GO:0003682]; DNA binding [GO:0003677]; histone binding [GO:0042393]; protein phosphatase inhibitor activity [GO…	chromatin binding [GO:0003682]; DNA binding [GO:0003677]; histone binding [GO:0042393]; protein phosphatase inhibitor activity [GO:0004864]; protein phosphatase regulator activity [GO:0019888]	GO:0000785; GO:0003677; GO:0003682; GO:0004864; GO:0005634; GO:0005654; GO:0005737; GO:0005783; GO:0005811; GO:0005829; GO:0006260; GO:0006334; GO:0006337; GO:0019888; GO:0032991; GO:0035067; GO:0042393; GO:0043524; GO:0045892; GO:0048471
sp|P52597|HNRPF_HUMAN	HNRPF_HUMAN	13827000	10338000	1352800	26819000	10784000	19753000	22302000	37474000	897400	25195000	16150000	9732200	12	16218700	1.07106e+07	P52597	Heterogeneous nuclear ribonucleoprotein F (hnRNP F) (Nucleolin-like protein mcs94-1) [Cleaved into: Heterogeneous nuclear ribonucleoprotein F, N-terminally processed]	mRNA splicing, via spliceosome [GO:0000398]; regulation of RNA splicing [GO:0043484]; RNA processing [GO:0006396]	catalytic step 2 spliceosome [GO:0071013]; cytosol [GO:0005829]; membrane [GO:0016020]; nucleoplasm [GO:0005654]; nucleus [GO:0005634]; plasma membrane [GO:0005886]; ribonucleoprotein complex [GO:1990904]; synapse [GO:0045202]	catalytic step 2 spliceosome [GO:0071013]; cytosol [GO:0005829]; membrane [GO:0016020]; nucleoplasm [GO:0005654]; nucleus [GO:0005634]; plasma membrane [GO:0005886]; ribonucleoprotein complex [GO:1990904]; synapse [GO:0045202]; RNA binding [GO:0003723]; single-stranded RNA binding [GO:0003727]; mRNA splicing, via spliceosome [GO:0000398]; regulation of RNA splicing [GO:0043484]; RNA processing [G…	RNA binding [GO:0003723]; single-stranded RNA binding [GO:0003727]	GO:0000398; GO:0003723; GO:0003727; GO:0005634; GO:0005654; GO:0005829; GO:0005886; GO:0006396; GO:0016020; GO:0043484; GO:0045202; GO:0071013; GO:1990904
sp|P31943|HNRH1_HUMAN	HNRH1_HUMAN	8399100	7217800	1072900	20472000	15377000	23069000	18174000	52933000	1498500	24766000	15089000	6512900	12	16215100	1.40592e+07	P31943	Heterogeneous nuclear ribonucleoprotein H (hnRNP H) [Cleaved into: Heterogeneous nuclear ribonucleoprotein H, N-terminally processed]	mRNA splicing, via spliceosome [GO:0000398]; regulation of RNA splicing [GO:0043484]; RNA processing [GO:0006396]	catalytic step 2 spliceosome [GO:0071013]; cytosol [GO:0005829]; membrane [GO:0016020]; nucleoplasm [GO:0005654]; nucleus [GO:0005634]; ribonucleoprotein complex [GO:1990904]	catalytic step 2 spliceosome [GO:0071013]; cytosol [GO:0005829]; membrane [GO:0016020]; nucleoplasm [GO:0005654]; nucleus [GO:0005634]; ribonucleoprotein complex [GO:1990904]; identical protein binding [GO:0042802]; poly(U) RNA binding [GO:0008266]; RNA binding [GO:0003723]; mRNA splicing, via spliceosome [GO:0000398]; regulation of RNA splicing [GO:0043484]; RNA processing [GO:0006396]	identical protein binding [GO:0042802]; poly(U) RNA binding [GO:0008266]; RNA binding [GO:0003723]	GO:0000398; GO:0003723; GO:0005634; GO:0005654; GO:0005829; GO:0006396; GO:0008266; GO:0016020; GO:0042802; GO:0043484; GO:0071013; GO:1990904
sp|P21333|FLNA_HUMAN	FLNA_HUMAN	19162000	15039000	148210	17468000	6894200	14773000	18745000	29135000	409800	29308000	23821000	16791000	12	1.59745e+07	9.5859e+06	P21333	Filamin-A (FLN-A) (Actin-binding protein 280) (ABP-280) (Alpha-filamin) (Endothelial actin-binding protein) (Filamin-1) (Non-muscle filamin)	actin crosslink formation [GO:0051764]; actin cytoskeleton organization [GO:0030036]; actin cytoskeleton reorganization [GO:0031532]; adenylate cyclase-inhibiting dopamine receptor signaling pathway [GO:0007195]; angiogenesis [GO:0001525]; blood coagulation, intrinsic pathway [GO:0007597]; blood vessel remodeling [GO:0001974]; cell-cell junction organization [GO:0045216]; cilium assembly [GO:0060…	actin cytoskeleton [GO:0015629]; actin filament bundle [GO:0032432]; axonal growth cone [GO:0044295]; brush border [GO:0005903]; cell cortex [GO:0005938]; cell-cell junction [GO:0005911]; cytoplasm [GO:0005737]; cytosol [GO:0005829]; extracellular exosome [GO:0070062]; extracellular region [GO:0005576]; focal adhesion [GO:0005925]; glycoprotein Ib-IX-V complex [GO:1990779]; membrane [GO:0016020];…	actin cytoskeleton [GO:0015629]; actin filament bundle [GO:0032432]; axonal growth cone [GO:0044295]; brush border [GO:0005903]; cell cortex [GO:0005938]; cell-cell junction [GO:0005911]; cytoplasm [GO:0005737]; cytosol [GO:0005829]; extracellular exosome [GO:0070062]; extracellular region [GO:0005576]; focal adhesion [GO:0005925]; glycoprotein Ib-IX-V complex [GO:1990779]; membrane [GO:0016020];…	actin filament binding [GO:0051015]; cadherin binding [GO:0045296]; DNA-binding transcription factor binding [GO:0140297]; Fc-gamma receptor I complex binding [GO:0034988]; G protein-coupled receptor binding [GO:0001664]; GTPase binding [GO:0051020]; kinase binding [GO:0019900]; potassium channel regulator activity [GO:0015459]; protein homodimerization activity [GO:0042803]; protein kinase C bin…	GO:0001525; GO:0001664; GO:0001837; GO:0001974; GO:0003007; GO:0003723; GO:0005080; GO:0005576; GO:0005634; GO:0005730; GO:0005737; GO:0005802; GO:0005829; GO:0005886; GO:0005903; GO:0005911; GO:0005925; GO:0005938; GO:0007195; GO:0007597; GO:0010572; GO:0010977; GO:0015459; GO:0015629; GO:0016020; GO:0016479; GO:0019900; GO:0030018; GO:0030036; GO:0030334; GO:0031267; GO:0031523; GO:0031532; GO:…
sp|P62258|1433E_HUMAN	1433E_HUMAN	14159000	11833000	468050	18117000	11657000	20346000	22306000	40331000	6468600	24482000	12687000	8818400	12	1.59728e+07	1.0275e+07	P62258	14-3-3 protein epsilon (14-3-3E)	cellular response to heat [GO:0034605]; cerebral cortex development [GO:0021987]; hippocampus development [GO:0021766]; intracellular signal transduction [GO:0035556]; MAPK cascade [GO:0000165]; membrane repolarization during cardiac muscle cell action potential [GO:0086013]; negative regulation of calcium ion export across plasma membrane [GO:1905913]; negative regulation of calcium ion transmem…	cytoplasm [GO:0005737]; cytosol [GO:0005829]; extracellular exosome [GO:0070062]; focal adhesion [GO:0005925]; melanosome [GO:0042470]; membrane [GO:0016020]; nucleus [GO:0005634]	cytoplasm [GO:0005737]; cytosol [GO:0005829]; extracellular exosome [GO:0070062]; focal adhesion [GO:0005925]; melanosome [GO:0042470]; membrane [GO:0016020]; nucleus [GO:0005634]; cadherin binding [GO:0045296]; calcium channel regulator activity [GO:0005246]; enzyme binding [GO:0019899]; histone deacetylase binding [GO:0042826]; identical protein binding [GO:0042802]; MHC class II protein comple…	cadherin binding [GO:0045296]; calcium channel regulator activity [GO:0005246]; enzyme binding [GO:0019899]; histone deacetylase binding [GO:0042826]; identical protein binding [GO:0042802]; MHC class II protein complex binding [GO:0023026]; phosphoprotein binding [GO:0051219]; phosphoserine residue binding [GO:0050815]; potassium channel regulator activity [GO:0015459]; protein domain specific b…	GO:0000165; GO:0001764; GO:0003064; GO:0003723; GO:0005246; GO:0005634; GO:0005737; GO:0005829; GO:0005925; GO:0006605; GO:0007165; GO:0007346; GO:0015459; GO:0016020; GO:0019899; GO:0019903; GO:0019904; GO:0021762; GO:0021766; GO:0021987; GO:0023026; GO:0031625; GO:0034504; GO:0034605; GO:0035556; GO:0042470; GO:0042802; GO:0042826; GO:0044325; GO:0045296; GO:0046827; GO:0046982; GO:0050815; GO:…
sp|P55072|TERA_HUMAN	TERA_HUMAN	17743000	14166000	678800	17921000	5862600	13555000	22239000	33116000	1461100	21269000	26064000	14922000	12	1.57498e+07	9.65917e+06	P55072	Transitional endoplasmic reticulum ATPase (TER ATPase) (EC 3.6.4.6) (15S Mg(2+)-ATPase p97 subunit) (Valosin-containing protein) (VCP)	activation of cysteine-type endopeptidase activity involved in apoptotic process [GO:0006919]; aggresome assembly [GO:0070842]; ATP metabolic process [GO:0046034]; autophagosome maturation [GO:0097352]; autophagy [GO:0006914]; cellular response to arsenite ion [GO:1903843]; cellular response to heat [GO:0034605]; DNA damage response [GO:0006974]; DNA repair [GO:0006281]; double-strand break repai…	ATPase complex [GO:1904949]; azurophil granule lumen [GO:0035578]; cytoplasm [GO:0005737]; cytoplasmic stress granule [GO:0010494]; cytosol [GO:0005829]; Derlin-1 retrotranslocation complex [GO:0036513]; endoplasmic reticulum [GO:0005783]; endoplasmic reticulum membrane [GO:0005789]; extracellular exosome [GO:0070062]; extracellular region [GO:0005576]; ficolin-1-rich granule lumen [GO:1904813]; …	ATPase complex [GO:1904949]; azurophil granule lumen [GO:0035578]; cytoplasm [GO:0005737]; cytoplasmic stress granule [GO:0010494]; cytosol [GO:0005829]; Derlin-1 retrotranslocation complex [GO:0036513]; endoplasmic reticulum [GO:0005783]; endoplasmic reticulum membrane [GO:0005789]; extracellular exosome [GO:0070062]; extracellular region [GO:0005576]; ficolin-1-rich granule lumen [GO:1904813]; …	ADP binding [GO:0043531]; ATP binding [GO:0005524]; ATP hydrolysis activity [GO:0016887]; BAT3 complex binding [GO:1904288]; deubiquitinase activator activity [GO:0035800]; identical protein binding [GO:0042802]; K48-linked polyubiquitin modification-dependent protein binding [GO:0036435]; lipid binding [GO:0008289]; MHC class I protein binding [GO:0042288]; polyubiquitin modification-dependent p…	GO:0000502; GO:0003723; GO:0005524; GO:0005576; GO:0005634; GO:0005654; GO:0005737; GO:0005783; GO:0005789; GO:0005811; GO:0005829; GO:0006281; GO:0006302; GO:0006734; GO:0006888; GO:0006914; GO:0006919; GO:0006974; GO:0008289; GO:0010494; GO:0010498; GO:0010918; GO:0016236; GO:0016567; GO:0016887; GO:0019079; GO:0019903; GO:0019904; GO:0019985; GO:0030433; GO:0030968; GO:0030970; GO:0031334; GO:…
sp|P08133|ANXA6_HUMAN	ANXA6_HUMAN	7782400	13742000	2256800	9360800	11068000	15470000	55687000	26908000	4221600	13436000	14995000	9284700	12	15351025	1.41761e+07	P08133	Annexin A6 (67 kDa calelectrin) (Annexin VI) (Annexin-6) (Calphobindin-II) (CPB-II) (Chromobindin-20) (Lipocortin VI) (Protein III) (p68) (p70)	apoptotic signaling pathway [GO:0097190]; growth plate cartilage chondrocyte differentiation [GO:0003418]; mitochondrial calcium ion homeostasis [GO:0051560]; monoatomic ion transmembrane transport [GO:0034220]; negative regulation of sequestering of calcium ion [GO:0051283]; neural crest cell migration [GO:0001755]; plasma membrane repair [GO:0001778]; regulation of muscle contraction [GO:000693…	collagen-containing extracellular matrix [GO:0062023]; cytoplasm [GO:0005737]; extracellular exosome [GO:0070062]; focal adhesion [GO:0005925]; late endosome membrane [GO:0031902]; lysosomal membrane [GO:0005765]; melanosome [GO:0042470]; membrane [GO:0016020]; mitochondrion [GO:0005739]; perinuclear region of cytoplasm [GO:0048471]	collagen-containing extracellular matrix [GO:0062023]; cytoplasm [GO:0005737]; extracellular exosome [GO:0070062]; focal adhesion [GO:0005925]; late endosome membrane [GO:0031902]; lysosomal membrane [GO:0005765]; melanosome [GO:0042470]; membrane [GO:0016020]; mitochondrion [GO:0005739]; perinuclear region of cytoplasm [GO:0048471]; actin filament binding [GO:0051015]; calcium channel activity […	actin filament binding [GO:0051015]; calcium channel activity [GO:0005262]; calcium ion binding [GO:0005509]; calcium-dependent phospholipid binding [GO:0005544]; calcium-dependent protein binding [GO:0048306]; cholesterol binding [GO:0015485]; chondroitin sulfate binding [GO:0035374]; GTP binding [GO:0005525]; identical protein binding [GO:0042802]; ligand-gated monoatomic ion channel activity […	GO:0001755; GO:0001778; GO:0001786; GO:0003418; GO:0005262; GO:0005509; GO:0005525; GO:0005544; GO:0005737; GO:0005739; GO:0005765; GO:0005925; GO:0006937; GO:0008289; GO:0015276; GO:0015485; GO:0016020; GO:0031902; GO:0034220; GO:0035374; GO:0042470; GO:0042802; GO:0048306; GO:0048471; GO:0051015; GO:0051283; GO:0051560; GO:0062023; GO:0070062; GO:0097190
sp|P07900|HS90A_HUMAN	HS90A_HUMAN	14515000	11412000	985620	13891000	9312000	21005000	15006000	29722000	2421100	24782000	23232000	13122000	12	1.49505e+07	8.63961e+06	P07900	Heat shock protein HSP 90-alpha (EC 3.6.4.10) (Heat shock 86 kDa) (HSP 86) (HSP86) (Lipopolysaccharide-associated protein 2) (LAP-2) (LPS-associated protein 2) (Renal carcinoma antigen NY-REN-38)	activation of innate immune response [GO:0002218]; axon extension [GO:0048675]; cardiac muscle cell apoptotic process [GO:0010659]; cellular response to heat [GO:0034605]; cellular response to virus [GO:0098586]; central nervous system neuron axonogenesis [GO:0021955]; chaperone-mediated autophagy [GO:0061684]; chaperone-mediated protein complex assembly [GO:0051131]; establishment of cell polari…	apical plasma membrane [GO:0016324]; axonal growth cone [GO:0044295]; basolateral plasma membrane [GO:0016323]; brush border membrane [GO:0031526]; cell surface [GO:0009986]; collagen-containing extracellular matrix [GO:0062023]; cytoplasm [GO:0005737]; cytosol [GO:0005829]; dendritic growth cone [GO:0044294]; endocytic vesicle lumen [GO:0071682]; extracellular exosome [GO:0070062]; extracellular…	apical plasma membrane [GO:0016324]; axonal growth cone [GO:0044295]; basolateral plasma membrane [GO:0016323]; brush border membrane [GO:0031526]; cell surface [GO:0009986]; collagen-containing extracellular matrix [GO:0062023]; cytoplasm [GO:0005737]; cytosol [GO:0005829]; dendritic growth cone [GO:0044294]; endocytic vesicle lumen [GO:0071682]; extracellular exosome [GO:0070062]; extracellular…	ATP binding [GO:0005524]; ATP hydrolysis activity [GO:0016887]; ATP-dependent protein folding chaperone [GO:0140662]; CTP binding [GO:0002135]; dATP binding [GO:0032564]; disordered domain specific binding [GO:0097718]; DNA polymerase binding [GO:0070182]; GTP binding [GO:0005525]; GTPase binding [GO:0051020]; histone deacetylase binding [GO:0042826]; identical protein binding [GO:0042802]; MHC c…	GO:0001764; GO:0001934; GO:0002134; GO:0002135; GO:0002218; GO:0002230; GO:0003009; GO:0003723; GO:0003729; GO:0005524; GO:0005525; GO:0005576; GO:0005634; GO:0005654; GO:0005737; GO:0005739; GO:0005829; GO:0005886; GO:0006457; GO:0006839; GO:0006986; GO:0007004; GO:0009408; GO:0009409; GO:0009410; GO:0009651; GO:0009986; GO:0010592; GO:0010659; GO:0016020; GO:0016323; GO:0016324; GO:0016887; GO:…
sp|P60033|CD81_HUMAN	CD81_HUMAN	8196800	17105000	1072300	0	7840500	15056000	48025000	43888000	1173500	11724000	18950000	4596500	11	14802300	1.58728e+07	P60033	CD81 antigen (26 kDa cell surface protein TAPA-1) (Target of the antiproliferative antibody 1) (Tetraspanin-28) (Tspan-28) (CD antigen CD81)	CD4-positive, alpha-beta T cell costimulation [GO:0035783]; cellular response to low-density lipoprotein particle stimulus [GO:0071404]; humoral immune response mediated by circulating immunoglobulin [GO:0002455]; immunological synapse formation [GO:0001771]; macrophage fusion [GO:0034238]; myoblast fusion involved in skeletal muscle regeneration [GO:0014905]; osteoclast fusion [GO:0072675]; posi…	basal plasma membrane [GO:0009925]; basolateral plasma membrane [GO:0016323]; extracellular exosome [GO:0070062]; focal adhesion [GO:0005925]; immunological synapse [GO:0001772]; membrane [GO:0016020]; plasma membrane [GO:0005886]; tetraspanin-enriched microdomain [GO:0097197]; vesicle [GO:0031982]	basal plasma membrane [GO:0009925]; basolateral plasma membrane [GO:0016323]; extracellular exosome [GO:0070062]; focal adhesion [GO:0005925]; immunological synapse [GO:0001772]; membrane [GO:0016020]; plasma membrane [GO:0005886]; tetraspanin-enriched microdomain [GO:0097197]; vesicle [GO:0031982]; cholesterol binding [GO:0015485]; integrin binding [GO:0005178]; MHC class II protein binding [GO:…	cholesterol binding [GO:0015485]; integrin binding [GO:0005178]; MHC class II protein binding [GO:0042289]; MHC class II protein complex binding [GO:0023026]; transferrin receptor binding [GO:1990459]; virus receptor activity [GO:0001618]	GO:0001618; GO:0001771; GO:0001772; GO:0002455; GO:0002863; GO:0005178; GO:0005886; GO:0005925; GO:0008104; GO:0008284; GO:0009925; GO:0014905; GO:0015485; GO:0016020; GO:0016323; GO:0023026; GO:0030890; GO:0031623; GO:0031647; GO:0031982; GO:0034238; GO:0035783; GO:0042289; GO:0043128; GO:0043410; GO:0045944; GO:0046718; GO:0046813; GO:0050731; GO:0050861; GO:0050862; GO:0061462; GO:0070062; GO:…
sp|P23284|PPIB_HUMAN	PPIB_HUMAN	2530400	4504200	1930600	15141000	18060000	21702000	25886000	25073000	10464000	26340000	8768400	12881000	12	14440050	9.04265e+06	P23284	Peptidyl-prolyl cis-trans isomerase B (PPIase B) (EC 5.2.1.8) (CYP-S1) (Cyclophilin B) (Rotamase B) (S-cyclophilin) (SCYLP)	bone development [GO:0060348]; chaperone-mediated protein folding [GO:0061077]; neutrophil chemotaxis [GO:0030593]; positive regulation by host of viral genome replication [GO:0044829]; positive regulation by host of viral process [GO:0044794]; positive regulation of multicellular organism growth [GO:0040018]; protein folding [GO:0006457]; protein peptidyl-prolyl isomerization [GO:0000413]; prote…	cytoplasm [GO:0005737]; cytosol [GO:0005829]; endoplasmic reticulum [GO:0005783]; endoplasmic reticulum chaperone complex [GO:0034663]; endoplasmic reticulum lumen [GO:0005788]; extracellular exosome [GO:0070062]; focal adhesion [GO:0005925]; intracellular membrane-bounded organelle [GO:0043231]; melanosome [GO:0042470]; membrane [GO:0016020]; nucleoplasm [GO:0005654]; nucleus [GO:0005634]; perin…	cytoplasm [GO:0005737]; cytosol [GO:0005829]; endoplasmic reticulum [GO:0005783]; endoplasmic reticulum chaperone complex [GO:0034663]; endoplasmic reticulum lumen [GO:0005788]; extracellular exosome [GO:0070062]; focal adhesion [GO:0005925]; intracellular membrane-bounded organelle [GO:0043231]; melanosome [GO:0042470]; membrane [GO:0016020]; nucleoplasm [GO:0005654]; nucleus [GO:0005634]; perin…	cyclosporin A binding [GO:0016018]; peptidyl-prolyl cis-trans isomerase activity [GO:0003755]; RNA binding [GO:0003723]; RNA polymerase binding [GO:0070063]; unfolded protein binding [GO:0051082]	GO:0000413; GO:0003723; GO:0003755; GO:0005634; GO:0005654; GO:0005737; GO:0005783; GO:0005788; GO:0005790; GO:0005829; GO:0005925; GO:0006457; GO:0016018; GO:0016020; GO:0030593; GO:0032991; GO:0034663; GO:0040018; GO:0042470; GO:0043231; GO:0044794; GO:0044829; GO:0048471; GO:0050821; GO:0051082; GO:0060348; GO:0061077; GO:0070062; GO:0070063
sp|P32119|PRDX2_HUMAN	PRDX2_HUMAN	12834000	5816000	1689800	13804000	10378000	19302000	22857000	35180000	2014400	30662000	8762700	9181400	12	1.43734e+07	1.0696e+07	P32119	Peroxiredoxin-2 (EC 1.11.1.24) (Natural killer cell-enhancing factor B) (NKEF-B) (PRP) (Thiol-specific antioxidant protein) (TSA) (Thioredoxin peroxidase 1) (Thioredoxin-dependent peroxide reductase 1) (Thioredoxin-dependent peroxiredoxin 2)	cell redox homeostasis [GO:0045454]; cellular response to oxidative stress [GO:0034599]; defense response to tumor cell [GO:0002357]; extrinsic apoptotic signaling pathway [GO:0097191]; hydrogen peroxide catabolic process [GO:0042744]; leukocyte activation [GO:0045321]; negative regulation of apoptotic process [GO:0043066]; negative regulation of extrinsic apoptotic signaling pathway in absence o…	cytoplasm [GO:0005737]; cytosol [GO:0005829]; extracellular exosome [GO:0070062]	cytoplasm [GO:0005737]; cytosol [GO:0005829]; extracellular exosome [GO:0070062]; antioxidant activity [GO:0016209]; thioredoxin peroxidase activity [GO:0008379]; cell redox homeostasis [GO:0045454]; cellular response to oxidative stress [GO:0034599]; defense response to tumor cell [GO:0002357]; extrinsic apoptotic signaling pathway [GO:0097191]; hydrogen peroxide catabolic process [GO:0042744]; …	antioxidant activity [GO:0016209]; thioredoxin peroxidase activity [GO:0008379]	GO:0002357; GO:0002536; GO:0005737; GO:0005829; GO:0006979; GO:0008379; GO:0010310; GO:0016209; GO:0019430; GO:0030194; GO:0031665; GO:0032088; GO:0032496; GO:0034599; GO:0042098; GO:0042744; GO:0042981; GO:0043029; GO:0043066; GO:0043410; GO:0045321; GO:0045454; GO:0045581; GO:0048538; GO:0070062; GO:0097191; GO:2001240
sp|P00558|PGK1_HUMAN	PGK1_HUMAN	4967400	6548000	2152800	13749000	9999800	30492000	26593000	20557000	13413000	24489000	9221600	9700800	12	1.43236e+07	9.133e+06	P00558	Phosphoglycerate kinase 1 (EC 2.7.2.3) (Cell migration-inducing gene 10 protein) (Primer recognition protein 2) (PRP 2)	canonical glycolysis [GO:0061621]; cellular response to hypoxia [GO:0071456]; epithelial cell differentiation [GO:0030855]; gluconeogenesis [GO:0006094]; glycolytic process [GO:0006096]; negative regulation of angiogenesis [GO:0016525]; phosphorylation [GO:0016310]; plasminogen activation [GO:0031639]	cytosol [GO:0005829]; extracellular exosome [GO:0070062]; extracellular space [GO:0005615]; membrane [GO:0016020]; membrane raft [GO:0045121]	cytosol [GO:0005829]; extracellular exosome [GO:0070062]; extracellular space [GO:0005615]; membrane [GO:0016020]; membrane raft [GO:0045121]; ADP binding [GO:0043531]; ATP binding [GO:0005524]; phosphoglycerate kinase activity [GO:0004618]; protein-disulfide reductase (NAD(P)) activity [GO:0047134]; canonical glycolysis [GO:0061621]; cellular response to hypoxia [GO:0071456]; epithelial cell dif…	ADP binding [GO:0043531]; ATP binding [GO:0005524]; phosphoglycerate kinase activity [GO:0004618]; protein-disulfide reductase (NAD(P)) activity [GO:0047134]	GO:0004618; GO:0005524; GO:0005615; GO:0005829; GO:0006094; GO:0006096; GO:0016020; GO:0016310; GO:0016525; GO:0030855; GO:0031639; GO:0043531; GO:0045121; GO:0047134; GO:0061621; GO:0070062; GO:0071456
sp|P04216|THY1_HUMAN	THY1_HUMAN	6261800	11253000	1458900	17001000	17811000	25899000	20008000	12358000	1102400	21685000	20952000	16019000	12	14317425	8.00692e+06	P04216	Thy-1 membrane glycoprotein (CDw90) (Thy-1 antigen) (CD antigen CD90)	angiogenesis [GO:0001525]; cell-cell adhesion [GO:0098609]; cell-cell signaling [GO:0007267]; cytoskeleton organization [GO:0007010]; focal adhesion assembly [GO:0048041]; integrin-mediated signaling pathway [GO:0007229]; negative regulation of axonogenesis [GO:0050771]; negative regulation of cell migration [GO:0030336]; negative regulation of neuron projection regeneration [GO:0070571]; negativ…	apical plasma membrane [GO:0016324]; axolemma [GO:0030673]; cell surface [GO:0009986]; cytosol [GO:0005829]; dendrite membrane [GO:0032590]; endoplasmic reticulum [GO:0005783]; external side of plasma membrane [GO:0009897]; extracellular exosome [GO:0070062]; extracellular region [GO:0005576]; focal adhesion [GO:0005925]; growth cone [GO:0030426]; membrane raft [GO:0045121]; neuronal cell body me…	apical plasma membrane [GO:0016324]; axolemma [GO:0030673]; cell surface [GO:0009986]; cytosol [GO:0005829]; dendrite membrane [GO:0032590]; endoplasmic reticulum [GO:0005783]; external side of plasma membrane [GO:0009897]; extracellular exosome [GO:0070062]; extracellular region [GO:0005576]; focal adhesion [GO:0005925]; growth cone [GO:0030426]; membrane raft [GO:0045121]; neuronal cell body me…	GPI anchor binding [GO:0034235]; GTPase activator activity [GO:0005096]; integrin binding [GO:0005178]; protein kinase binding [GO:0019901]	GO:0001525; GO:0001952; GO:0002693; GO:0005096; GO:0005178; GO:0005576; GO:0005783; GO:0005829; GO:0005886; GO:0005925; GO:0006469; GO:0007010; GO:0007229; GO:0007267; GO:0009897; GO:0009986; GO:0016324; GO:0019901; GO:0030336; GO:0030426; GO:0030673; GO:0032590; GO:0032809; GO:0034116; GO:0034235; GO:0043113; GO:0043547; GO:0045121; GO:0046549; GO:0046777; GO:0048041; GO:0048678; GO:0050771; GO:…
sp|P38646|GRP75_HUMAN	GRP75_HUMAN	17414000	14231000	837480	13297000	7141400	16069000	19230000	12356000	1222200	29091000	19253000	20459000	12	1.42168e+07	8.12734e+06	P38646	Stress-70 protein, mitochondrial (75 kDa glucose-regulated protein) (GRP-75) (Heat shock 70 kDa protein 9) (Mortalin) (MOT) (Peptide-binding protein 74) (PBP74)	chaperone cofactor-dependent protein refolding [GO:0051085]; erythrocyte differentiation [GO:0030218]; inner mitochondrial membrane organization [GO:0007007]; intracellular protein transport [GO:0006886]; iron-sulfur cluster assembly [GO:0016226]; negative regulation of apoptotic process [GO:0043066]; negative regulation of erythrocyte differentiation [GO:0045647]; negative regulation of hematopo…	cytoplasm [GO:0005737]; extracellular exosome [GO:0070062]; focal adhesion [GO:0005925]; MIB complex [GO:0140275]; mitochondrial matrix [GO:0005759]; mitochondrial nucleoid [GO:0042645]; mitochondrion [GO:0005739]; nucleolus [GO:0005730]; SAM complex [GO:0001401]; TIM23 mitochondrial import inner membrane translocase complex [GO:0005744]	cytoplasm [GO:0005737]; extracellular exosome [GO:0070062]; focal adhesion [GO:0005925]; MIB complex [GO:0140275]; mitochondrial matrix [GO:0005759]; mitochondrial nucleoid [GO:0042645]; mitochondrion [GO:0005739]; nucleolus [GO:0005730]; SAM complex [GO:0001401]; TIM23 mitochondrial import inner membrane translocase complex [GO:0005744]; ATP binding [GO:0005524]; ATP hydrolysis activity [GO:0016…	ATP binding [GO:0005524]; ATP hydrolysis activity [GO:0016887]; ATP-dependent protein folding chaperone [GO:0140662]; heat shock protein binding [GO:0031072]; protein folding chaperone [GO:0044183]; RNA binding [GO:0003723]; ubiquitin protein ligase binding [GO:0031625]; unfolded protein binding [GO:0051082]	GO:0001401; GO:0003723; GO:0005524; GO:0005730; GO:0005737; GO:0005739; GO:0005744; GO:0005759; GO:0005925; GO:0006611; GO:0006886; GO:0007007; GO:0016226; GO:0016887; GO:0030218; GO:0031072; GO:0031625; GO:0042026; GO:0042645; GO:0043066; GO:0044183; GO:0045646; GO:0045647; GO:0051082; GO:0051085; GO:0070062; GO:0140275; GO:0140662; GO:1902037; GO:1903707
sp|P09496|CLCA_HUMAN	CLCA_HUMAN	2336900	3727300	6102600	5153800	11196000	12189000	15432000	71394000	17096000	8357500	5290100	10110000	12	14032100	1.86398e+07	P09496	Clathrin light chain A (Lca)	cell cycle [GO:0007049]; cell division [GO:0051301]; clathrin coat assembly [GO:0048268]; clathrin-dependent endocytosis [GO:0072583]; intracellular protein transport [GO:0006886]	clathrin coat [GO:0030118]; clathrin coat of coated pit [GO:0030132]; clathrin coat of trans-Golgi network vesicle [GO:0030130]; clathrin complex [GO:0071439]; clathrin vesicle coat [GO:0030125]; clathrin-coated endocytic vesicle [GO:0045334]; cytoplasmic vesicle [GO:0031410]; cytosol [GO:0005829]; endolysosome membrane [GO:0036020]; membrane [GO:0016020]; plasma membrane [GO:0005886]; postsynapt…	clathrin coat [GO:0030118]; clathrin coat of coated pit [GO:0030132]; clathrin coat of trans-Golgi network vesicle [GO:0030130]; clathrin complex [GO:0071439]; clathrin vesicle coat [GO:0030125]; clathrin-coated endocytic vesicle [GO:0045334]; cytoplasmic vesicle [GO:0031410]; cytosol [GO:0005829]; endolysosome membrane [GO:0036020]; membrane [GO:0016020]; plasma membrane [GO:0005886]; postsynapt…	clathrin heavy chain binding [GO:0032050]; GTPase binding [GO:0051020]; peptide binding [GO:0042277]; protein-containing complex binding [GO:0044877]; structural molecule activity [GO:0005198]	GO:0005198; GO:0005819; GO:0005829; GO:0005886; GO:0006886; GO:0007049; GO:0016020; GO:0030118; GO:0030125; GO:0030130; GO:0030132; GO:0030672; GO:0031410; GO:0032050; GO:0032588; GO:0036020; GO:0042277; GO:0044877; GO:0045334; GO:0048268; GO:0051020; GO:0051301; GO:0071439; GO:0072583; GO:0098835; GO:0099631
sp|P62304|RUXE_HUMAN	RUXE_HUMAN	18223000	10332000	5404100	11297000	1959900	12621000	23711000	27100000	12336000	0	23317000	21199000	11	1.39583e+07	8.85562e+06	P62304	Small nuclear ribonucleoprotein E (snRNP-E) (Sm protein E) (Sm-E) (SmE)	7-methylguanosine cap hypermethylation [GO:0036261]; mRNA splicing, via spliceosome [GO:0000398]; spliceosomal complex assembly [GO:0000245]; spliceosomal snRNP assembly [GO:0000387]; U2-type prespliceosome assembly [GO:1903241]	catalytic step 2 spliceosome [GO:0071013]; cytosol [GO:0005829]; methylosome [GO:0034709]; nucleoplasm [GO:0005654]; nucleus [GO:0005634]; pICln-Sm protein complex [GO:0034715]; precatalytic spliceosome [GO:0071011]; small nuclear ribonucleoprotein complex [GO:0030532]; SMN-Sm protein complex [GO:0034719]; spliceosomal complex [GO:0005681]; telomerase holoenzyme complex [GO:0005697]; U1 snRNP [GO…	catalytic step 2 spliceosome [GO:0071013]; cytosol [GO:0005829]; methylosome [GO:0034709]; nucleoplasm [GO:0005654]; nucleus [GO:0005634]; pICln-Sm protein complex [GO:0034715]; precatalytic spliceosome [GO:0071011]; small nuclear ribonucleoprotein complex [GO:0030532]; SMN-Sm protein complex [GO:0034719]; spliceosomal complex [GO:0005681]; telomerase holoenzyme complex [GO:0005697]; U1 snRNP [GO…	RNA binding [GO:0003723]	GO:0000245; GO:0000387; GO:0000398; GO:0003723; GO:0005634; GO:0005654; GO:0005681; GO:0005682; GO:0005683; GO:0005685; GO:0005686; GO:0005687; GO:0005689; GO:0005697; GO:0005829; GO:0030532; GO:0034709; GO:0034715; GO:0034719; GO:0036261; GO:0046540; GO:0071005; GO:0071007; GO:0071011; GO:0071013; GO:1903241
sp|P62328|TYB4_HUMAN	TYB4_HUMAN	7241600	11879000	14446000	2887400	13986000	17813000	0	3858200	46677000	17573000	12264000	18060000	11	1.38904e+07	1.2012e+07	P62328	Thymosin beta-4 (T beta-4) (Fx) [Cleaved into: Hematopoietic system regulatory peptide (Seraspenide)]	actin filament organization [GO:0007015]; cytoplasmic sequestering of NF-kappaB [GO:0007253]; negative regulation of cell cycle G1/S phase transition [GO:1902807]; negative regulation of hematopoietic stem cell differentiation [GO:1902037]; negative regulation of interleukin-8 production [GO:0032717]; negative regulation of NF-kappaB transcription factor activity [GO:0032088]; negative regulation…	cytoplasm [GO:0005737]; cytoskeleton [GO:0005856]; cytosol [GO:0005829]; extracellular region [GO:0005576]; nucleus [GO:0005634]; platelet alpha granule lumen [GO:0031093]	cytoplasm [GO:0005737]; cytoskeleton [GO:0005856]; cytosol [GO:0005829]; extracellular region [GO:0005576]; nucleus [GO:0005634]; platelet alpha granule lumen [GO:0031093]; actin monomer binding [GO:0003785]; enzyme binding [GO:0019899]; RNA binding [GO:0003723]; actin filament organization [GO:0007015]; cytoplasmic sequestering of NF-kappaB [GO:0007253]; negative regulation of cell cycle G1/S ph…	actin monomer binding [GO:0003785]; enzyme binding [GO:0019899]; RNA binding [GO:0003723]	GO:0003723; GO:0003785; GO:0005576; GO:0005634; GO:0005737; GO:0005829; GO:0005856; GO:0007015; GO:0007253; GO:0019899; GO:0030334; GO:0031093; GO:0032088; GO:0032717; GO:0033209; GO:0042989; GO:0043536; GO:0050727; GO:1901222; GO:1901223; GO:1902037; GO:1902807; GO:1903026; GO:1905273; GO:2001028; GO:2001171
sp|Q15185|TEBP_HUMAN	TEBP_HUMAN	7702200	5332300	937600	11481000	12063000	18520000	16625000	43530000	1625600	24647000	15974000	6247000	12	13723725	1.17722e+07	Q15185	Prostaglandin E synthase 3 (EC 5.3.99.3) (Cytosolic prostaglandin E2 synthase) (cPGES) (Hsp90 co-chaperone) (Progesterone receptor complex p23) (Telomerase-binding protein p23)	chaperone cofactor-dependent protein refolding [GO:0051085]; chaperone-mediated protein complex assembly [GO:0051131]; cyclooxygenase pathway [GO:0019371]; fibroblast proliferation [GO:0048144]; glucocorticoid receptor signaling pathway [GO:0042921]; glycogen biosynthetic process [GO:0005978]; lung saccule development [GO:0060430]; positive regulation of phosphorylation [GO:0042327]; positive reg…	chromosome, telomeric region [GO:0000781]; cytosol [GO:0005829]; nucleoplasm [GO:0005654]; nucleus [GO:0005634]; protein folding chaperone complex [GO:0101031]; protein-containing complex [GO:0032991]; telomerase holoenzyme complex [GO:0005697]	chromosome, telomeric region [GO:0000781]; cytosol [GO:0005829]; nucleoplasm [GO:0005654]; nucleus [GO:0005634]; protein folding chaperone complex [GO:0101031]; protein-containing complex [GO:0032991]; telomerase holoenzyme complex [GO:0005697]; DNA polymerase binding [GO:0070182]; Hsp90 protein binding [GO:0051879]; prostaglandin-E synthase activity [GO:0050220]; protein-folding chaperone bindin…	DNA polymerase binding [GO:0070182]; Hsp90 protein binding [GO:0051879]; prostaglandin-E synthase activity [GO:0050220]; protein-folding chaperone binding [GO:0051087]; telomerase activity [GO:0003720]; unfolded protein binding [GO:0051082]	GO:0000723; GO:0000781; GO:0001516; GO:0003720; GO:0005634; GO:0005654; GO:0005697; GO:0005829; GO:0005978; GO:0006457; GO:0007004; GO:0007165; GO:0019371; GO:0032991; GO:0042327; GO:0042921; GO:0043588; GO:0048144; GO:0050220; GO:0050821; GO:0051082; GO:0051085; GO:0051087; GO:0051131; GO:0051879; GO:0051973; GO:0060430; GO:0070182; GO:0101031; GO:1905323
sp|P02533|K1C14_HUMAN	K1C14_HUMAN	6779100	3992300	1792800	31145000	40150000	15802000	17821000	9644000	4926600	15693000	5321100	10562000	12	1.36357e+07	1.16254e+07	P02533	Keratin, type I cytoskeletal 14 (Cytokeratin-14) (CK-14) (Keratin-14) (K14)	epidermis development [GO:0008544]; epithelial cell differentiation [GO:0030855]; hair cycle [GO:0042633]; intermediate filament bundle assembly [GO:0045110]; intermediate filament organization [GO:0045109]; keratinocyte differentiation [GO:0030216]; stem cell differentiation [GO:0048863]	basal part of cell [GO:0045178]; cornified envelope [GO:0001533]; cytoplasm [GO:0005737]; cytosol [GO:0005829]; extracellular exosome [GO:0070062]; intermediate filament [GO:0005882]; keratin filament [GO:0045095]; nucleus [GO:0005634]	basal part of cell [GO:0045178]; cornified envelope [GO:0001533]; cytoplasm [GO:0005737]; cytosol [GO:0005829]; extracellular exosome [GO:0070062]; intermediate filament [GO:0005882]; keratin filament [GO:0045095]; nucleus [GO:0005634]; keratin filament binding [GO:1990254]; structural constituent of cytoskeleton [GO:0005200]; epidermis development [GO:0008544]; epithelial cell differentiation [G…	keratin filament binding [GO:1990254]; structural constituent of cytoskeleton [GO:0005200]	GO:0001533; GO:0005200; GO:0005634; GO:0005737; GO:0005829; GO:0005882; GO:0008544; GO:0030216; GO:0030855; GO:0042633; GO:0045095; GO:0045109; GO:0045110; GO:0045178; GO:0048863; GO:0070062; GO:1990254
sp|Q8NC51|PAIRB_HUMAN	PAIRB_HUMAN	11412000	3954800	9572600	10363000	16786000	23209000	6384400	20859000	15510000	24080000	15152000	5348200	12	1.35526e+07	6.84709e+06	Q8NC51	Plasminogen activator inhibitor 1 RNA-binding protein (PAI1 RNA-binding protein 1) (PAI-RBP1) (SERPINE1 mRNA-binding protein 1)	negative regulation of translation [GO:0017148]; PML body organization [GO:0030578]; regulation of mRNA stability [GO:0043488]	cytoplasm [GO:0005737]; cytosol [GO:0005829]; extracellular exosome [GO:0070062]; membrane [GO:0016020]; nucleus [GO:0005634]; perinuclear region of cytoplasm [GO:0048471]	cytoplasm [GO:0005737]; cytosol [GO:0005829]; extracellular exosome [GO:0070062]; membrane [GO:0016020]; nucleus [GO:0005634]; perinuclear region of cytoplasm [GO:0048471]; cadherin binding [GO:0045296]; mRNA 3'-UTR binding [GO:0003730]; ribosome binding [GO:0043022]; RNA binding [GO:0003723]; SUMO binding [GO:0032183]; translation repressor activity [GO:0030371]; negative regulation of translati…	cadherin binding [GO:0045296]; mRNA 3'-UTR binding [GO:0003730]; ribosome binding [GO:0043022]; RNA binding [GO:0003723]; SUMO binding [GO:0032183]; translation repressor activity [GO:0030371]	GO:0003723; GO:0003730; GO:0005634; GO:0005737; GO:0005829; GO:0016020; GO:0017148; GO:0030371; GO:0030578; GO:0032183; GO:0043022; GO:0043488; GO:0045296; GO:0048471; GO:0070062
sp|P13804|ETFA_HUMAN	ETFA_HUMAN	21798000	23594000	567360	8857900	5016900	8512900	10264000	4133900	675190	25012000	28219000	24083000	12	1.33945e+07	1.03577e+07	P13804	Electron transfer flavoprotein subunit alpha, mitochondrial (Alpha-ETF)	amino acid catabolic process [GO:0009063]; fatty acid beta-oxidation using acyl-CoA dehydrogenase [GO:0033539]; respiratory electron transport chain [GO:0022904]	electron transfer flavoprotein complex [GO:0045251]; mitochondrial matrix [GO:0005759]; mitochondrion [GO:0005739]	electron transfer flavoprotein complex [GO:0045251]; mitochondrial matrix [GO:0005759]; mitochondrion [GO:0005739]; electron transfer activity [GO:0009055]; flavin adenine dinucleotide binding [GO:0050660]; oxidoreductase activity [GO:0016491]; amino acid catabolic process [GO:0009063]; fatty acid beta-oxidation using acyl-CoA dehydrogenase [GO:0033539]; respiratory electron transport chain [GO:0…	electron transfer activity [GO:0009055]; flavin adenine dinucleotide binding [GO:0050660]; oxidoreductase activity [GO:0016491]	GO:0005739; GO:0005759; GO:0009055; GO:0009063; GO:0016491; GO:0022904; GO:0033539; GO:0045251; GO:0050660
sp|P35613|BASI_HUMAN	BASI_HUMAN	3577200	10821000	2622500	6121200	9783400	14565000	30327000	33030000	5206900	15489000	10940000	14568000	12	13087600	9.70617e+06	P35613	Basigin (5F7) (Collagenase stimulatory factor) (Extracellular matrix metalloproteinase inducer) (EMMPRIN) (Hepatoma-associated antigen) (HAb18G) (Leukocyte activation antigen M6) (OK blood group antigen) (Tumor cell-derived collagenase stimulatory factor) (TCSF) (CD antigen CD147)	angiogenesis [GO:0001525]; cell surface receptor signaling pathway [GO:0007166]; decidualization [GO:0046697]; embryo implantation [GO:0007566]; endothelial tube morphogenesis [GO:0061154]; neural retina development [GO:0003407]; neutrophil chemotaxis [GO:0030593]; odontogenesis of dentin-containing tooth [GO:0042475]; photoreceptor cell maintenance [GO:0045494]; positive regulation of endothelia…	acrosomal membrane [GO:0002080]; basolateral plasma membrane [GO:0016323]; endoplasmic reticulum membrane [GO:0005789]; endosome [GO:0005768]; extracellular exosome [GO:0070062]; focal adhesion [GO:0005925]; Golgi membrane [GO:0000139]; intracellular membrane-bounded organelle [GO:0043231]; melanosome [GO:0042470]; membrane [GO:0016020]; membrane raft [GO:0045121]; mitochondrion [GO:0005739]; pho…	acrosomal membrane [GO:0002080]; basolateral plasma membrane [GO:0016323]; endoplasmic reticulum membrane [GO:0005789]; endosome [GO:0005768]; extracellular exosome [GO:0070062]; focal adhesion [GO:0005925]; Golgi membrane [GO:0000139]; intracellular membrane-bounded organelle [GO:0043231]; melanosome [GO:0042470]; membrane [GO:0016020]; membrane raft [GO:0045121]; mitochondrion [GO:0005739]; pho…	cadherin binding [GO:0045296]; mannose binding [GO:0005537]; signaling receptor activity [GO:0038023]; virus receptor activity [GO:0001618]	GO:0000139; GO:0001525; GO:0001618; GO:0001750; GO:0001917; GO:0002080; GO:0003407; GO:0005537; GO:0005739; GO:0005768; GO:0005789; GO:0005886; GO:0005925; GO:0007166; GO:0007566; GO:0010575; GO:0010595; GO:0016020; GO:0016323; GO:0030593; GO:0032755; GO:0038023; GO:0042383; GO:0042470; GO:0042475; GO:0043231; GO:0043434; GO:0045121; GO:0045296; GO:0045494; GO:0046598; GO:0046689; GO:0046697; GO:…
sp|P08134|RHOC_HUMAN	RHOC_HUMAN	4443600	3659700	231100	28445000	8705200	12639000	34202000	28088000	285400	19290000	9990600	6288300	12	13022325	1.17284e+07	P08134	Rho-related GTP-binding protein RhoC (Rho cDNA clone 9) (h9)	apical junction assembly [GO:0043297]; mitotic cytokinesis [GO:0000281]; positive regulation of cell migration [GO:0030335]; positive regulation of I-kappaB kinase/NF-kappaB signaling [GO:0043123]; positive regulation of lipase activity [GO:0060193]; positive regulation of protein-containing complex assembly [GO:0031334]; positive regulation of stress fiber assembly [GO:0051496]; skeletal muscle …	cleavage furrow [GO:0032154]; cytoplasm [GO:0005737]; cytosol [GO:0005829]; endoplasmic reticulum membrane [GO:0005789]; extracellular exosome [GO:0070062]; neuron projection [GO:0043005]; nucleus [GO:0005634]; plasma membrane [GO:0005886]; stereocilium [GO:0032420]	cleavage furrow [GO:0032154]; cytoplasm [GO:0005737]; cytosol [GO:0005829]; endoplasmic reticulum membrane [GO:0005789]; extracellular exosome [GO:0070062]; neuron projection [GO:0043005]; nucleus [GO:0005634]; plasma membrane [GO:0005886]; stereocilium [GO:0032420]; GTP binding [GO:0005525]; GTPase activity [GO:0003924]; apical junction assembly [GO:0043297]; mitotic cytokinesis [GO:0000281]; po…	GTP binding [GO:0005525]; GTPase activity [GO:0003924]	GO:0000281; GO:0003924; GO:0005525; GO:0005634; GO:0005737; GO:0005789; GO:0005829; GO:0005886; GO:0007264; GO:0030335; GO:0031334; GO:0032154; GO:0032420; GO:0043005; GO:0043123; GO:0043297; GO:0044319; GO:0051496; GO:0060193; GO:0070062; GO:1902766
sp|P05023|AT1A1_HUMAN	AT1A1_HUMAN	6699600	10483000	1208200	9289600	11050000	14958000	30665000	27513000	2302700	17355000	11668000	10990000	12	1.28485e+07	8.88357e+06	P05023	Sodium/potassium-transporting ATPase subunit alpha-1 (Na(+)/K(+) ATPase alpha-1 subunit) (EC 7.2.2.13) (Sodium pump subunit alpha-1)	cardiac muscle cell action potential involved in contraction [GO:0086002]; cell communication by electrical coupling involved in cardiac conduction [GO:0086064]; cellular response to steroid hormone stimulus [GO:0071383]; establishment or maintenance of transmembrane electrochemical gradient [GO:0010248]; intracellular potassium ion homeostasis [GO:0030007]; intracellular sodium ion homeostasis […	apical plasma membrane [GO:0016324]; axon [GO:0030424]; basolateral plasma membrane [GO:0016323]; endoplasmic reticulum [GO:0005783]; extracellular exosome [GO:0070062]; extracellular vesicle [GO:1903561]; Golgi apparatus [GO:0005794]; lateral plasma membrane [GO:0016328]; melanosome [GO:0042470]; membrane [GO:0016020]; membrane raft [GO:0045121]; organelle membrane [GO:0031090]; photoreceptor in…	apical plasma membrane [GO:0016324]; axon [GO:0030424]; basolateral plasma membrane [GO:0016323]; endoplasmic reticulum [GO:0005783]; extracellular exosome [GO:0070062]; extracellular vesicle [GO:1903561]; Golgi apparatus [GO:0005794]; lateral plasma membrane [GO:0016328]; melanosome [GO:0042470]; membrane [GO:0016020]; membrane raft [GO:0045121]; organelle membrane [GO:0031090]; photoreceptor in…	ATP binding [GO:0005524]; ATP hydrolysis activity [GO:0016887]; P-type sodium:potassium-exchanging transporter activity [GO:0005391]; phosphatase activity [GO:0016791]; potassium ion binding [GO:0030955]; protein heterodimerization activity [GO:0046982]; protein-folding chaperone binding [GO:0051087]; sodium ion binding [GO:0031402]; steroid hormone binding [GO:1990239]	GO:0002026; GO:0002028; GO:0005391; GO:0005524; GO:0005783; GO:0005794; GO:0005886; GO:0005890; GO:0006883; GO:0008217; GO:0009410; GO:0010248; GO:0014069; GO:0016020; GO:0016323; GO:0016324; GO:0016328; GO:0016791; GO:0016887; GO:0030007; GO:0030315; GO:0030424; GO:0030955; GO:0031090; GO:0031402; GO:0031947; GO:0032991; GO:0036126; GO:0036376; GO:0042383; GO:0042470; GO:0045121; GO:0045822; GO:…
sp|P17980|PRS6A_HUMAN	PRS6A_HUMAN	17277000	15376000	740970	6684100	4564100	8184200	16193000	26393000	1145200	15957000	22164000	18871000	12	1.27958e+07	8.34083e+06	P17980	26S proteasome regulatory subunit 6A (26S proteasome AAA-ATPase subunit RPT5) (Proteasome 26S subunit ATPase 3) (Proteasome subunit P50) (Tat-binding protein 1) (TBP-1)	modulation by host of viral transcription [GO:0043921]; positive regulation of proteasomal protein catabolic process [GO:1901800]; positive regulation of transcription by RNA polymerase II [GO:0045944]; proteasome-mediated ubiquitin-dependent protein catabolic process [GO:0043161]	cytosol [GO:0005829]; extracellular region [GO:0005576]; ficolin-1-rich granule lumen [GO:1904813]; membrane [GO:0016020]; nucleoplasm [GO:0005654]; nucleus [GO:0005634]; P-body [GO:0000932]; proteasome accessory complex [GO:0022624]; proteasome complex [GO:0000502]; proteasome regulatory particle, base subcomplex [GO:0008540]; secretory granule lumen [GO:0034774]	cytosol [GO:0005829]; extracellular region [GO:0005576]; ficolin-1-rich granule lumen [GO:1904813]; membrane [GO:0016020]; nucleoplasm [GO:0005654]; nucleus [GO:0005634]; P-body [GO:0000932]; proteasome accessory complex [GO:0022624]; proteasome complex [GO:0000502]; proteasome regulatory particle, base subcomplex [GO:0008540]; secretory granule lumen [GO:0034774]; ATP binding [GO:0005524]; ATP h…	ATP binding [GO:0005524]; ATP hydrolysis activity [GO:0016887]; identical protein binding [GO:0042802]; proteasome-activating activity [GO:0036402]	GO:0000502; GO:0000932; GO:0005524; GO:0005576; GO:0005634; GO:0005654; GO:0005829; GO:0008540; GO:0016020; GO:0016887; GO:0022624; GO:0034774; GO:0036402; GO:0042802; GO:0043161; GO:0043921; GO:0045944; GO:1901800; GO:1904813
sp|P40227|TCPZ_HUMAN	TCPZ_HUMAN	12281000	12070000	440870	6184400	6344200	12964000	17807000	32721000	477740	14668000	20974000	12653000	12	1.24654e+07	8.9532e+06	P40227	T-complex protein 1 subunit zeta (TCP-1-zeta) (Acute morphine dependence-related protein 2) (CCT-zeta-1) (HTR3) (Tcp20)	chaperone-mediated protein folding [GO:0061077]; positive regulation of establishment of protein localization to telomere [GO:1904851]; positive regulation of protein localization to Cajal body [GO:1904871]; positive regulation of telomerase RNA localization to Cajal body [GO:1904874]; positive regulation of telomere maintenance via telomerase [GO:0032212]; protein folding [GO:0006457]; protein s…	chaperonin-containing T-complex [GO:0005832]; cytoplasm [GO:0005737]; cytosol [GO:0005829]; extracellular exosome [GO:0070062]; microtubule [GO:0005874]	chaperonin-containing T-complex [GO:0005832]; cytoplasm [GO:0005737]; cytosol [GO:0005829]; extracellular exosome [GO:0070062]; microtubule [GO:0005874]; ATP binding [GO:0005524]; ATP hydrolysis activity [GO:0016887]; ATP-dependent protein folding chaperone [GO:0140662]; protein folding chaperone [GO:0044183]; RNA binding [GO:0003723]; unfolded protein binding [GO:0051082]; WD40-repeat domain bin…	ATP binding [GO:0005524]; ATP hydrolysis activity [GO:0016887]; ATP-dependent protein folding chaperone [GO:0140662]; protein folding chaperone [GO:0044183]; RNA binding [GO:0003723]; unfolded protein binding [GO:0051082]; WD40-repeat domain binding [GO:0071987]	GO:0003723; GO:0005524; GO:0005737; GO:0005829; GO:0005832; GO:0005874; GO:0006457; GO:0016887; GO:0032212; GO:0044183; GO:0050821; GO:0051082; GO:0061077; GO:0070062; GO:0071987; GO:0140662; GO:1904851; GO:1904871; GO:1904874
sp|P24752|THIL_HUMAN	THIL_HUMAN	15511000	11856000	553050	18926000	4565600	19782000	10494000	5782000	465860	33078000	15197000	12612000	12	1.24019e+07	9.21504e+06	P24752	Acetyl-CoA acetyltransferase, mitochondrial (EC 2.3.1.9) (Acetoacetyl-CoA thiolase) (T2)	acetyl-CoA biosynthetic process [GO:0006085]; acetyl-CoA catabolic process [GO:0046356]; adipose tissue development [GO:0060612]; brain development [GO:0007420]; coenzyme A biosynthetic process [GO:0015937]; coenzyme A metabolic process [GO:0015936]; fatty acid beta-oxidation [GO:0006635]; isoleucine catabolic process [GO:0006550]; ketone body catabolic process [GO:0046952]; ketone body metabolic…	endoplasmic reticulum [GO:0005783]; extracellular exosome [GO:0070062]; mitochondrial matrix [GO:0005759]; mitochondrion [GO:0005739]	endoplasmic reticulum [GO:0005783]; extracellular exosome [GO:0070062]; mitochondrial matrix [GO:0005759]; mitochondrion [GO:0005739]; acetyl-CoA C-acetyltransferase activity [GO:0003985]; C-acetyltransferase activity [GO:0016453]; cholesterol O-acyltransferase activity [GO:0034736]; coenzyme A binding [GO:0120225]; enzyme binding [GO:0019899]; identical protein binding [GO:0042802]; potassium io…	acetyl-CoA C-acetyltransferase activity [GO:0003985]; C-acetyltransferase activity [GO:0016453]; cholesterol O-acyltransferase activity [GO:0034736]; coenzyme A binding [GO:0120225]; enzyme binding [GO:0019899]; identical protein binding [GO:0042802]; potassium ion binding [GO:0030955]	GO:0001889; GO:0003985; GO:0005739; GO:0005759; GO:0005783; GO:0006085; GO:0006550; GO:0006635; GO:0007420; GO:0009725; GO:0014070; GO:0015936; GO:0015937; GO:0016453; GO:0019899; GO:0030955; GO:0034736; GO:0042594; GO:0042802; GO:0046356; GO:0046952; GO:0060612; GO:0070062; GO:0072229; GO:0120225; GO:1902224; GO:1902860
sp|P35637|FUS_HUMAN	FUS_HUMAN	6547400	12340000	18665000	11878000	3664400	7866700	7235500	14684000	14311000	22676000	15793000	12306000	12	1.23306e+07	5.42084e+06	P35637	RNA-binding protein FUS (75 kDa DNA-pairing protein) (Oncogene FUS) (Oncogene TLS) (POMp75) (Translocated in liposarcoma protein)	amyloid fibril formation [GO:1990000]; mRNA stabilization [GO:0048255]; positive regulation of double-strand break repair via homologous recombination [GO:1905168]; protein homooligomerization [GO:0051260]; regulation of DNA-templated transcription [GO:0006355]; regulation of RNA splicing [GO:0043484]; regulation of transcription by RNA polymerase II [GO:0006357]; RNA splicing [GO:0008380]	cytoplasm [GO:0005737]; intracellular non-membrane-bounded organelle [GO:0043232]; nucleoplasm [GO:0005654]; nucleus [GO:0005634]	cytoplasm [GO:0005737]; intracellular non-membrane-bounded organelle [GO:0043232]; nucleoplasm [GO:0005654]; nucleus [GO:0005634]; chromatin binding [GO:0003682]; DNA binding [GO:0003677]; identical protein binding [GO:0042802]; metal ion binding [GO:0046872]; molecular condensate scaffold activity [GO:0140693]; mRNA 3'-UTR binding [GO:0003730]; RNA binding [GO:0003723]; transcription coactivator…	chromatin binding [GO:0003682]; DNA binding [GO:0003677]; identical protein binding [GO:0042802]; metal ion binding [GO:0046872]; molecular condensate scaffold activity [GO:0140693]; mRNA 3'-UTR binding [GO:0003730]; RNA binding [GO:0003723]; transcription coactivator activity [GO:0003713]; transcription coregulator activity [GO:0003712]	GO:0003677; GO:0003682; GO:0003712; GO:0003713; GO:0003723; GO:0003730; GO:0005634; GO:0005654; GO:0005737; GO:0006355; GO:0006357; GO:0008380; GO:0042802; GO:0043232; GO:0043484; GO:0046872; GO:0048255; GO:0051260; GO:0140693; GO:1905168; GO:1990000
[truncated: 941 more rows]
